# Supplementary material for: Alternative splicing events are prognostic in hepatocellular carcinoma
Source: publisher site journal article supplement (doi:10.18632/aging.102085), 2019-07-13
Supplement: Supplementary file [file aging-v11i13-102085-supplementary-material-SD1.pdf]

## SUPPLEMENTARY FIGURES

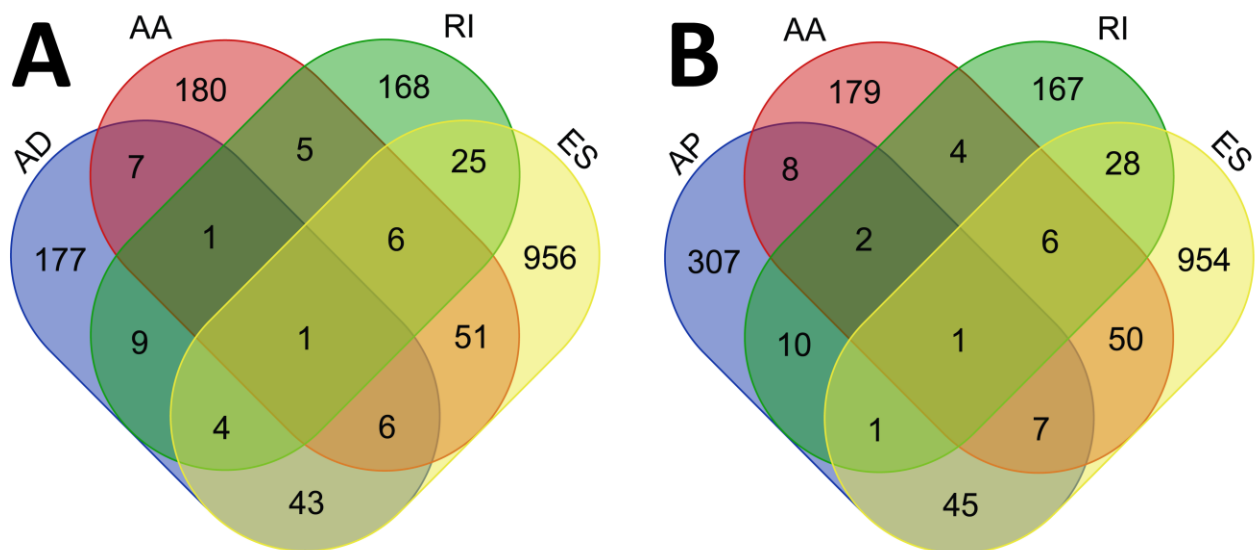

**Supplementary Figure 1. Venn diagrams demonstrating that individual genes could be associated with at least four AS patterns. (A) AA, AD, ES, and RI events in the *TMEM205* gene; (B) AA, AP, ES, and RI events in the *CIRBP* gene.**

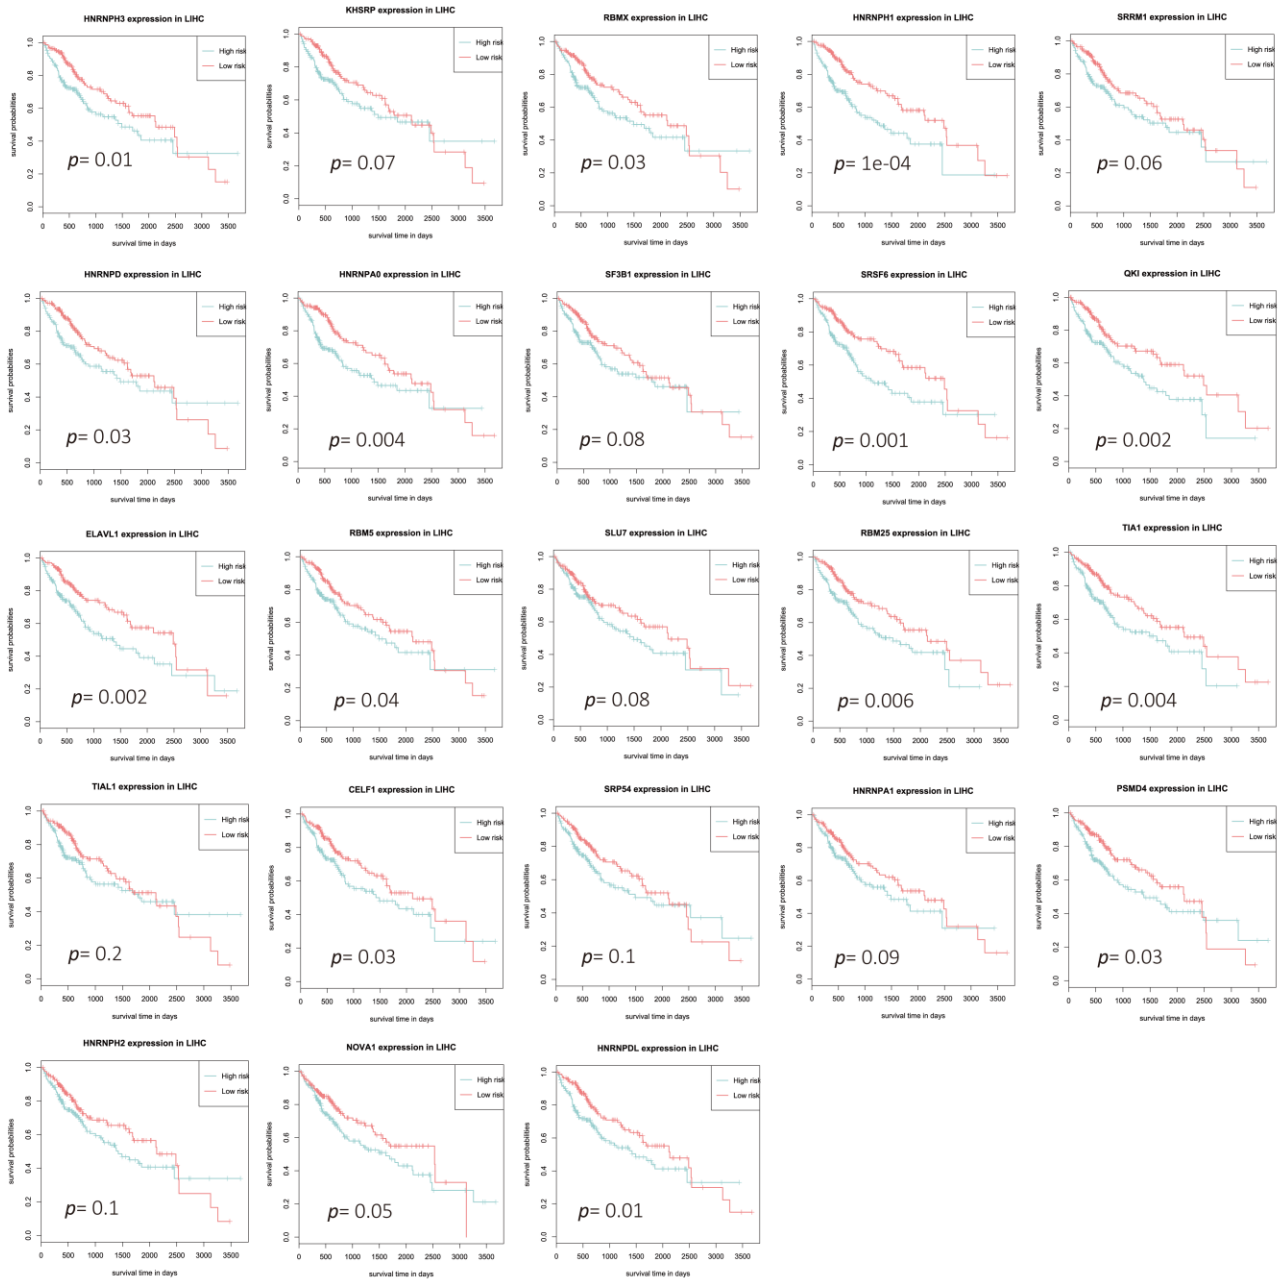

**Supplementary Figure 2.** Kaplan-Meier curves showing correlations between the expression of 23 splicing factors with OS in the HCC cohort.
