# Supplementary material for: Alternative splicing events are prognostic in hepatocellular carcinoma
Source: Aging (Albany NY). 2019 Jul 13;11(13):4720–35. doi: 10.18632/aging.102085 (PMC6660027; doi:10.18632/aging.102085)
Supplement: Supplementary Table 1 [file aging-11-102085-s002.xlsx]

## Sheet: Supplementary Table S1
	symbol	splice_type	exons	from_exon	to_exon	novel_splice	pct_with_values	psi_range	std_psi	LUADmarker	LUADgene	LUADpvalue	LUADHR	LUADlow	LUADhigh
ID_43804	AFMID	ES	7:8:9:10:11.1	6	12	0	1	0.9964	0.2524	ID_43804	AFMID	0.000101467	0.191956	0.0835164	0.441196
ID_82341	FASTK	ES	2	1.1	3.1	0	0.9952	0.1868	0.0322	ID_82341	FASTK	0.000102497	6.56e-05	5.09e-07	0.00846397
ID_74856	PHYKPL	AA	11.1	10	11.2	0	0.9952	0.1786	0.0283	ID_74856	PHYKPL	0.000105886	2.08e-05	8.95e-08	0.00484647
ID_862	ARHGEF10L	ES	18	17	19	0	0.9359	0.9213	0.1936	ID_862	ARHGEF10L	0.000105887	0.191109	0.0827778	0.441214
ID_64633	NME6	AD	1.2:1.3	1.1	3.2	0	0.8789	0.7348	0.1384	ID_64633	NME6	0.000110055	18.3525	4.19997	80.1945
ID_48537	HOMER3	AA	12.1	11	12.2	0	0.9382	0.0068	0.0003	ID_48537	HOMER3	0.000111233	5.5e-272	0	2.04e-134
ID_24640	SLC8B1	ES	8	7	9	0	0.9596	0.3265	0.0407	ID_24640	SLC8B1	0.000113732	0.000453116	9.08e-06	0.0226145
ID_45804	CYB5A	AP	NA	NA	NA	0	1	0.0251	0.004	ID_45804	CYB5A	0.000114341	1.34e-32	8.64e-49	2.09e-16
ID_45803	CYB5A	AP	2	NA	NA	0	1	0.0251	0.004	ID_45803	CYB5A	0.000114341	7.44e+31	4783690000000000	1.16e+48
ID_85437	EEF1D	AP	2	NA	NA	0	1	0.1929	0.03	ID_85437	EEF1D	0.000115509	26725.3	150.125	4.75766e+06
ID_61101	COMT	AA	8.1	7	8.2	0	1	0.0528	0.0075	ID_61101	COMT	0.000115847	6.42131e+17	5.66589e+08	7.28e+26
ID_24518	ATXN2	ES	21	20	22	0	0.9572	0.9187	0.143	ID_24518	ATXN2	0.000116668	0.0828339	0.0233303	0.294101
ID_52102	RPL28	RI	1.2	1.1	1.3	0	1	0.005	0.0006	ID_52102	RPL28	0.000117093	2.24e+225	4.93e+110	Inf
ID_12281	KCNMA1	AT	NA	NA	NA	0	0.9857	0.99	0.1952	ID_12281	KCNMA1	0.000117327	0.136827	0.0497278	0.376481
ID_62619	PRR5	ES	2	1	3.2	0	0.9929	0.7641	0.1591	ID_62619	PRR5	0.00011823	0.148968	0.056507	0.392718
ID_16408	BSCL2	AD	4.3	4.2	5	0	0.8931	0.2699	0.045	ID_16408	BSCL2	0.000118653	1748.83	39.0346	78351.2
ID_72590	WDR41	ES	02:04:00	1.1	5	0	0.9192	0.0898	0.0074	ID_72590	WDR41	0.000119582	1.99e-21	5.67e-32	7.02e-11
ID_16624	GPR137	ES	7	6	8	0	1	0.2599	0.0442	ID_16624	GPR137	0.000119637	0.00215823	9.46e-05	0.0492452
ID_50996	IRF3	ES	5.1	4	6.2	0	1	0.1716	0.0176	ID_50996	IRF3	0.000122329	2.98e-05	1.46e-07	0.00606954
ID_17233	TMEM134	AA	6.1	4.1	6.2	0	1	0.4071	0.0605	ID_17233	TMEM134	0.000123322	206.256	13.5813	3132.38
ID_8610	APOA2	AA	3.1	2	3.2	0	0.9976	0.0479	0.0041	ID_8610	APOA2	0.000123591	1.96e+22	81381422485	4.71e+33
ID_29057	IFI27L1	ES	7.1:7.2	6	8	0	0.9905	0.5538	0.0807	ID_29057	IFI27L1	0.00012486	0.0190127	0.00251089	0.143966
ID_53554	GPR75-ASB3	AP	2.1	NA	NA	0	0.8266	0.583	0.0999	ID_53554	GPR75-ASB3	0.000126196	115.796	10.2013	1314.4
ID_53555	GPR75-ASB3	AP	NA	NA	NA	0	0.8266	0.583	0.0999	ID_53555	GPR75-ASB3	0.000126196	0.00863591	0.000760802	0.0980267
ID_52929	KHK	ME	3|4	2	5	0	0.9976	0.9745	0.1918	ID_52929	KHK	0.0001281	5.96768	2.39223	14.887
ID_70898	PLRG1	AD	6.2	6.1	7	0	0.9406	0.1097	0.0228	ID_70898	PLRG1	0.000129613	3.97e-07	2.09e-10	0.000753242
ID_51014	IRF3	ES	1.4:2	1.1	3	0	0.9929	0.1395	0.0236	ID_51014	IRF3	0.000129995	6.89e-06	1.56e-08	0.00303436
ID_13653	SIGIRR	ES	9	8	10.1	1	0.9026	0.5868	0.0943	ID_13653	SIGIRR	0.000130748	0.0404972	0.00783186	0.209404
ID_50360	APOC1	AD	5.2:5.3	5.1	7	0	1	0.0225	0.0024	ID_50360	APOC1	0.000130832	2.85e+40	5.30585e+19	1.53e+61
ID_49874	AKT2	ES	11	10	12	0	0.9881	0.2474	0.0222	ID_49874	AKT2	0.000131416	8.91e-05	7.48e-07	0.0106129
ID_53682	PEX13	AT	2.3	NA	NA	0	1	0.5232	0.0725	ID_53682	PEX13	0.000131782	88.8707	8.9064	886.779
ID_53681	PEX13	AT	5	NA	NA	0	1	0.5232	0.0725	ID_53681	PEX13	0.00013179	0.0112524	0.00112768	0.11228
ID_85880	NFIB	AP	NA	NA	NA	0	0.8646	0.0169	0.001	ID_85880	NFIB	0.000134735	4.85e+109	2.36e+53	9.94e+165
ID_80899	TAF6	AD	2.3	2.2	3.2	0	0.8456	1	0.1091	ID_80899	TAF6	0.000134946	24.4151	4.73333	125.936
ID_8451	DCAF8	AD	7.2:7.3	7.1	9	1	0.7815	0.668	0.1111	ID_8451	DCAF8	0.0001357	19.6007	4.25126	90.3706
ID_78753	ZDHHC4	AD	1.2:1.3	1.1	2.2	0	0.9359	0.8502	0.1315	ID_78753	ZDHHC4	0.0001377	8.15649	2.77256	23.9953
ID_88297	EXD3	AT	12	NA	NA	0	1	0.7374	0.1236	ID_88297	EXD3	0.00013923	0.0410731	0.00794782	0.21226
ID_11957	CCAR1	ES	00:05:06.100000	3	6.2	0	0.8076	0.2759	0.0356	ID_11957	CCAR1	0.000140408	0.00019926	2.48e-06	0.0160093
ID_10823	FAM107B	AP	4	NA	NA	0	0.8385	0.4395	0.0851	ID_10823	FAM107B	0.000143038	0.00391317	0.000224769	0.0681274
ID_44556	ARHGAP28	AP	6	NA	NA	0	1	0.0769	0.0037	ID_44556	ARHGAP28	0.000147153	1.62e+23	168183000000	1.57e+35
ID_8910	NME7	AT	11.2	NA	NA	0	1	0.0089	0.0004	ID_8910	NME7	0.000147153	3.54e+200	9.9e+96	1.26e+304
ID_8911	NME7	AT	14	NA	NA	0	1	0.0089	0.0004	ID_8911	NME7	0.000147153	2.83e-201	7.92e-305	1.01e-97
ID_30895	LIPC	AT	11	NA	NA	0	0.9905	0.149	0.0155	ID_30895	LIPC	0.000147299	1.62346e+06	1008.07	2614531507
ID_30894	LIPC	AT	12	NA	NA	0	0.9905	0.149	0.0155	ID_30894	LIPC	0.000147493	6.16e-07	3.83e-10	0.000993014
ID_13004	USMG5	ES	2.2	1	4	0	1	0.2911	0.0363	ID_13004	USMG5	0.000148264	384.263	17.7585	8314.78
ID_41789	TMUB2	ES	4.7:4.8	4.5	5	0	0.7957	1	0.2268	ID_41789	TMUB2	0.000148399	0.175882	0.0716602	0.431682
ID_16919	CFL1	AP	NA	NA	NA	0	0.9739	0.5865	0.119	ID_16919	CFL1	0.000149732	16.1727	3.83637	68.1777
ID_12279	KCNMA1	AT	2.2	NA	NA	0	0.9857	0.99	0.1994	ID_12279	KCNMA1	0.000150946	6.79504	2.52218	18.3066
ID_33198	TSC2	ES	5	4	6	0	0.8076	0.1844	0.0255	ID_33198	TSC2	0.000151733	5.93e-06	1.17e-08	0.00300201
ID_86506	CBWD5	ES	8	7	10	0	0.9739	0.2857	0.0437	ID_86506	CBWD5	0.000153587	0.000933874	2.52e-05	0.034599
ID_68075	MASP1	AT	19	NA	NA	0	0.9976	0.8701	0.2302	ID_68075	MASP1	0.000155578	0.232821	0.109393	0.495512
ID_55030	IL1RN	AP	6.1	NA	NA	0	0.9074	0.9186	0.0714	ID_55030	IL1RN	0.000157851	0.0242361	0.00351911	0.166914
ID_39181	RPL26	AD	1.2	1.1	2.2	0	1	0.0203	0.0021	ID_39181	RPL26	0.000158645	3.96e+59	4.7e+28	3.34e+90
ID_21792	LETMD1	ES	02:04:00	1.2	5	0	0.7577	0.4399	0.045	ID_21792	LETMD1	0.000160708	0.00296883	0.000144539	0.0609799
ID_16922	CFL1	AP	5.1	NA	NA	0	0.9739	0.8238	0.1498	ID_16922	CFL1	0.000161703	0.111839	0.0358328	0.349062
ID_91666	A1CF	ES	2	1	4	0	0.9264	0.6832	0.0879	ID_91666	A1CF	0.000162328	0.00623094	0.000445046	0.0872373
ID_33212	MLST8	AP	NA	NA	NA	0	0.9382	0.8578	0.1396	ID_33212	MLST8	0.000162968	0.0567952	0.0127871	0.252262
ID_33211	MLST8	AP	2	NA	NA	0	0.9382	0.8578	0.1396	ID_33211	MLST8	0.000163078	17.6054	3.96368	78.1973
ID_15770	PTPMT1	RI	1.2	1.1	1.3	0	1	0.4547	0.0635	ID_15770	PTPMT1	0.000163922	99.036	9.0767	1080.58
ID_54765	IL1R2	AP	2	NA	NA	0	0.8266	1	0.1308	ID_54765	IL1R2	0.000167617	0.129443	0.0446327	0.375409
ID_54766	IL1R2	AP	NA	NA	NA	0	0.8266	1	0.1308	ID_54766	IL1R2	0.000167617	7.72541	2.66376	22.4051
ID_25951	DHRS12	AT	9	NA	NA	0	1	0.2349	0.0408	ID_25951	DHRS12	0.000172855	1977.84	37.673	103837
ID_25950	DHRS12	AT	10.3	NA	NA	0	1	0.2349	0.0408	ID_25950	DHRS12	0.000172891	0.000505661	9.63e-06	0.0265471
ID_32761	PCSK6	ES	17	16	18	0	0.9572	0.7063	0.1087	ID_32761	PCSK6	0.000174722	0.0562971	0.0125298	0.252947
ID_26250	CARKD	AP	2	NA	NA	0	0.9335	0.7805	0.187	ID_26250	CARKD	0.000176314	0.10816	0.0338309	0.345795
ID_26251	CARKD	AP	NA	NA	NA	0	0.9335	0.7805	0.187	ID_26251	CARKD	0.000176314	9.24557	2.89189	29.5588
ID_26522	ARHGEF40	ES	21	20	22	0	0.9976	0.2342	0.0322	ID_26522	ARHGEF40	0.000176752	0.000392237	6.5e-06	0.0236537
ID_31054	USP3	ES	2:3.2:5:7:8:9:10	1	11	0	0.8527	0.0893	0.0061	ID_31054	USP3	0.000177395	3.72e-22	2.34e-33	5.93e-11
ID_50820	PLEKHA4	ES	18	17	19	1	0.8812	0.5901	0.1034	ID_50820	PLEKHA4	0.000178453	0.0310103	0.00504197	0.190727
ID_44649	MPPE1	ES	9.2:10	8	11	0	0.9857	0.1938	0.0266	ID_44649	MPPE1	0.000179527	6.74e-05	4.43e-07	0.0102598
ID_79535	DDX56	ES	7	6	8.1	0	1	0.01	0.0011	ID_79535	DDX56	0.000180154	2.87e-96	2.88e-146	2.86e-46
ID_45660	NEDD4L	ES	18	17	19	0	0.8219	1	0.1401	ID_45660	NEDD4L	0.000180824	0.109261	0.0342895	0.348152
ID_67274	SERP1	ES	3.1	2	4	0	1	0.0325	0.0018	ID_67274	SERP1	0.000181512	9.39e-61	3.5e-92	2.52e-29
ID_33146	HAGH	ES	6	5	7	0	1	0.1122	0.0171	ID_33146	HAGH	0.000182267	4.56e-07	2.18e-10	0.000954694
ID_117545	NOP16	AA	5.1	4.1	5.2	1	0.7957	0.1771	0.0271	ID_117545	NOP16	0.000186086	1.43658e+07	2533.27	81466573618
ID_25568	HMGB1	AP	2	NA	NA	0	1	0.2972	0.0485	ID_25568	HMGB1	0.000188567	5406.49	59.3537	492473
ID_29934	EIF2AK4	AT	40	NA	NA	0	1	0.1459	0.0138	ID_29934	EIF2AK4	0.00019369	6.57e-10	9.74e-15	4.43e-05
ID_44648	MPPE1	ES	9.1:9.2:10	8	11	0	0.9549	0.4884	0.0718	ID_44648	MPPE1	0.000195641	0.0223205	0.00301823	0.165065
ID_58035	ATG16L1	ES	11.2:12.1	11.1	12.2	0	0.9287	0.0235	0.0012	ID_58035	ATG16L1	0.000200117	3.87e-75	2.35e-114	6.39e-36
ID_878	UBR4	AT	107	NA	NA	0	1	0.0602	0.0097	ID_878	UBR4	0.000200799	1.80793e+16	4.86566e+07	6.72e+24
ID_53567	ACYP2	AT	3	NA	NA	0	1	0.3265	0.0315	ID_53567	ACYP2	0.000201235	6227.77	62.207	623485
ID_879	UBR4	AT	NA	NA	NA	0	1	0.0602	0.0097	ID_879	UBR4	0.000201299	5.58e-17	1.5e-25	2.07e-08
ID_25566	HMGB1	AP	4.1	NA	NA	0	1	0.2944	0.044	ID_25566	HMGB1	0.000201514	7.5e-05	5.01e-07	0.01122
ID_39180	RPL26	AD	1.2:1.3	1.1	2.2	0	1	0.0499	0.0048	ID_39180	RPL26	0.000201916	3.57e+23	135562000000	9.41e+35
ID_44175	FAM195B	ES	4.1	3.3	4.3	0	1	0.1304	0.0147	ID_44175	FAM195B	0.000201987	1.28e-06	9.95e-10	0.0016383
ID_16830	SLC25A45	ES	7	6.2	8	0	0.8622	0.1698	0.0197	ID_16830	SLC25A45	0.000204158	1.83e-06	1.72e-09	0.00195247
ID_2853	CYP4A11	ES	8:9.2:9.3:9.4:10	7.2	11.1	0	0.9739	0.3586	0.05	ID_2853	CYP4A11	0.000209804	0.00285713	0.000129062	0.0632503
ID_85545	MROH1	ES	33	32	34	0	0.9762	0.0417	0.0044	ID_85545	MROH1	0.000216953	1.12e-24	2.28e-37	5.53e-12
ID_77546	EPB41L2	ES	18:20.1:20.2:21	17	22	0	0.9097	0.0561	0.0029	ID_77546	EPB41L2	0.000217455	1.01e-31	3.78e-48	2.71e-15
ID_31294	SMAD6	AP	2	NA	NA	0	0.9691	0.8851	0.2042	ID_31294	SMAD6	0.000217583	5.95542	2.31296	15.3341
ID_31295	SMAD6	AP	NA	NA	NA	0	0.9691	0.8851	0.2042	ID_31295	SMAD6	0.000217583	0.167914	0.0652143	0.432347
ID_56798	CFLAR	ES	11:12:00	8.1	13	0	0.924	0.1698	0.0093	ID_56798	CFLAR	0.000218062	2.5e-10	2.03e-15	3.08e-05
ID_22723	TSPAN31	AT	6.2	NA	NA	0	1	0.3884	0.0429	ID_22723	TSPAN31	0.000219647	269.369	13.8452	5240.79
ID_85462	EEF1D	ES	4	1	8.1	0	1	0.0332	0.0047	ID_85462	EEF1D	0.000219658	1.24e+26	1792940000000	8.58e+39
ID_22724	TSPAN31	AT	7	NA	NA	0	1	0.3884	0.0429	ID_22724	TSPAN31	0.000219871	0.00371332	0.000190845	0.0722509
ID_33872	NAGPA	ES	9	8	10	0	1	0.1127	0.0117	ID_33872	NAGPA	0.000219956	5.34e-10	6.43e-15	4.43e-05
ID_3785	DR1	RI	1.2	1.1	1.3	0	0.9121	0.0409	0.0025	ID_3785	DR1	0.000222517	7.79e-89	1.31e-135	4.63e-42
ID_71195	HPGD	ES	7	6	8	0	0.829	0.2066	0.0311	ID_71195	HPGD	0.000227749	7.94e-05	5.25e-07	0.0120232
ID_51205	JOSD2	ES	4	3.2	5	0	1	0.4602	0.0602	ID_51205	JOSD2	0.000228255	0.0114537	0.00106337	0.123369
ID_34354	ACSM5	AT	14	NA	NA	0	1	0.5642	0.1023	ID_34354	ACSM5	0.000231416	0.0523894	0.0109014	0.25177
ID_34353	ACSM5	AT	4.2	NA	NA	0	1	0.5642	0.1023	ID_34353	ACSM5	0.000231455	19.0871	3.97174	91.7276
ID_75037	BTNL9	AT	13	NA	NA	0	1	0.7898	0.1588	ID_75037	BTNL9	0.00023152	0.14159	0.0500156	0.400831
ID_58749	SNX5	RI	1.2:1.3	1.1	1.4	0	0.924	0.5585	0.0709	ID_58749	SNX5	0.000235061	0.0298504	0.00459484	0.193923
ID_55054	CBWD2	ES	12	11	13	0	0.9786	0.8772	0.2174	ID_55054	CBWD2	0.000236483	4.19413	1.95301	9.00696
ID_92844	SLC37A4	ES	9	8	10	1	0.8266	0.3574	0.0585	ID_92844	SLC37A4	0.000237011	0.00499929	0.000296471	0.0843012
ID_43158	ABCA9	AT	6.2	NA	NA	0	1	0.3684	0.0622	ID_43158	ABCA9	0.000240565	80.3483	7.73047	835.118
ID_43157	ABCA9	AT	39	NA	NA	0	1	0.3684	0.0622	ID_43157	ABCA9	0.000240653	0.0124468	0.00119751	0.129371
ID_45359	EPG5	ES	1 day, 12:37:00	35	38	0	0.8432	0.0764	0.007	ID_45359	EPG5	0.000243082	1.08e-18	2.73e-28	4.26e-09
ID_3564	LPHN2	ES	29	27	31	1	0.81	0.6858	0.1126	ID_3564	LPHN2	0.000248753	0.0172715	0.00196931	0.151476
ID_32923	C16orf13	ES	2	1	5	0	0.9667	0.8743	0.203	ID_32923	C16orf13	0.000248935	0.19686	0.0825119	0.469674
ID_46286	TXNL4A	ES	7.2	3	9	0	1	0.0829	0.0123	ID_46286	TXNL4A	0.000253668	1.34e-11	2e-17	8.95e-06
ID_79705	DDC	ES	04:05:00	3.2	6	0	0.9216	0.0482	0.0047	ID_79705	DDC	0.000254769	3.59e-21	3.97e-32	3.25e-10
ID_10817	FAM107B	AP	3	NA	NA	0	0.8385	0.9408	0.1648	ID_10817	FAM107B	0.000255192	12.103	3.18066	46.0545
ID_37676	WWOX	AT	1.2	NA	NA	0	1	0.4151	0.051	ID_37676	WWOX	0.000259264	161.019	10.5387	2460.18
ID_70844	PET112	AT	14	NA	NA	0	1	0.2155	0.026	ID_70844	PET112	0.000262517	4.51e-06	6.06e-09	0.00334802
ID_40859	RARA	AP	NA	NA	NA	0	0.9952	0.3068	0.0463	ID_40859	RARA	0.000266405	232.84	12.4334	4360.36
ID_81528	CAV1	AP	NA	NA	NA	0	0.8622	0.9658	0.1983	ID_81528	CAV1	0.000269235	0.19681	0.0820849	0.47188
ID_81529	CAV1	AP	2.1	NA	NA	0	0.8622	0.9658	0.1983	ID_81529	CAV1	0.000269235	5.08104	2.11918	12.1825
ID_30674	ARPP19	ES	4	2.6	5.2	0	0.905	0.3777	0.07	ID_30674	ARPP19	0.000272974	0.00369428	0.000180987	0.0754069
ID_44107	AZI1	ES	19	18	20	0	0.9549	0.5635	0.0819	ID_44107	AZI1	0.000272975	0.0397862	0.00700954	0.225826
ID_33166	NDUFB10	RI	3.2	3.1	3.3	0	1	0.5252	0.0921	ID_33166	NDUFB10	0.000275357	28.0379	4.65218	168.98
ID_17012	YIF1A	ES	2	1	3	0	1	0.0146	0.0015	ID_17012	YIF1A	0.000276079	1.45e-68	4e-105	5.27e-32
ID_37726	CMC2	ES	07:09:00	5	12	0	0.9667	1	0.2329	ID_37726	CMC2	0.000276146	0.222236	0.0988066	0.499852
ID_8282	IQGAP3	RI	38.2	38.1	38.3	0	0.9572	0.0983	0.011	ID_8282	IQGAP3	0.000279312	1.81e-09	3.49e-14	9.4e-05
ID_39434	UBB	RI	3.2	3.1	3.3	0	1	0.0786	0.0114	ID_39434	UBB	0.000279555	15136700000000	1.17655e+06	1.95e+20
ID_46476	DAZAP1	ES	13	12	14	0	1	0.1422	0.0233	ID_46476	DAZAP1	0.000281409	1.51e-07	3.15e-11	0.000724857
ID_32902	PIGQ	AT	14	NA	NA	0	1	0.2288	0.0406	ID_32902	PIGQ	0.000282473	0.00183876	6.14e-05	0.0551
ID_32901	PIGQ	AT	6.4	NA	NA	0	1	0.2288	0.0406	ID_32901	PIGQ	0.000282473	543.845	18.1488	16296.8
ID_26334	F7	RI	4.3	4.2	4.4	0	0.924	0.8068	0.0766	ID_26334	F7	0.000282792	98.0095	8.24675	1164.81
ID_64630	NME6	ES	2.1:2.2	1.1	3.2	0	0.7648	0.3824	0.0609	ID_64630	NME6	0.000283679	216.149	11.8592	3939.57
ID_44554	ARHGAP28	AP	2	NA	NA	0	1	0.8604	0.1934	ID_44554	ARHGAP28	0.000285098	0.24206	0.112497	0.52084
ID_88260	NPDC1	AP	2.1	NA	NA	0	0.9834	0.9693	0.1782	ID_88260	NPDC1	0.000287962	0.154765	0.0564484	0.424318
ID_88261	NPDC1	AP	NA	NA	NA	0	0.9834	0.9693	0.1782	ID_88261	NPDC1	0.000287962	6.46143	2.35672	17.7153
ID_48502	CRTC1	AP	NA	NA	NA	0	0.8409	0.0294	0.0016	ID_48502	CRTC1	0.000288856	1.05e-58	4.72e-90	2.33e-27
ID_48500	CRTC1	AP	2	NA	NA	0	0.8409	0.0294	0.0016	ID_48500	CRTC1	0.000288856	9.53e+57	4.28e+26	2.12e+89
ID_74394	CLINT1	AA	11.1	10	11.2	0	0.9572	0.8502	0.1088	ID_74394	CLINT1	0.000289268	21.9401	4.1305	116.54
ID_32404	MFGE8	ES	8	7	9.1	0	0.9929	0.299	0.041	ID_32404	MFGE8	0.000293607	0.00390377	0.000193984	0.0785602
ID_85610	VPS28	AD	3.4	3.3	3.7	0	1	0.0717	0.009	ID_85610	VPS28	0.000293854	24866900000000	1.39379e+06	4.44e+20
ID_79568	PPIA	ES	2.1:2.2	1	3	0	1	0.0859	0.0095	ID_79568	PPIA	0.000294606	3800850000000	587211	2.46018e+19
ID_88774	DMD	ES	76:77:78	74	79	0	0.8147	0.6943	0.0544	ID_88774	DMD	0.00029889	0.0168603	0.00184438	0.154128
ID_89373	KIF4A	AT	32	NA	NA	0	0.9976	0.9327	0.2377	ID_89373	KIF4A	0.00029954	7.2525	2.47766	21.2292
ID_89372	KIF4A	AT	29	NA	NA	0	0.9976	0.9327	0.2377	ID_89372	KIF4A	0.00029955	0.137884	0.0471052	0.403608
ID_87824	CRAT	AT	4.2	NA	NA	0	1	0.1583	0.0202	ID_87824	CRAT	0.000302673	393629	362.987	4.26858e+08
ID_87825	CRAT	AT	16	NA	NA	0	1	0.1583	0.0202	ID_87825	CRAT	0.000303029	2.54e-06	2.34e-09	0.00275745
ID_33383	IL32	RI	1.6:1.7	1.5	1.8	0	0.9976	0.646	0.1113	ID_33383	IL32	0.000303835	22.9264	4.18971	125.454
ID_35745	CLN3	ES	4	3.4	5	0	0.9857	0.1024	0.0147	ID_35745	CLN3	0.000308325	1.35e-09	2.06e-14	8.89e-05
ID_22940	RAP1B	ES	5	4	6	0	0.9715	0.0355	0.003	ID_22940	RAP1B	0.000309175	2.75e-31	6.84e-48	1.1e-14
ID_32917	C16orf13	ES	3	2	5	0	1	0.5621	0.0921	ID_32917	C16orf13	0.000309902	0.0422682	0.00757521	0.235848
ID_29546	INF2	AT	23	NA	NA	0	1	0.4331	0.0637	ID_29546	INF2	0.000312196	0.0151443	0.00155195	0.147781
ID_29545	INF2	AT	5.2	NA	NA	0	1	0.4331	0.0637	ID_29545	INF2	0.000312222	66.0304	6.76661	644.343
ID_49344	POLR2I	ES	2	1.2	3	0	1	0.0486	0.0062	ID_49344	POLR2I	0.000315781	2.55e-19	1.95e-29	3.34e-09
ID_44558	ARHGAP28	AP	NA	NA	NA	0	1	0.8604	0.1931	ID_44558	ARHGAP28	0.000326084	4.08471	1.89599	8.80007
ID_85709	KANK1	AP	4	NA	NA	0	0.7506	0.925	0.2353	ID_85709	KANK1	0.000333559	4.4805	1.97474	10.1658
ID_48586	TMEM161A	ES	5.1:5.2:6	4	7	0	1	0.041	0.0069	ID_48586	TMEM161A	0.000334053	9.54e-19	1.36e-28	6.69e-09
ID_52630	IAH1	AT	9	NA	NA	0	1	0.2715	0.0426	ID_52630	IAH1	0.00033533	0.000160133	1.35e-06	0.019
ID_52631	IAH1	AT	7.2	NA	NA	0	1	0.2715	0.0426	ID_52631	IAH1	0.000335449	6242.99	52.6182	740712
ID_7359	NBPF12	ES	12.2:13:14:15:16:17.1	12.1	17.2	0	0.9097	0.7376	0.1149	ID_7359	NBPF12	0.000341842	0.0418509	0.00736891	0.237688
ID_14200	PPFIBP2	AP	8	NA	NA	0	0.7886	0.9077	0.114	ID_14200	PPFIBP2	0.000345739	17.1451	3.61552	81.3032
ID_48195	SMIM7	ES	00:05:06.100000	2	7.1	0	0.9952	0.4549	0.0723	ID_48195	SMIM7	0.00034998	62.912	6.49597	609.288
ID_28383	ABCD4	ES	6	5	7	0	0.9762	0.181	0.0261	ID_28383	ABCD4	0.000352029	3.16e-05	1.07e-07	0.00928488
ID_17481	IL18BP	RI	1.7	1.6	1.8	0	0.7743	0.9091	0.224	ID_17481	IL18BP	0.000352129	4.80169	2.03085	11.353
ID_29533	C14orf2	ES	03:05:00	2	7.1	1	0.8812	0.8905	0.1939	ID_29533	C14orf2	0.000352541	6.32698	2.30004	17.4043
ID_33354	HCFC1R1	ES	2	1.5	3.2	0	1	0.483	0.0627	ID_33354	HCFC1R1	0.000353369	0.0152783	0.0015412	0.151458
ID_37520	IST1	ES	7:8:9:10	6	11	0	0.9929	0.0146	0.0007	ID_37520	IST1	0.000358703	1.73e-113	2.04e-175	1.47e-51
ID_49374	ZNF146	ES	2	1	3	0	0.8527	0.7594	0.1243	ID_49374	ZNF146	0.000358724	20.3084	3.88591	106.135
ID_41171	RPL27	AP	2	NA	NA	0	1	0.0742	0.008	ID_41171	RPL27	0.000358994	2.42e-14	8.05e-22	7.28e-07
ID_44214	ANAPC11	AD	3.4	3.3	6	0	1	0.3639	0.0619	ID_44214	ANAPC11	0.000363026	205.318	10.9981	3833.01
ID_23706	SOCS2	AP	4.1	NA	NA	0	0.8005	0.7899	0.1159	ID_23706	SOCS2	0.000369174	14.5192	3.33002	63.3047
ID_87657	TOR2A	AD	3.2:3.3	3.1	3.5	0	0.9216	0.8608	0.2531	ID_87657	TOR2A	0.000380984	0.261594	0.124843	0.548142
ID_13429	UROS	AT	11	NA	NA	0	1	0.0763	0.0126	ID_13429	UROS	0.000384981	1.5e-10	5.64e-16	3.97e-05
ID_21974	ITGB7	ES	11:12:13	10	14	0	0.9881	0.0272	0.0016	ID_21974	ITGB7	0.000385104	1.49e-45	2.66e-70	8.35e-21
ID_1077	GALE	ES	3	2	4	1	0.7791	0.2825	0.0466	ID_1077	GALE	0.000387682	0.00434595	0.000215502	0.0876431
ID_59644	CTSA	RI	1.2:1.3	1.1	1.4	0	0.9739	0.0852	0.0134	ID_59644	CTSA	0.000388629	1672638706	13422	208442000000000
ID_59044	ACSS2	ES	4:5.1:6:7:8:10:11:12:13:14:15	3	16	0	0.9929	0.0995	0.0111	ID_59044	ACSS2	0.000389548	1.32e-09	1.65e-14	0.000106574
ID_23865	IKBIP	AT	4	NA	NA	0	1	0.5477	0.0944	ID_23865	IKBIP	0.000389636	0.039985	0.0067507	0.236834
ID_23864	IKBIP	AT	3	NA	NA	0	1	0.5477	0.0944	ID_23864	IKBIP	0.00038971	25.0083	4.22217	148.126
ID_47667	TMEM205	ES	2.3:2.5	2.2	2.6	0	1	0.118	0.0148	ID_47667	TMEM205	0.000393803	103517306	3825.3	2801310000000
ID_75989	CDKN1A	AD	2.2	2.1	4	0	0.9335	0.3065	0.0394	ID_75989	CDKN1A	0.00039786	938.45	21.2518	41440.6
ID_20603	MGST1	AP	2	NA	NA	0	0.9952	0.1814	0.0158	ID_20603	MGST1	0.000399268	3.12e-07	7.8e-11	0.00124568
ID_87918	AIF1L	ES	8.2:8.3:9.1	8.1	9.2	0	0.9667	0.0121	0.0006	ID_87918	AIF1L	0.000399995	1.08e-135	2.04e-210	5.72e-61
ID_85559	HSF1	ES	10	9	11	0	1	0.5169	0.0793	ID_85559	HSF1	0.00040004	0.0131303	0.00119249	0.144577
ID_71449	ZDHHC11	AT	13.2	NA	NA	0	0.9691	0.9222	0.1742	ID_71449	ZDHHC11	0.000400779	0.134189	0.0441275	0.408062
ID_18600	ACAT1	AT	13	NA	NA	0	1	0.0705	0.0048	ID_18600	ACAT1	0.000401528	6.75e-24	9.94e-37	4.59e-11
ID_69259	OCIAD2	ES	3	2	4.1	1	0.9477	0.3759	0.0302	ID_69259	OCIAD2	0.000412708	5.27e-05	2.23e-07	0.0124747
ID_48587	TMEM161A	ES	5.2:6	4	7	0	0.7577	0.7755	0.1602	ID_48587	TMEM161A	0.000417054	0.129873	0.0418007	0.403508
ID_43807	AFMID	ES	7:8:9:10	6	12	0	0.9929	0.4471	0.0794	ID_43807	AFMID	0.000424557	0.00364961	0.000160899	0.0827827
ID_70281	HADH	AP	NA	NA	NA	0	0.9952	0.0383	0.0027	ID_70281	HADH	0.000428279	1.2e-47	9.25e-74	1.55e-21
ID_70280	HADH	AP	2.1	NA	NA	0	0.9952	0.0383	0.0027	ID_70280	HADH	0.000428279	8.36e+46	6.46e+20	1.08e+73
ID_61457	FAM211B	ES	4	3	5	0	1	0.6573	0.1169	ID_61457	FAM211B	0.000430828	0.0847315	0.0214411	0.334844
ID_13401	LHPP	AT	6	NA	NA	0	1	0.2798	0.0396	ID_13401	LHPP	0.000434408	461.576	15.1367	14075.2
ID_13400	LHPP	AT	8	NA	NA	0	1	0.2798	0.0396	ID_13400	LHPP	0.000434933	0.00216742	7.11e-05	0.0660975
ID_18050	ANKRD42	AT	6.2	NA	NA	0	1	0.7966	0.1547	ID_18050	ANKRD42	0.000435143	6.74	2.32791	19.5143
ID_52136	EPN1	AP	NA	NA	NA	0	0.9834	0.9265	0.1093	ID_52136	EPN1	0.000444303	27.5427	4.32946	175.218
ID_52137	EPN1	AP	2	NA	NA	0	0.9834	0.9265	0.1093	ID_52137	EPN1	0.000444339	0.0363081	0.00570731	0.230981
ID_67987	MAP3K13	AT	18	NA	NA	0	1	0.4931	0.0977	ID_67987	MAP3K13	0.000448637	0.0318996	0.00465836	0.218443
ID_39039	TP53	ES	10.1:10.2	9	11	0	0.8765	0.2848	0.036	ID_39039	TP53	0.000449006	4470.3	40.8978	488623
ID_76257	DNPH1	RI	3.2	3.1	3.3	0	1	0.2793	0.0438	ID_76257	DNPH1	0.000464015	661.33	17.4315	25090.1
ID_99316	AFMID	ES	8:9:10:11.1:12	6	13	1	0.9739	0.8999	0.1697	ID_99316	AFMID	0.000464547	0.148085	0.0508232	0.431482
ID_72145	PDE4D	AT	8.2	NA	NA	0	0.9976	0.5158	0.0505	ID_72145	PDE4D	0.000465774	78.6161	6.82268	905.875
ID_67990	MAP3K13	AT	3.2	NA	NA	0	1	0.5036	0.0985	ID_67990	MAP3K13	0.000471552	30.5351	4.49236	207.55
ID_66806	ACAD11	AT	11.2	NA	NA	0	0.9929	0.5422	0.0432	ID_66806	ACAD11	0.000472846	241.704	11.1435	5242.58
ID_66805	ACAD11	AT	20	NA	NA	0	0.9929	0.5422	0.0432	ID_66805	ACAD11	0.000472846	0.0041373	0.000190746	0.0897383
ID_7731	S100A13	AP	6	NA	NA	0	0.9952	0.8436	0.1492	ID_7731	S100A13	0.000474075	7.05443	2.35858	21.0995
ID_25012	OGFOD2	AA	8.2	6.2	8.3	0	0.9857	0.5039	0.0929	ID_25012	OGFOD2	0.000480874	40.3295	5.06083	321.384
ID_29496	XRCC3	AT	12	NA	NA	0	1	0.4795	0.0897	ID_29496	XRCC3	0.000484491	156.875	9.16762	2684.44
ID_89836	TSC22D3	AP	4	NA	NA	0	0.9667	0.5662	0.0613	ID_89836	TSC22D3	0.000484634	0.00978466	0.000727377	0.131623
ID_29495	XRCC3	AT	8	NA	NA	0	1	0.4795	0.0897	ID_29495	XRCC3	0.000484692	0.00637509	0.000372539	0.109094
ID_25215	SFSWAP	ES	12	11	13	1	0.7743	0.269	0.0495	ID_25215	SFSWAP	0.00048509	8160.18	51.7836	1.2859e+06
ID_24446	VPS29	ES	3.1	1	5	0	1	0.7083	0.1497	ID_24446	VPS29	0.000486833	8.56367	2.56193	28.6254
ID_82332	FASTK	RI	5.1	5.9	5.11	0	1	0.1753	0.0237	ID_82332	FASTK	0.000486983	269737	239.357	3.03974e+08
ID_2784	POMGNT1	RI	22.2	22.1	22.3	0	1	0.2035	0.0176	ID_2784	POMGNT1	0.000489259	6.1e-08	5.37e-12	0.000693704
ID_44762	ANKRD30B	AT	42	NA	NA	0	0.9952	0.6963	0.0885	ID_44762	ANKRD30B	0.000489301	23.7179	4.00015	140.63
ID_44760	ANKRD30B	AT	31	NA	NA	0	0.9952	0.6963	0.0885	ID_44760	ANKRD30B	0.000489301	0.0421622	0.00711087	0.24999
ID_82019	NDUFB2	AP	5	NA	NA	0	1	0.0208	0.0036	ID_82019	NDUFB2	0.000496891	1.02e+33	270080000000000	3.88e+51
ID_88577	TXLNG	ES	02:03:00	1	4	0	0.8741	0.0381	0.0027	ID_88577	TXLNG	0.000499353	3.37e-30	8.59e-47	1.32e-13
ID_2694	PRDX1	AD	1.2	1.1	2.1	0	1	0.0283	0.0037	ID_2694	PRDX1	0.000501703	1.24e+30	13948500000000	1.11e+47
ID_42832	RPS6KB1	AA	17.1	16	17.2	0	1	0.042	0.0041	ID_42832	RPS6KB1	0.000507595	2.1e-24	9.45e-38	4.69e-11
ID_56794	CFLAR	AT	17	NA	NA	0	1	0.4196	0.0756	ID_56794	CFLAR	0.000510319	0.0152788	0.00144532	0.161515
ID_79092	WIPF3	AT	9	NA	NA	0	0.9905	0.1903	0.0197	ID_79092	WIPF3	0.000511528	8.58e-06	1.19e-08	0.00618502
ID_79093	WIPF3	AT	8.2	NA	NA	0	0.9905	0.1903	0.0197	ID_79093	WIPF3	0.000511704	116558	161.641	8.40489e+07
ID_88461	MID1	AP	3.1	NA	NA	0	0.7696	1	0.2414	ID_88461	MID1	0.000518898	0.257626	0.119778	0.55412
ID_74649	NOP16	AA	5.1:5.2	4.1	5.3	0	1	0.3932	0.0614	ID_74649	NOP16	0.000521326	239.952	10.8538	5304.76
ID_11153	ARHGAP12	ES	08:09:00	7	10	0	0.8147	0.4747	0.0798	ID_11153	ARHGAP12	0.000521949	0.0205656	0.0022916	0.184562
ID_36429	FTO	ES	3	2	4	0	0.9097	0.1764	0.0138	ID_36429	FTO	0.000522965	1.7e-07	2.53e-11	0.00113508
ID_43794	AFMID	ES	9:10:11.1:11.2	8	12	1	0.9905	0.9374	0.2464	ID_43794	AFMID	0.000523619	0.223017	0.0955181	0.520702
ID_73361	SKP1	ES	3	1	4	0	1	0.0726	0.009	ID_73361	SKP1	0.000524528	2609560000000	250652	2.71684e+19
ID_85456	EEF1D	ES	00:04:08.100000	1	8.2	0	1	0.1758	0.0268	ID_85456	EEF1D	0.000528912	37650.2	97.2753	1.45725e+07
ID_29539	ASPG	ES	14	13	15	0	0.7625	0.7807	0.1584	ID_29539	ASPG	0.00052928	0.106138	0.0298492	0.377403
ID_68617	MFSD10	AA	6.1	5.2	6.2	0	0.9976	0.5497	0.0675	ID_68617	MFSD10	0.000529831	266.154	11.3096	6263.55
ID_57397	FN1	ES	33	32	34	0	0.9976	0.9187	0.2007	ID_57397	FN1	0.000530582	4.57895	1.93636	10.8279
ID_54072	MOGS	ES	2	1.3	3.1	0	0.9857	0.4172	0.0312	ID_54072	MOGS	0.0005386	0.00293656	0.000108091	0.0797793
ID_3796	BCAR3	AP	4	NA	NA	0	0.9074	0.6756	0.0914	ID_3796	BCAR3	0.000539456	18.1173	3.51159	93.4726
ID_29058	IFI27L1	ES	7.1	6	8	0	1	0.1848	0.0222	ID_29058	IFI27L1	0.000542502	2.57e-06	1.74e-09	0.00377918
ID_44878	OSBPL1A	AT	5	NA	NA	0	1	0.1727	0.0234	ID_44878	OSBPL1A	0.000554824	236175	210.443	2.65052e+08
ID_44880	OSBPL1A	AT	32	NA	NA	0	1	0.1727	0.0234	ID_44880	OSBPL1A	0.000557265	4.25e-06	3.79e-09	0.00477326
ID_21020	BICD1	AT	1.5	NA	NA	0	0.9786	0.912	0.2705	ID_21020	BICD1	0.000557989	3.05297	1.61975	5.75435
ID_21019	BICD1	AT	10	NA	NA	0	0.9786	0.912	0.2705	ID_21019	BICD1	0.000558019	0.327552	0.173783	0.617381
ID_61069	CLDN5	AP	NA	NA	NA	0	0.8266	0.149	0.0293	ID_61069	CLDN5	0.000558863	25167.5	79.6711	7.95021e+06
ID_61068	CLDN5	AP	2.1	NA	NA	0	0.8266	0.149	0.0293	ID_61068	CLDN5	0.000558873	3.97e-05	1.26e-07	0.0125513
ID_3356	GADD45A	ES	2	1	3	0	0.9952	0.0632	0.0078	ID_3356	GADD45A	0.000583207	9.06e-18	1.76e-27	4.67e-08
ID_48191	SMIM7	ES	6.1	5	7.1	0	1	0.0838	0.013	ID_48191	SMIM7	0.000586887	5058831107	14833.5	1725260000000000
ID_15674	DDB2	ES	4:5:6:7	3	8	0	1	0.1488	0.0197	ID_15674	DDB2	0.000591029	1.06e-06	4.16e-10	0.00271783
ID_82807	SLC7A2	ME	9|10	8	11	0	0.7791	1	0.1908	ID_82807	SLC7A2	0.000592121	5.25444	2.03905	13.5402
ID_64022	ACAA1	ES	6	5	7	0	1	0.3593	0.039	ID_64022	ACAA1	0.000592827	0.0012931	2.91e-05	0.0575116
ID_18637	RDX	ES	5	4	6	0	0.8527	0.0652	0.0066	ID_18637	RDX	0.000596318	1.23e-13	5.26e-21	2.89e-06
ID_46920	LONP1	RI	1.3:1.4:1.5	1.2	1.6	0	0.9192	0.1011	0.0107	ID_46920	LONP1	0.000596905	1.38e-09	1.2e-14	0.000157692
ID_48609	RFXANK	AA	4.1	3	4.2	0	1	0.6071	0.0786	ID_48609	RFXANK	0.000600737	0.0213386	0.00237017	0.192112
ID_41799	TMUB2	ES	4.4:4.5:4.8	4.3	5	0	0.8599	0.7359	0.0819	ID_41799	TMUB2	0.000606435	0.0553257	0.0105766	0.289407
ID_76330	VEGFA	ES	8.1:8.2	6	9.1	0	0.9952	0.6781	0.0939	ID_76330	VEGFA	0.000606855	22.7388	3.81201	135.638
ID_89278	FAM104B	AT	4.2	NA	NA	0	1	0.5879	0.1042	ID_89278	FAM104B	0.000613324	19.3963	3.55598	105.799
ID_89277	FAM104B	AT	5	NA	NA	0	1	0.5879	0.1042	ID_89277	FAM104B	0.000613512	0.0515602	0.00945271	0.281237
ID_390895	ACY1	ES	8.1:11:12	7.2	15	1	0.9881	0.0391	0.0033	ID_390895	ACY1	0.000626752	1.3e+34	365220000000000	4.64e+53
ID_24866	RNF34	AT	7.2	NA	NA	0	1	0.411	0.0678	ID_24866	RNF34	0.000632625	100.215	7.1333	1407.92
ID_24867	RNF34	AT	8	NA	NA	0	1	0.411	0.0678	ID_24867	RNF34	0.000632755	0.00997927	0.000710322	0.140198
ID_34360	ACSM2B	ES	2.1:2.2:3	1	4	0	0.9881	0.8393	0.1799	ID_34360	ACSM2B	0.000636494	6.99219	2.29059	21.3442
ID_13684	HRAS	RI	7.2	7.1	7.3	0	1	0.4079	0.0588	ID_13684	HRAS	0.000637713	97.7236	7.04528	1355.5
ID_75228	CDYL	AP	NA	NA	NA	0	0.9952	0.0094	0.0006	ID_75228	CDYL	0.000639169	3.52e+148	1.89e+63	6.56e+233
ID_31621	STOML1	ES	8.1:8.2	7	9	0	1	0.5433	0.0755	ID_31621	STOML1	0.000639177	0.0278443	0.00356431	0.217519
ID_33529	NAA60	AD	10.4	10.3	10.6	0	0.9762	0.5597	0.0765	ID_33529	NAA60	0.000641685	45.3918	5.07613	405.902
ID_235594	ITIH3	ES	16	14	17	1	0.8717	0.8564	0.1807	ID_235594	ITIH3	0.00064351	0.171868	0.0625088	0.472552
ID_46457	MUM1	ES	5.1:5.2	4	6	0	0.8789	1	0.1715	ID_46457	MUM1	0.000647129	6.57992	2.22883	19.4251
ID_66056	PHLDB2	AP	6	NA	NA	0	0.9929	0.0724	0.0041	ID_66056	PHLDB2	0.000647376	3.20826e+19	1.98506e+08	5.19e+30
ID_23953	ARL1	ES	3	1	5	0	0.9905	0.1312	0.0114	ID_23953	ARL1	0.000647398	3.94536e+19	2.16746e+08	7.18e+30
ID_83131	DPYSL2	AP	2	NA	NA	0	0.7815	0.5403	0.0665	ID_83131	DPYSL2	0.000647733	0.0212832	0.00232952	0.194449
ID_65631	PDZRN3	AT	7	NA	NA	0	0.8646	0.0071	0.0004	ID_65631	PDZRN3	0.00065153	3.23e+221	1.45e+94	Inf
ID_65632	PDZRN3	AT	14	NA	NA	0	0.8646	0.0071	0.0004	ID_65632	PDZRN3	0.00065153	3.1e-222	0	6.88e-95
ID_18302	SMCO4	AA	4.1	3.2	4.2	0	0.9976	0.4131	0.0624	ID_18302	SMCO4	0.000655968	73.8842	6.21914	877.755
ID_19280	TMEM218	AD	4.3:4.4	4.2	5.2	0	0.9192	1	0.1474	ID_19280	TMEM218	0.000657838	8.53047	2.48508	29.2824
ID_16435	NXF1	RI	11.2	11.1	11.3	0	1	0.8541	0.1458	ID_16435	NXF1	0.000657864	0.13356	0.0419407	0.425322
ID_85609	VPS28	AD	3.4:3.5	3.3	3.7	0	1	0.0738	0.0124	ID_85609	VPS28	0.000659475	10249244740	17779.4	5908360000000000
ID_82601	MSRA	AP	3	NA	NA	0	1	0.0974	0.0072	ID_82601	MSRA	0.000659792	2943530000000	196440	4.4107e+19
ID_101482	AFMID	ES	7:8:10:11.1:12	6	13	1	0.8361	0.7618	0.1604	ID_101482	AFMID	0.000663806	0.0966155	0.0251578	0.37104
ID_85530	GPAA1	ES	2	1	3.1	0	0.9976	0.0322	0.0056	ID_85530	GPAA1	0.000664311	1.62e-20	6.5e-32	4.02e-09
ID_7823	HAX1	ES	2.2:2.3	1	3.2	0	0.9454	0.4257	0.0526	ID_7823	HAX1	0.00066569	0.00757978	0.000455576	0.126111
ID_33403	IL32	ES	1.3:1.4:1.5:1.8:1.9	1.1	2.1	0	0.9287	0.7008	0.1467	ID_33403	IL32	0.000666732	0.12807	0.0392074	0.41834
ID_8615	APOA2	ES	2	1.1	3.2	0	0.9976	0.0169	0.002	ID_8615	APOA2	0.00066732	2.67e-53	1.39e-83	5.12e-23
ID_64487	NBEAL2	ES	00:26:27.100000	25	27.2	0	0.848	0.2433	0.0132	ID_64487	NBEAL2	0.00066774	3.54e-07	6.8e-11	0.0018402
ID_9876	2019-03-02	ES	2	1	3	0	0.962	0.1411	0.0175	ID_9876	2019-03-02	0.000672756	4.23395e+07	1701.42	1053610000000
ID_3355	SERBP1	AA	4.1	3	4.2	0	0.9976	0.5858	0.0548	ID_3355	SERBP1	0.000677693	0.00253594	8.07e-05	0.0796585
ID_74186	G3BP1	AP	2	NA	NA	0	0.924	0.3047	0.0328	ID_74186	G3BP1	0.000688782	1063.65	19.0059	59526.6
ID_74185	G3BP1	AP	NA	NA	NA	0	0.924	0.3047	0.0328	ID_74185	G3BP1	0.000689362	0.000940491	1.68e-05	0.0526374
ID_61745	SEC14L2	ES	4:5.1:5.2	3	6.2	0	0.9881	0.0986	0.0091	ID_61745	SEC14L2	0.000693738	6.37e-11	8.19e-17	4.96e-05
ID_38028	APRT	ES	3	2.1	4	0	1	0.0453	0.0049	ID_38028	APRT	0.000694756	1.75e-21	1.77e-33	1.73e-09
ID_31852	COMMD4	ES	4	3	5.2	0	1	0.0863	0.0146	ID_31852	COMMD4	0.00069858	2.16e-09	2.12e-14	0.000221101
ID_50989	IRF3	ES	5.1:6.1:6.2	4	7	0	0.9952	0.2298	0.0271	ID_50989	IRF3	0.000699025	0.000196381	1.41e-06	0.0273091
ID_38689	RPAIN	ES	4	3	5	0	1	0.5283	0.0669	ID_38689	RPAIN	0.0007019	0.025137	0.00298622	0.211596
ID_19947	COPS7A	ES	6	2.4	7	0	0.9786	0.1839	0.0267	ID_19947	COPS7A	0.000704774	4.04e-05	1.16e-07	0.0140634
ID_15540	DGKZ	AP	3	NA	NA	0	0.8409	0.866	0.1922	ID_15540	DGKZ	0.000710646	7.79503	2.37416	25.5933
ID_60459	CRYZL1	AA	12.1	11	12.2	0	0.9311	0.3194	0.0635	ID_60459	CRYZL1	0.000715398	134.231	7.85758	2293.07
ID_15694	NR1H3	AP	2	NA	NA	0	0.962	0.8592	0.1565	ID_15694	NR1H3	0.000719873	0.155037	0.0526327	0.456683
ID_43801	AFMID	ES	7:8:9:10:11.1:11.2	6	12	0	0.9929	0.7309	0.1723	ID_43801	AFMID	0.000725362	0.100892	0.02668	0.381525
ID_34361	ACSM2B	ES	2.2:3	1	4	0	0.7743	1	0.2319	ID_34361	ACSM2B	0.000726975	5.58272	2.05906	15.1364
ID_42793	PTRH2	ES	2.2	1	2.4	0	1	0.2786	0.0475	ID_42793	PTRH2	0.000733411	337.273	11.4995	9892.03
ID_99692	CD74	AA	10.1	4	10.2	1	0.9952	0.7244	0.1046	ID_99692	CD74	0.000739101	14.4986	3.06789	68.5197
ID_12948	NFKB2	AA	24.1	23	24.2	0	1	0.4258	0.0665	ID_12948	NFKB2	0.000739405	0.00790723	0.000475528	0.131484
ID_75226	ECI2	AA	2.1	1.1	2.2	0	0.9929	0.6006	0.0898	ID_75226	ECI2	0.0007401	0.0271845	0.0033488	0.220675
ID_90436	HAUS7	ES	12	11.2	13	0	1	0.7279	0.12	ID_90436	HAUS7	0.000741298	0.0684365	0.0144102	0.325016
ID_48727	ZNF66	AT	4.2	NA	NA	0	0.9834	0.065	0.0092	ID_48727	ZNF66	0.000746379	847951000000	98842.2	7.27443e+18
ID_48125	TPM4	AP	3	NA	NA	0	0.9715	0.7851	0.1467	ID_48125	TPM4	0.000747724	44.862	4.91558	409.434
ID_48124	TPM4	AP	NA	NA	NA	0	0.9715	0.7851	0.1467	ID_48124	TPM4	0.000747859	0.0222921	0.00244259	0.203448
ID_52520	TMEM18	AP	2	NA	NA	0	1	0.1199	0.0147	ID_52520	TMEM18	0.000748331	2.05676e+07	1151.99	367213000000
ID_52521	TMEM18	AP	NA	NA	NA	0	1	0.1199	0.0147	ID_52521	TMEM18	0.000748631	4.86e-08	2.72e-12	0.000868476
ID_22230	BLOC1S1	AP	2	NA	NA	0	1	0.1142	0.0171	ID_22230	BLOC1S1	0.000750507	3.31218e+06	535.247	20496161758
ID_22229	BLOC1S1	AP	NA	NA	NA	0	1	0.1142	0.0171	ID_22229	BLOC1S1	0.00075085	3.02e-07	4.88e-11	0.00186923
ID_10056	SNAP47	AP	2	NA	NA	0	0.9667	0.7648	0.1431	ID_10056	SNAP47	0.000755187	10.4459	2.66753	40.9055
ID_10055	SNAP47	AP	NA	NA	NA	0	0.9667	0.7648	0.1431	ID_10055	SNAP47	0.000755227	0.0957321	0.0244467	0.374882
ID_63307	FANCD2	AT	45	NA	NA	0	1	0.6061	0.1131	ID_63307	FANCD2	0.000756598	31.3583	4.22301	232.854
ID_13743	PDDC1	RI	8.4	8.3	8.5	0	1	0.1973	0.0225	ID_13743	PDDC1	0.000758548	2.59e-05	5.53e-08	0.0120974
ID_95045	CYP4F2	ES	8	7	9.1	0	0.943	0.1637	0.015	ID_95045	CYP4F2	0.000761007	7.03e-07	1.84e-10	0.00268592
ID_10166	MRPL55	ES	1.2:2.2	1.1	2.9	0	1	0.6785	0.1214	ID_10166	MRPL55	0.000765561	0.0849633	0.0202091	0.357203
ID_71873	CARD6	AT	3	NA	NA	0	1	0.7076	0.0864	ID_71873	CARD6	0.000767857	113.157	7.19769	1778.98
ID_71874	CARD6	AT	4	NA	NA	0	1	0.7076	0.0864	ID_71874	CARD6	0.000767993	0.008838	0.000562171	0.138944
ID_22343	SUOX	ES	02:03:00	1	5.2	0	1	0.3906	0.0849	ID_22343	SUOX	0.000771285	61.5645	5.57793	679.497
ID_78140	IYD	AT	6.4	NA	NA	0	1	0.8495	0.1865	ID_78140	IYD	0.000777298	4.47207	1.86697	10.7122
ID_78139	IYD	AT	7	NA	NA	0	1	0.8495	0.1865	ID_78139	IYD	0.000777411	0.223613	0.0933524	0.535636
ID_17346	MRPL21	ES	2.1	1	3	0	1	0.3441	0.0173	ID_17346	MRPL21	0.000782133	2.21e-05	4.25e-08	0.0115072
ID_68200	TNK2	AP	2	NA	NA	0	0.9359	0.4607	0.0762	ID_68200	TNK2	0.000784712	37.5382	4.52415	311.466
ID_71907	SEPP1	ES	3:4:5:6	2	7	1	0.7743	0.9309	0.2373	ID_71907	SEPP1	0.000786923	0.219251	0.0904056	0.531727
ID_46401	ATP5D	RI	4.2:4.3	4.1	4.4	0	1	0.692	0.1254	ID_46401	ATP5D	0.000788842	11.4179	2.75463	47.3274
ID_22033	PRR13	AA	4.1	3	4.2	0	1	0.1384	0.0211	ID_22033	PRR13	0.000790696	3.61e-06	2.39e-09	0.00544365
ID_82943	REEP4	ES	6	5	7	0	0.9929	0.2041	0.0267	ID_82943	REEP4	0.000793814	3.23e-05	7.69e-08	0.0135759
ID_61070	CLDN5	RI	2.2	2.1	2.3	0	0.791	0.9052	0.239	ID_61070	CLDN5	0.000795167	3.92728	1.76593	8.73392
ID_20601	MGST1	AP	3	NA	NA	0	0.9952	0.098	0.0083	ID_20601	MGST1	0.000795373	214989000000	51395.6	8.99302e+17
ID_59357	BLCAP	ES	4	1	6	0	0.9335	0.2481	0.0397	ID_59357	BLCAP	0.000815439	1024.77	17.6971	59340.4
ID_82016	NDUFB2	AP	4	NA	NA	0	1	0.0214	0.0034	ID_82016	NDUFB2	0.000821615	3.89e+35	548355000000000	2.76e+56
ID_16523	RTN3	ES	5	4	6	0	0.9929	0.0072	0.0009	ID_16523	RTN3	0.000823051	2.23e-118	2.58e-187	1.94e-49
ID_22198	PPP1R1A	ES	04:05:00	3	6	0	0.9644	0.5196	0.0384	ID_22198	PPP1R1A	0.000823868	0.00491205	0.000217943	0.110709
ID_82017	NDUFB2	AP	3	NA	NA	0	1	0.1382	0.0149	ID_82017	NDUFB2	0.00082684	4.14e-08	1.94e-12	0.000880164
ID_90546	IRAK1	ES	10.1:10.2:10.3	9	11.1	0	0.9786	0.5718	0.0675	ID_90546	IRAK1	0.000828295	0.0329242	0.00445034	0.243578
ID_20645	PLEKHA5	AT	4	NA	NA	0	1	0.6372	0.1265	ID_20645	PLEKHA5	0.000831774	0.0752127	0.0164921	0.34301
ID_60873	POFUT2	ES	8.3	8.1	8.5	0	0.8575	1	0.1755	ID_60873	POFUT2	0.000841948	0.0945463	0.0236749	0.377572
ID_61023	PEX26	ES	4	3	5	0	0.9976	0.4493	0.0785	ID_61023	PEX26	0.00084404	0.0310965	0.00405195	0.238649
ID_49415	ZNF567	AP	5.1	NA	NA	0	0.7577	0.9881	0.336	ID_49415	ZNF567	0.000849204	0.281655	0.133795	0.59292
ID_36237	BCKDK	RI	13.2	13.1	13.3	0	1	0.4416	0.0777	ID_36237	BCKDK	0.000856361	41.8393	4.65879	375.746
ID_77596	EPB41L2	ES	17:18:00	14	20.1	0	0.7815	1	0.2117	ID_77596	EPB41L2	0.000857919	0.193173	0.073468	0.507918
ID_44210	ANAPC11	ES	3.4:6	3.3	7.2	0	1	0.5399	0.097	ID_44210	ANAPC11	0.00085807	24.5708	3.74	161.423
ID_13810	CHID1	ES	12	11	13	0	1	0.1768	0.027	ID_13810	CHID1	0.000860271	6.46e-05	2.22e-07	0.0188026
ID_76612	EYS	AT	12.2	NA	NA	0	0.9691	0.7088	0.0789	ID_76612	EYS	0.000867538	14.5249	3.00732	70.1533
ID_10143	MRPL55	ES	2.2:2.5:2.6:2.8	1.1	2.9	0	0.829	0.2066	0.0416	ID_10143	MRPL55	0.000868698	3.51e-05	8.37e-08	0.014694
ID_62759	CRELD2	ES	8	7	9	0	1	0.0289	0.0043	ID_62759	CRELD2	0.000870186	5.74e-25	3.08e-39	1.07e-10
ID_46347	R3HDM4	ES	4.1	3.4	5.1	0	0.9976	0.157	0.021	ID_46347	R3HDM4	0.000879232	7.26e-06	6.81e-09	0.00774154
ID_43832	AFMID	ES	5:6:7:8:9:10:12	2	13	0	0.9192	1	0.2694	ID_43832	AFMID	0.000882519	0.29374	0.142691	0.604686
ID_101440	ACOT12	AT	15	NA	NA	0	0.9644	0.3762	0.0236	ID_101440	ACOT12	0.000884157	0.000199239	1.31e-06	0.0302517
ID_53766	LGALSL	ES	4.2	3	5	0	0.9834	0.027	0.0015	ID_53766	LGALSL	0.000885301	6.53e-74	4.68e-117	9.11e-31
ID_101441	ACOT12	AT	5.2	NA	NA	0	0.9644	0.3762	0.0236	ID_101441	ACOT12	0.000885957	5015.31	33.0174	761818
ID_83740	SMIM19	AD	2.2:2.3	2.1	3.2	0	0.9929	0.5578	0.0981	ID_83740	SMIM19	0.000895523	23.7052	3.66064	153.507
ID_50998	IRF3	ES	1.5:1.6:2	1.4	3	0	0.9192	0.6355	0.1038	ID_50998	IRF3	0.000897506	0.0837258	0.0193699	0.361902
ID_47612	SMARCA4	ES	32	31	33	0	0.9857	0.5234	0.0766	ID_47612	SMARCA4	0.000902446	0.00856559	0.000515348	0.142368
ID_57719	CHPF	AP	2	NA	NA	0	0.9857	0.3053	0.0341	ID_57719	CHPF	0.000907146	4418.02	31.0361	628907
ID_57718	CHPF	AP	NA	NA	NA	0	0.9857	0.3053	0.0341	ID_57718	CHPF	0.000907508	0.000226397	1.59e-06	0.0322288
ID_36608	KIFC3	ES	28	27	29	0	0.9976	0.3179	0.0644	ID_36608	KIFC3	0.000908065	0.0145077	0.00118987	0.176887
ID_3608	CTBS	AD	1.2	1.1	2	0	0.8599	0.3911	0.056	ID_3608	CTBS	0.000908833	123.443	7.17419	2124.02
ID_87654	TOR2A	RI	3.4	3.3	3.5	0	0.9905	0.3114	0.0545	ID_87654	TOR2A	0.000912082	163.163	8.0344	3313.52
ID_69315	FIP1L1	ES	2	1	3	0	0.8907	0.8193	0.1374	ID_69315	FIP1L1	0.000912881	0.0876418	0.0207875	0.369504
ID_38894	CLDN7	AP	NA	NA	NA	0	0.8717	0.8392	0.2112	ID_38894	CLDN7	0.000913117	4.11724	1.78376	9.50331
ID_38892	CLDN7	AP	2.1	NA	NA	0	0.8717	0.8392	0.2112	ID_38892	CLDN7	0.00091342	0.242891	0.105231	0.560635
ID_73577	SIL1	ES	2	1	4	0	0.9929	0.2308	0.0321	ID_73577	SIL1	0.000914849	8327.57	40.076	1.73042e+06
ID_50997	IRF3	AD	1.6	1.5	2	0	0.943	0.9403	0.1944	ID_50997	IRF3	0.000919336	0.192109	0.0724167	0.509632
ID_1647	RNF19B	AA	3.1	2	3.2	0	0.7862	0.5417	0.0992	ID_1647	RNF19B	0.000924617	0.0262201	0.00304063	0.226102
ID_58059	UGT1A6	AP	2.1	NA	NA	0	0.9857	0.5197	0.0433	ID_58059	UGT1A6	0.000933189	0.00375553	0.000137569	0.102523
ID_58058	UGT1A6	AP	NA	NA	NA	0	0.9857	0.5197	0.0433	ID_58058	UGT1A6	0.000933212	266.392	9.7556	7274.23
ID_35532	C16orf52	AT	5.3	NA	NA	0	1	0.5554	0.0921	ID_35532	C16orf52	0.000935768	0.0380381	0.0054866	0.263714
ID_38549	PELP1	RI	17.6	17.5	17.7	0	0.9667	0.017	0.0008	ID_38549	PELP1	0.000940206	2.35e-89	7.17e-142	7.68e-37
ID_33348	TNFRSF12A	ES	3.2	2.1	4	0	0.9929	0.1663	0.0277	ID_33348	TNFRSF12A	0.00094904	8.26e-05	3.13e-07	0.0217887
ID_32776	WASH4P	AD	5.2:5.3	5.1	6.1	1	0.8385	0.6506	0.0986	ID_32776	WASH4P	0.000961066	0.0592534	0.0110704	0.317148
ID_33783	MGRN1	ES	11:12:00	10	13	0	0.962	0.2025	0.0276	ID_33783	MGRN1	0.000964795	0.00010286	4.41e-07	0.0240027
ID_87671	FPGS	ES	7	6	8	0	1	0.0399	0.0062	ID_87671	FPGS	0.000968585	9.68e-19	1.93e-29	4.86e-08
ID_85436	EEF1D	AP	NA	NA	NA	0	1	0.274	0.0391	ID_85436	EEF1D	0.000969129	0.00121274	2.25e-05	0.065486
ID_60185	PRPF6	ES	15	14	16	0	1	0.0496	0.0067	ID_60185	PRPF6	0.000975641	2.28e-18	7.45e-29	6.99e-08
ID_21593	FAM186B	AT	8	NA	NA	0	0.8551	1	0.1328	ID_21593	FAM186B	0.000979791	7.78762	2.29813	26.3897
ID_41788	TMUB2	AD	4.6:4.7:4.8	4.5	5	0	0.9905	0.2087	0.0365	ID_41788	TMUB2	0.000986303	0.000452306	4.63e-06	0.0441815
ID_3941	FAM102B	AT	11	NA	NA	0	1	0.9211	0.1937	ID_3941	FAM102B	0.00099323	5.13889	1.93952	13.6158
ID_3940	FAM102B	AT	12	NA	NA	0	1	0.9211	0.1937	ID_3940	FAM102B	0.000993246	0.194596	0.0734446	0.515594
ID_10810	FRMD4A	AT	5	NA	NA	0	1	0.0101	0.0007	ID_10810	FRMD4A	0.00100535	8.61e+168	1.84e+68	4.03e+269
ID_66807	ACAD11	ES	00:10:11.100000	9	12	0	0.9406	0.1068	0.0128	ID_66807	ACAD11	0.00100821	4.28e-08	1.74e-12	0.00105585
ID_77160	CEP57L1	AT	15	NA	NA	0	1	0.3995	0.0751	ID_77160	CEP57L1	0.00101977	76.6463	5.75616	1020.59
ID_77161	CEP57L1	AT	10.2	NA	NA	0	1	0.3995	0.0751	ID_77161	CEP57L1	0.00101987	0.0130471	0.000979827	0.173732
ID_60871	POFUT2	AA	8.3:8.4	8.1	8.5	0	0.8456	1	0.0993	ID_60871	POFUT2	0.00102177	0.00492907	0.000206991	0.117376
ID_33387	IL32	AA	1.8	1.5	1.9	0	1	0.1672	0.0155	ID_33387	IL32	0.0010228	3.64e-11	2.14e-17	6.18e-05
ID_250	C1orf86	ES	6	5	7.1	0	1	0.4395	0.0865	ID_250	C1orf86	0.00103614	0.0211021	0.00210469	0.211575
ID_48490	C19orf60	ES	3.1:3.2	2	4	0	1	0.3326	0.0425	ID_48490	C19orf60	0.00104702	0.00929711	0.00056681	0.152496
ID_87053	TGFBR1	ES	4.2	3	5	0	0.7601	0.3391	0.035	ID_87053	TGFBR1	0.00104777	0.00138425	2.7e-05	0.0709334
ID_57983	DIS3L2	AT	25	NA	NA	0	1	0.3051	0.0463	ID_57983	DIS3L2	0.00105471	385.382	10.9288	13589.6
ID_15870	SERPING1	ES	00:05:06.200000	4	7.1	0	1	0.0028	0.0004	ID_15870	SERPING1	0.00105624	1.89e-269	0	1.24e-108
ID_81345	DUS4L	ES	5.1	4	6	0	0.8836	0.5393	0.1029	ID_81345	DUS4L	0.00105979	31.0577	3.97129	242.889
ID_24444	VPS29	ES	3.1:3.2	1	5	0	1	0.1932	0.0317	ID_24444	VPS29	0.00106183	13527.5	45.4768	4.02388e+06
ID_85066	WDYHV1	AD	1.2	1.1	2	0	0.8884	0.4824	0.1026	ID_85066	WDYHV1	0.00106541	0.0442234	0.00683198	0.286258
ID_27684	ACTR10	ES	2	1	4	0	0.9644	0.0863	0.0086	ID_27684	ACTR10	0.00107113	4.56e-11	2.9e-17	7.16e-05
ID_39439	CCDC144A	AT	19.2	NA	NA	0	1	0.3945	0.0464	ID_39439	CCDC144A	0.00108526	0.000838824	1.2e-05	0.0587488
ID_2852	CYP4A11	ES	9.1:9.2:9.3:9.4:10	7.2	11.1	0	0.9667	0.509	0.0826	ID_2852	CYP4A11	0.00108757	0.0359467	0.00488781	0.264364
ID_87751	ODF2	AP	3	NA	NA	0	0.8219	0.1324	0.0099	ID_87751	ODF2	0.00108923	10204100000000	159597	6.52e+20
ID_16855	SCYL1	RI	17.2	17.1	17.3	0	1	0.2292	0.0371	ID_16855	SCYL1	0.00109183	1514.53	18.6895	122733
ID_148	AURKAIP1	RI	1.3:1.4	1.2	1.5	0	0.9905	0.6935	0.1475	ID_148	AURKAIP1	0.00110907	8.51419	2.35043	30.8418
ID_69059	RPL9	AP	2.1	NA	NA	0	1	0.1284	0.0148	ID_69059	RPL9	0.0011144	4.34227e+06	443.535	42511478577
ID_69058	RPL9	AP	NA	NA	NA	0	1	0.1284	0.0148	ID_69058	RPL9	0.00111489	2.3e-07	2.35e-11	0.00225556
ID_43811	AFMID	ES	8	6	12	1	0.9834	0.6954	0.1482	ID_43811	AFMID	0.00111572	7.09301	2.18391	23.037
ID_44854	TTC39C	AT	18	NA	NA	0	1	0.8135	0.1422	ID_44854	TTC39C	0.00111582	0.190729	0.0704264	0.516534
ID_44853	TTC39C	AT	4	NA	NA	0	1	0.8135	0.1422	ID_44853	TTC39C	0.0011159	5.24299	1.93596	14.1991
ID_81428	IMMP2L	AD	1.2	1.1	2.2	0	0.9287	0.0328	0.0025	ID_81428	IMMP2L	0.00112455	3.16e+28	224635000000	4.45e+45
ID_19657	ERC1	ES	16	15	17	0	0.7862	0.2632	0.0343	ID_19657	ERC1	0.00112717	0.000264398	1.86e-06	0.0376214
ID_81873	C7orf49	AD	2.3:2.4	2.2	3	0	0.9192	1	0.2568	ID_81873	C7orf49	0.00112796	0.295405	0.141802	0.615394
ID_17092	RBM4	AT	3.3	NA	NA	0	1	0.0811	0.0128	ID_17092	RBM4	0.0011307	1.38e-11	4.01e-18	4.76e-05
ID_87670	FPGS	ES	11	10	12	0	0.9976	0.472	0.0528	ID_87670	FPGS	0.00113556	0.0160377	0.00133122	0.193212
ID_67871	PSMD2	AD	1.2	1.1	2	0	0.9216	0.1878	0.0199	ID_67871	PSMD2	0.00113634	119250	104.509	1.36069e+08
ID_41795	TMUB2	AD	4.4:4.5:4.6:4.7:4.8	4.3	5	0	0.9834	0.0935	0.0081	ID_41795	TMUB2	0.00114076	2.99e-11	1.37e-17	6.55e-05
ID_13679	RNH1	AA	4.2	1	4.3	0	0.9929	0.6599	0.1151	ID_13679	RNH1	0.00114782	15.4327	2.96532	80.3177
ID_19859	TAPBPL	ES	2	1	3	0	0.9834	0.0945	0.0071	ID_19859	TAPBPL	0.00114939	8.6e-13	4.58e-20	1.62e-05
ID_13555	PAOX	ES	7	6	8	0	0.9976	0.595	0.0752	ID_13555	PAOX	0.00115291	0.0415573	0.00610482	0.282893
ID_85690	CBWD1	ES	11	10	12	0	0.9644	0.865	0.2154	ID_85690	CBWD1	0.00115545	3.80621	1.69973	8.52324
ID_38304	CRK	ES	2.2:3.1	2.1	3.2	0	0.962	0.0194	0.0016	ID_38304	CRK	0.00116098	4.7e-69	2.78e-110	7.94e-28
ID_46795	MPND	ES	11.1:11.2	10	12	0	0.7648	1	0.2721	ID_46795	MPND	0.0011655	0.274734	0.125964	0.599208
ID_43814	AFMID	ES	5:6:7:8:9:10:11.1:11.2:12	2	13	0	0.9644	0.9927	0.2664	ID_43814	AFMID	0.00117668	0.335211	0.173207	0.64874
ID_59077	EIF6	ES	2.4:3	2.2	4	0	1	0.0069	0.0012	ID_59077	EIF6	0.00118533	1.15e-96	1.17e-154	1.13e-38
ID_37707	CMC2	ME	6|7	5	9	0	0.8931	0.3435	0.0645	ID_37707	CMC2	0.00118601	80.0839	5.66016	1133.08
ID_59010	NECAB3	AA	3.1	2	3.2	0	0.8931	0.04	0.0024	ID_59010	NECAB3	0.00119056	7.12e-30	1.68e-47	3.01e-12
ID_8611	APOA2	AD	1.2	1.1	2	0	0.9976	0.0188	0.0022	ID_8611	APOA2	0.00119104	2.6e+49	3.40477e+19	1.99e+79
ID_30882	POLR2M	AD	13.2	13.1	14.1	0	0.7862	0.3394	0.0439	ID_30882	POLR2M	0.00119643	364.452	10.2779	12923.4
ID_89238	FAM120C	AT	17	NA	NA	0	1	0.9323	0.2055	ID_89238	FAM120C	0.00120068	0.241471	0.102187	0.570604
ID_89237	FAM120C	AT	2	NA	NA	0	1	0.9323	0.2055	ID_89237	FAM120C	0.00120112	4.14109	1.75245	9.78553
ID_48256	BABAM1	ES	04:05:06	3	8	0	1	0.0433	0.008	ID_48256	BABAM1	0.00120356	2.7e-16	1.02e-25	7.16e-07
ID_60412	IFNGR2	ES	2.1:2.2:3	1	4	0	0.8812	0.0873	0.0145	ID_60412	IFNGR2	0.00120873	117941703	1527.88	9104280000000
ID_18328	MED17	AT	12.2	NA	NA	0	1	0.3645	0.0529	ID_18328	MED17	0.00121473	243.198	8.72118	6781.77
ID_18327	MED17	AT	2.2	NA	NA	0	1	0.3645	0.0529	ID_18327	MED17	0.00121493	0.00411243	0.000147478	0.114675
ID_19830	TNFRSF1A	ES	3.2:4.1	3.1	4.2	0	1	0.0018	0.0001	ID_19830	TNFRSF1A	0.0012238	0	0	1.02913874028732e-320
ID_253	MORN1	AT	17	NA	NA	0	0.9097	1	0.2805	ID_253	MORN1	0.00122387	0.351396	0.186408	0.662414
ID_45649	NEDD4L	AP	6	NA	NA	0	0.9952	0.916	0.2324	ID_45649	NEDD4L	0.0012251	3.23725	1.58813	6.59882
ID_33662	CORO7	AT	7.2	NA	NA	0	1	0.0327	0.002	ID_33662	CORO7	0.00123651	1.62e+31	1877520000000	1.4e+50
ID_15871	SERPING1	ES	3.1:3.2	2.2	4	0	0.9216	1	0.1315	ID_15871	SERPING1	0.00123767	0.13537	0.0402288	0.455518
ID_116361	ATOX1	ES	6.1	2	6.3	1	0.7815	0.6216	0.1041	ID_116361	ATOX1	0.00123886	38.3451	4.1942	350.567
ID_26864	PSME2	AA	3.1	2	3.2	0	1	0.2708	0.0437	ID_26864	PSME2	0.00124499	283.979	9.20194	8763.84
ID_67216	CP	ES	11	10	12	0	0.9952	0.1777	0.0161	ID_67216	CP	0.00124878	1.45e-05	1.68e-08	0.0125977
ID_206708	KHK	ES	4	3	5	1	0.943	0.9137	0.2401	ID_206708	KHK	0.00125642	0.250586	0.108084	0.580965
ID_16601	VEGFB	AA	6.1	5	6.2	0	0.9952	0.5178	0.0867	ID_16601	VEGFB	0.00125664	47.9352	4.56536	503.309
ID_84266	MRPS28	ES	4.1:4.2	1	5	0	1	0.2577	0.0266	ID_84266	MRPS28	0.00126235	0.0005754	6.17e-06	0.053633
ID_22340	SUOX	ES	3	2	5.2	0	1	0.6139	0.1525	ID_22340	SUOX	0.00126714	7.63445	2.21819	26.2759
ID_34120	PDXDC1	ES	7.2:8:9:10:11:12:13:14:15:16:17:18.1:19:20:21	7.1	22	0	0.9739	0.0348	0.0036	ID_34120	PDXDC1	0.00126887	8.83e-26	5.12e-41	1.52e-10
ID_2066	FOXJ3	AP	3	NA	NA	0	0.8907	0.0383	0.002	ID_2066	FOXJ3	0.00127816	2.02e+38	989351000000000	4.11e+61
ID_68395	MFSD7	ES	04:05:00	3.2	6	0	0.8314	0.7078	0.1357	ID_68395	MFSD7	0.00128262	0.114082	0.0304321	0.427665
ID_50411	TRAPPC6A	ES	2	1.1	3	0	1	0.4498	0.0696	ID_50411	TRAPPC6A	0.00128607	0.0224838	0.00223043	0.226648
ID_88463	MID1	AP	NA	NA	NA	0	0.7696	0.8905	0.1839	ID_88463	MID1	0.00129919	3.81961	1.68784	8.64387
ID_47979	GIPC1	ES	6	5	7	0	1	0.0561	0.007	ID_47979	GIPC1	0.0013002	2.07e-15	2.32e-24	1.84e-06
ID_16640	PRDX5	ES	3	1	4	1	1	0.4924	0.0862	ID_16640	PRDX5	0.00130833	0.0332335	0.00416911	0.264916
ID_22697	OS9	AA	7.3	7.1	7.4	0	0.9952	0.6358	0.0514	ID_22697	OS9	0.00131057	0.00227528	5.56e-05	0.0930985
ID_44019	GAA	AP	NA	NA	NA	0	0.8907	0.2871	0.0447	ID_44019	GAA	0.00131703	0.00338652	0.000105323	0.108889
ID_44020	GAA	AP	2.1	NA	NA	0	0.8907	0.2871	0.0447	ID_44020	GAA	0.00131744	295.258	9.18239	9493.96
ID_74158	CCDC69	AT	10	NA	NA	0	1	0.0754	0.0087	ID_74158	CCDC69	0.00131969	1.19e-12	6.26e-20	2.25e-05
ID_74159	CCDC69	AT	2	NA	NA	0	1	0.0754	0.0087	ID_74159	CCDC69	0.00132212	840214000000	44274.9	1.59449e+19
ID_76156	CCND3	AP	2	NA	NA	0	0.9929	0.9234	0.2064	ID_76156	CCND3	0.0013317	0.243164	0.102525	0.576723
ID_7491	ENSA	AP	2	NA	NA	0	1	0.1756	0.0236	ID_7491	ENSA	0.00133643	125182	96.2012	1.62894e+08
ID_7490	ENSA	AP	NA	NA	NA	0	1	0.1756	0.0236	ID_7490	ENSA	0.0013368	7.99e-06	6.14e-09	0.0103976
ID_43232	RPL38	RI	1.2:1.3	1.1	1.4	0	1	0.1489	0.0168	ID_43232	RPL38	0.00134202	779023	195.316	3107154961
ID_83140	ADRA1A	AT	7.2	NA	NA	0	1	0.6591	0.1969	ID_83140	ADRA1A	0.0013445	0.221984	0.0884584	0.557063
ID_38607	RNF167	ES	07:08:00	6	9	0	1	0.053	0.0074	ID_38607	RNF167	0.00134633	1.04e-13	1.2e-21	8.99e-06
ID_44308	CSNK1D	ES	11	10	12	0	1	0.237	0.0408	ID_44308	CSNK1D	0.00134712	0.00138763	2.48e-05	0.0775284
ID_53744	UGP2	AP	NA	NA	NA	0	0.9881	0.9473	0.207	ID_53744	UGP2	0.00135458	4.4521	1.78584	11.0991
ID_74436	CCNG1	ES	6	5	7	0	1	0.0768	0.0051	ID_74436	CCNG1	0.00135852	8.23e-13	3.32e-20	2.04e-05
ID_25526	RPL21	AD	1.3	1.2	2	0	0.9525	0.6939	0.1111	ID_25526	RPL21	0.00136217	0.0628512	0.0115579	0.34178
ID_58280	CAPN10	ES	8	7	9	0	0.9477	0.9458	0.1483	ID_58280	CAPN10	0.00136253	0.10816	0.0277268	0.421923
ID_19972	CD4	ES	3	2	4	0	0.848	0.2911	0.026	ID_19972	CD4	0.00137228	0.00100725	1.47e-05	0.0689354
ID_17323	PPP6R3	ES	4	3	5	0	0.8171	0.5487	0.059	ID_17323	PPP6R3	0.00138591	0.0147343	0.00111071	0.195461
ID_7899	ADAM15	AA	21.1	20	21.2	0	0.9549	0.9312	0.1192	ID_7899	ADAM15	0.00138845	0.0648163	0.012111	0.346887
ID_50937	ALDH16A1	ES	7	6	8	0	0.9762	0.3201	0.0477	ID_50937	ALDH16A1	0.00139353	0.00451867	0.000164789	0.123906
ID_27350	SEC23A	ES	18	17	19	0	0.867	0.1358	0.0237	ID_27350	SEC23A	0.00140194	251513	122.131	5.1796e+08
ID_52927	OST4	AA	2.1	1.3	2.2	0	1	0.0057	0.0007	ID_52927	OST4	0.00142247	2.65e+145	1.19e+56	5.91e+234
ID_55155	RALB	AA	3.1	2	3.2	0	0.8765	0.8713	0.1021	ID_55155	RALB	0.00142913	0.0400042	0.00553195	0.28929
ID_13554	FUOM	ES	3	1	4	0	1	0.0661	0.0075	ID_13554	FUOM	0.00143199	2.01e-11	5.35e-18	7.58e-05
ID_30722	CCPG1	AP	NA	NA	NA	0	0.8575	0.672	0.1088	ID_30722	CCPG1	0.00143419	0.0461127	0.00695445	0.305759
ID_30723	CCPG1	AP	2	NA	NA	0	0.8575	0.672	0.1088	ID_30723	CCPG1	0.00143442	21.6853	3.27043	143.789
ID_88351	PLCXD1	RI	8.2	8.1	8.3	0	1	0.0743	0.0049	ID_88351	PLCXD1	0.0014393	1.6e-15	1.27e-24	2.02e-06
ID_26636	MRPL52	ES	3:4.1:4.2	2	5	0	0.8955	0.2073	0.0232	ID_26636	MRPL52	0.00144634	9970.6	34.5303	2.87901e+06
ID_99284	ACSM2A	RI	7.2	7.1	7.3	0	0.9786	0.0649	0.0047	ID_99284	ACSM2A	0.00144672	7.05e+52	2.13e+20	2.33e+85
ID_80362	STEAP4	AT	4.2	NA	NA	0	1	0.9382	0.1465	ID_80362	STEAP4	0.00145074	5.07146	1.86692	13.7765
ID_80361	STEAP4	AT	6	NA	NA	0	1	0.9382	0.1465	ID_80361	STEAP4	0.00145081	0.197184	0.0725881	0.535646
ID_48608	RFXANK	ES	5	4.2	6	0	1	0.3531	0.0511	ID_48608	RFXANK	0.00145235	0.0128152	0.000876834	0.187297
ID_88941	UXT	RI	1.2	1.1	1.3	0	0.9976	0.4435	0.0514	ID_88941	UXT	0.00146731	132.851	6.53266	2701.73
ID_48446	FKBP8	AA	6.1	5	6.2	0	1	0.3194	0.046	ID_48446	FKBP8	0.00147275	0.00338669	0.000101689	0.112791
ID_10127	MRPL55	ES	2.2	1.2	2.9	0	1	0.8178	0.1666	ID_10127	MRPL55	0.00147997	0.175371	0.0599472	0.513032
ID_70148	UBE2D3	AD	2.2:2.3:2.4	2.1	3.3	0	0.9857	0.8133	0.1287	ID_70148	UBE2D3	0.00148054	0.110496	0.0284079	0.429789
ID_52072	SUV420H2	ES	3	2	4	0	0.9169	0.5025	0.0898	ID_52072	SUV420H2	0.00148618	0.0356279	0.0045547	0.278689
ID_2677	TOE1	ES	4	3	5	0	0.9026	0.1306	0.0182	ID_2677	TOE1	0.0014908	1.31e-06	3.09e-10	0.00559144
ID_70825	RPS3A	ES	2.2:3.1:3.2	1.3	4.1	0	1	0.0081	0.0014	ID_70825	RPS3A	0.0015011	5.18e+100	3.4e+38	7.89e+162
ID_25567	HMGB1	AP	NA	NA	NA	0	1	0.0177	0.0019	ID_25567	HMGB1	0.00151567	1.28e-79	2.26e-128	7.24e-31
ID_20092	PEX5	AD	2.2:2.3:2.4	2.1	3.2	0	0.8575	0.7839	0.1087	ID_20092	PEX5	0.00153772	15.817	2.86504	87.3208
ID_11062	YME1L1	ES	3.1	2	3.3	0	0.8504	0.6514	0.0568	ID_11062	YME1L1	0.00154351	30.8549	3.69354	257.754
ID_69559	NAAA	AP	NA	NA	NA	0	0.8907	0.6785	0.0847	ID_69559	NAAA	0.00154602	0.0521339	0.00837352	0.324588
ID_69560	NAAA	AP	2.1	NA	NA	0	0.8907	0.6785	0.0847	ID_69560	NAAA	0.00154602	19.1814	3.08083	119.424
ID_52774	PUM2	ES	16	15	17	0	0.9026	0.8692	0.1068	ID_52774	PUM2	0.00154916	18.1884	3.01806	109.612
ID_37872	ZDHHC7	RI	9.2	9.1	9.3	0	1	0.0628	0.0072	ID_37872	ZDHHC7	0.00155426	1.12e-12	4.46e-20	2.83e-05
ID_51010	IRF3	ES	1.4:1.5:2	1.1	3	0	0.7696	0.8511	0.1919	ID_51010	IRF3	0.00156523	0.213507	0.0819955	0.555949
ID_36009	INO80E	ES	6.1:6.2:6.3:7:8:9:10	5	11	0	0.8219	1	0.29	ID_36009	INO80E	0.00156997	0.283235	0.129569	0.619148
ID_16639	PRDX5	ES	02:03:00	1	4	0	1	0.0663	0.009	ID_16639	PRDX5	0.00157061	6.86e-12	8.22e-19	5.72e-05
ID_16586	NUDT22	ES	02:03:00	1.4	4	0	1	0.0569	0.008	ID_16586	NUDT22	0.00157953	3.93e-13	7.93e-21	1.95e-05
ID_90669	CMC4	AP	NA	NA	NA	0	1	0.5873	0.0807	ID_90669	CMC4	0.00158705	0.0866819	0.0190032	0.395393
ID_90668	CMC4	AP	2	NA	NA	0	1	0.5873	0.0807	ID_90668	CMC4	0.00158715	11.5363	2.5291	52.6223
ID_17707	RAB6A	ME	5|6	4	7	0	0.9525	0.8235	0.083	ID_17707	RAB6A	0.00159889	43.1317	4.16464	446.7
ID_41103	PLEKHH3	AD	11.2	11.1	12.2	0	0.9572	0.5622	0.0946	ID_41103	PLEKHH3	0.00160214	0.0463114	0.00686936	0.312219
ID_23712	CRADD	AP	NA	NA	NA	0	0.9786	0.0375	0.0051	ID_23712	CRADD	0.00160314	2.36e-22	8.71e-36	6.41e-09
ID_49679	EIF3K	ES	6	5	7.1	0	1	0.0557	0.0052	ID_49679	EIF3K	0.00160315	1.82e-16	3.04e-26	1.09e-06
ID_101488	AFMID	ES	7:8:10:11.1	6	12	1	0.8385	0.4308	0.0615	ID_101488	AFMID	0.00160666	0.00135753	2.25e-05	0.0820594
ID_23713	CRADD	AP	2	NA	NA	0	0.9786	0.0375	0.0051	ID_23713	CRADD	0.00161041	4.14e+21	1.52691e+08	1.12e+35
ID_84783	ATP6V1C1	ES	1.2:2:3	1.1	4	0	0.9596	0.0062	0.0004	ID_84783	ATP6V1C1	0.00161858	1.37e-185	1.61e-300	1.17e-70
ID_34131	NTAN1	ES	2	1	3	0	0.9834	0.4367	0.0794	ID_34131	NTAN1	0.00162687	62.978	4.78724	828.5
ID_52470	ZNF446	ES	5	4	6	0	0.943	0.2354	0.0326	ID_52470	ZNF446	0.00163505	0.00244029	5.78e-05	0.103091
ID_66210	NAA50	AP	3	NA	NA	0	0.9929	0.0232	0.0016	ID_66210	NAA50	0.00164124	5.02e+49	5.77195e+18	4.36e+80
ID_69358	PAICS	AP	2.1	NA	NA	0	0.924	0.297	0.0457	ID_69358	PAICS	0.00164575	0.0019864	4.13e-05	0.095605
ID_69357	PAICS	AP	NA	NA	NA	0	0.924	0.297	0.0457	ID_69357	PAICS	0.001646	503.394	10.4589	24228.7
ID_53745	UGP2	AP	2	NA	NA	0	0.9881	0.9445	0.2085	ID_53745	UGP2	0.00164906	0.233176	0.0941641	0.577407
ID_49323	SYNE4	ES	03:04:00	2	5	0	0.9359	0.3503	0.0593	ID_49323	SYNE4	0.00165259	0.0183068	0.00151488	0.221233
ID_29491	KLC1	AA	13.1	12	13.2	0	0.9976	0.327	0.0561	ID_29491	KLC1	0.00165895	120.958	6.09363	2401
ID_31778	MPI	ES	5.1	4	6.1	0	0.9976	0.0693	0.0086	ID_31778	MPI	0.00165903	1.05e-13	8.58e-22	1.28e-05
ID_82577	ANGPT2	AT	8.2	NA	NA	0	1	0.4926	0.0735	ID_82577	ANGPT2	0.00166912	0.00564687	0.000223917	0.142406
ID_82578	ANGPT2	AT	9	NA	NA	0	1	0.4926	0.0735	ID_82578	ANGPT2	0.00166912	177.089	7.02219	4465.93
ID_42307	SPOP	ES	7	6	8	0	0.8789	0.5644	0.1011	ID_42307	SPOP	0.00167006	0.0256968	0.00262064	0.251972
ID_91779	HPS1	ES	9	8	10.1	1	0.8931	0.6369	0.0973	ID_91779	HPS1	0.00167033	0.0853456	0.0183967	0.395932
ID_27683	ACTR10	ES	02:03:00	1	4	0	1	0.2137	0.0312	ID_27683	ACTR10	0.00167293	0.000363011	2.6e-06	0.0507251
ID_1330	WASF2	ES	8	7	9	0	0.9857	0.0524	0.0044	ID_1330	WASF2	0.00168198	2.12e-20	1.13e-32	4e-08
ID_44265	STRA13	ES	3.1:3.2	2	4.1	0	0.9976	0.6976	0.1261	ID_44265	STRA13	0.001682	0.0838683	0.0178646	0.393733
ID_17642	ARAP1	ES	16	15	17	0	0.9644	0.3683	0.0681	ID_17642	ARAP1	0.00169787	0.023626	0.00227826	0.245006
ID_48602	MEF2BNB	AT	6.2	NA	NA	0	1	0.531	0.0782	ID_48602	MEF2BNB	0.00170882	0.043383	0.00610716	0.308176
ID_48603	MEF2BNB	AT	4.2	NA	NA	0	1	0.531	0.0782	ID_48603	MEF2BNB	0.0017089	23.0502	3.24485	163.74
ID_28998	RIN3	ES	5	4	6	0	0.81	0.4069	0.0608	ID_28998	RIN3	0.00171703	0.00550256	0.000212868	0.142239
ID_21881	GRASP	AP	NA	NA	NA	0	0.8575	0.9793	0.195	ID_21881	GRASP	0.00171815	0.278113	0.124958	0.618985
ID_21880	GRASP	AP	3	NA	NA	0	0.8575	0.9793	0.195	ID_21880	GRASP	0.00171815	3.59566	1.61555	8.0027
ID_60002	GNAS	AA	8.1	6	8.2	0	1	0.3135	0.0363	ID_60002	GNAS	0.0017261	0.00108357	1.51e-05	0.0775157
ID_15673	DDB2	ES	6	5	7	0	1	0.322	0.0383	ID_15673	DDB2	0.00174077	0.00185391	3.61e-05	0.0950834
ID_14257	RPL27A	AA	2.1	1.3	2.2	0	0.9549	0.8852	0.1293	ID_14257	RPL27A	0.00174313	0.128674	0.0356464	0.464481
ID_390168	CRELD2	ES	9	7	10	1	0.9501	0.374	0.0556	ID_390168	CRELD2	0.00174901	68.0203	4.8418	955.586
ID_9885	TAF1A	AT	12.2	NA	NA	0	0.9929	0.8495	0.16	ID_9885	TAF1A	0.00175255	5.88353	1.93903	17.8522
ID_38872	GABARAP	AD	1.2:1.3	1.1	1.5	0	1	0.0124	0.0018	ID_38872	GABARAP	0.00176111	4.57e+54	2.56e+20	8.15e+88
ID_38194	DEF8	ES	2.1	1	4	1	0.9287	0.8768	0.1515	ID_38194	DEF8	0.00176279	0.155496	0.0484381	0.499175
ID_63305	FANCD2	AT	44.2	NA	NA	0	1	0.39	0.0495	ID_63305	FANCD2	0.00176658	0.000697452	7.33e-06	0.0663775
ID_50904	TRPM4	ES	03:04:00	2	5	0	0.8124	0.5023	0.0475	ID_50904	TRPM4	0.00176809	0.0250151	0.00247801	0.252523
ID_33893	FAM86A	ES	2	1	3.1	0	0.8694	0.6848	0.123	ID_33893	FAM86A	0.00178438	11.3876	2.4753	52.3882
ID_58387	STK25	ES	4	3.2	5	0	0.981	0.096	0.0155	ID_58387	STK25	0.00179504	2.69e-07	2.01e-11	0.00358041
ID_89348	AR	AT	11	NA	NA	0	0.9976	0.3861	0.0362	ID_89348	AR	0.00182071	0.004339	0.000141994	0.13259
ID_58893	HM13	ES	00:11:12.100000	10	13	1	0.962	0.9172	0.2306	ID_58893	HM13	0.00182077	0.273905	0.121361	0.61819
ID_89349	AR	AT	6	NA	NA	0	0.9976	0.3861	0.0362	ID_89349	AR	0.00182232	230.407	7.53918	7041.53
ID_58864	ENTPD6	ES	11	10	12	0	0.9857	0.357	0.0672	ID_58864	ENTPD6	0.00182249	0.0193067	0.00161443	0.230887
ID_156231	SLC23A1	ES	13	12	14	1	0.7838	0.3062	0.0512	ID_156231	SLC23A1	0.00182986	0.00386585	0.000117459	0.127234
ID_70335	PLA2G12A	AD	2.2	2.1	3	0	0.9905	0.041	0.002	ID_70335	PLA2G12A	0.00184315	5.82e-35	1.66e-56	2.04e-13
ID_81377	DLD	AT	16	NA	NA	0	1	0.2647	0.0452	ID_81377	DLD	0.00184541	267.544	7.93607	9019.56
ID_81376	DLD	AT	15.2	NA	NA	0	1	0.2647	0.0452	ID_81376	DLD	0.00184667	0.00373889	0.000110903	0.126051
ID_9996	SRP9	ES	3	2	5	0	0.9786	0.4693	0.0803	ID_9996	SRP9	0.00185077	36.8214	3.80307	356.506
ID_60770	CBS	AP	2	NA	NA	0	0.9454	0.4255	0.0494	ID_60770	CBS	0.00186818	0.0131317	0.0008563	0.201381
ID_52064	TMEM150B	ES	5	4	6	0	0.8314	0.3299	0.056	ID_52064	TMEM150B	0.00186919	0.0050785	0.000181963	0.141739
ID_44206	ANAPC11	AD	7.3	7.2	9	0	1	0.0361	0.0066	ID_44206	ANAPC11	0.00187436	4.40033e+18	7.79885e+06	2.48e+30
ID_11044	ABI1	AA	11.1	9	11.2	0	0.8931	0.7835	0.0903	ID_11044	ABI1	0.00187479	0.0641925	0.0113709	0.362388
ID_53585	RTN4	AP	4	NA	NA	0	0.9739	0.0053	0.0005	ID_53585	RTN4	0.00187487	2.39e+177	3.71e+65	1.54e+289
ID_53116	LCLAT1	AT	9	NA	NA	0	1	0.6084	0.079	ID_53116	LCLAT1	0.0018753	46.8212	4.14449	528.949
ID_53115	LCLAT1	AT	8	NA	NA	0	1	0.6084	0.079	ID_53115	LCLAT1	0.00187624	0.0213623	0.00189097	0.241331
ID_13772	RPLP2	RI	1.2	1.1	1.3	0	1	0.0034	0.0005	ID_13772	RPLP2	0.00188122	3.7e+188	4.65e+69	2.94e+307
ID_68239	TM4SF19	AT	6	NA	NA	0	1	0.8675	0.1281	ID_68239	TM4SF19	0.00188174	0.138738	0.0399298	0.482051
ID_22516	NAB2	ES	6	5	7	0	0.9881	0.3562	0.0662	ID_22516	NAB2	0.00189426	0.0178978	0.00141381	0.226574
ID_78166	ESR1	AT	14	NA	NA	0	0.9857	0.602	0.112	ID_78166	ESR1	0.0019	9.65665	2.30814	40.4008
ID_78167	ESR1	AT	13	NA	NA	0	0.9857	0.602	0.112	ID_78167	ESR1	0.00190007	0.103557	0.0247523	0.433253
ID_43805	AFMID	ES	8:9:10:11.1	6	12	1	0.9834	0.6384	0.1092	ID_43805	AFMID	0.00191497	0.0520718	0.00805366	0.336676
ID_64848	CCDC36	AT	12	NA	NA	0	1	0.5362	0.0891	ID_64848	CCDC36	0.00191543	16.7998	2.82728	99.8247
ID_64847	CCDC36	AT	10.2	NA	NA	0	1	0.5362	0.0891	ID_64847	CCDC36	0.00191543	0.0595246	0.0100176	0.353697
ID_71658	SUB1	ES	4.1:4.2	3	5	0	1	0.0297	0.0042	ID_71658	SUB1	0.00192284	1.08e+28	20900510106	5.58e+45
ID_83171	CLU	RI	3.2	3.1	3.3	0	0.9311	1	0.1317	ID_83171	CLU	0.00192613	6.0403	1.93847	18.8217
ID_28110	RAD51B	AT	12	NA	NA	0	0.9739	0.9378	0.2176	ID_28110	RAD51B	0.00192756	3.96516	1.66018	9.47034
ID_75775	HMGA1	ES	1.3	1.1	3.1	0	0.8219	1	0.168	ID_75775	HMGA1	0.00193651	0.239907	0.0972865	0.591608
ID_60769	CBS	AP	NA	NA	NA	0	0.9454	0.4255	0.049	ID_60769	CBS	0.00193955	75.2522	4.89601	1156.63
ID_73448	H2AFY	AA	6.1:6.2	5	6.3	0	0.9976	0.0571	0.0075	ID_73448	H2AFY	0.00194902	4.26e-23	2.99e-37	6.06e-09
ID_32920	C16orf13	ES	03:04:00	1	5	0	0.8765	0.8177	0.1815	ID_32920	C16orf13	0.00194974	0.191225	0.0671399	0.544642
ID_63193	ARPC4-TTLL3	AT	8.2	NA	NA	0	0.7625	0.4334	0.0616	ID_63193	ARPC4-TTLL3	0.00196377	27.784	3.38595	227.987
ID_63192	ARPC4-TTLL3	AT	14	NA	NA	0	0.7625	0.4334	0.0616	ID_63192	ARPC4-TTLL3	0.00196377	0.0359919	0.00438622	0.295338
ID_152202	GLTPD2	ES	3	2	4	1	0.9145	0.6219	0.0818	ID_152202	GLTPD2	0.00196624	0.0415499	0.00554417	0.31139
ID_22170	COPZ1	ES	04:05:00	3.2	6	0	1	0.0164	0.002	ID_22170	COPZ1	0.00196796	1.42e-44	2.44e-72	8.32e-17
ID_16850	FRMD8	ES	4	3	5	0	0.9002	0.2783	0.0514	ID_16850	FRMD8	0.00197295	0.00473819	0.000159701	0.140578
ID_3132	CYB5RL	ES	8	7	9	0	0.9929	0.5719	0.1196	ID_3132	CYB5RL	0.0019846	0.102856	0.0243336	0.434763
ID_82330	SLC4A2	AD	5.2	5.1	6	0	0.8717	1	0.0705	ID_82330	SLC4A2	0.00198631	10.5789	2.37204	47.1799
ID_78150	MTHFD1L	AT	29	NA	NA	0	0.9952	0.6044	0.1195	ID_78150	MTHFD1L	0.00198739	0.0978368	0.0224193	0.426955
ID_78151	MTHFD1L	AT	8	NA	NA	0	0.9952	0.6044	0.1195	ID_78151	MTHFD1L	0.00198739	10.2211	2.34217	44.6044
ID_54220	ELMOD3	RI	2.5:2.6:2.7:2.8	2.4	2.9	0	0.9596	0.7223	0.1584	ID_54220	ELMOD3	0.00198965	0.159668	0.0499018	0.510883
ID_90628	FAM3A	ES	7.1:7.2	6	8	0	0.981	0.4582	0.0968	ID_90628	FAM3A	0.00199175	0.0560815	0.00902776	0.348385
ID_44092	BAIAP2	AT	16.3	NA	NA	0	1	0.3567	0.0514	ID_44092	BAIAP2	0.00199285	121.633	5.79526	2552.87
ID_14466	RRAS2	AA	7.1	2	7.2	0	0.8765	0.0804	0.0092	ID_14466	RRAS2	0.00199684	4068580000000	41037.9	4.03e+20
ID_26399	GAS6	AA	10.2	9	10.3	0	0.943	0.1109	0.0153	ID_26399	GAS6	0.00199858	4.16036e+06	263.795	65613722547
ID_89837	TSC22D3	AP	5	NA	NA	0	0.9667	0.248	0.0455	ID_89837	TSC22D3	0.00199996	307.146	8.12385	11612.5
ID_12935	LDB1	AP	NA	NA	NA	0	0.9026	0.8395	0.1695	ID_12935	LDB1	0.00200611	0.177155	0.0590864	0.531155
ID_12934	LDB1	AP	2	NA	NA	0	0.9026	0.8395	0.1695	ID_12934	LDB1	0.00200623	5.64472	1.88267	16.9243
ID_22409	NABP2	RI	1.2:1.3	1.1	1.4	0	0.9715	0.9609	0.1298	ID_22409	NABP2	0.00200813	9.06187	2.23805	36.6915
ID_83132	DPYSL2	AP	NA	NA	NA	0	0.7815	0.4754	0.0588	ID_83132	DPYSL2	0.00203786	60.4104	4.46077	818.114
ID_56500	GULP1	AT	15	NA	NA	0	0.9857	0.976	0.2865	ID_56500	GULP1	0.00204189	2.61955	1.42049	4.83075
ID_56499	GULP1	AT	9.2	NA	NA	0	0.9857	0.976	0.2865	ID_56499	GULP1	0.00204193	0.381746	0.207007	0.703983
ID_49414	ZNF567	AP	4	NA	NA	0	0.7577	0.9881	0.3443	ID_49414	ZNF567	0.00204552	2.85288	1.4652	5.55482
ID_79743	EGFR	AT	33	NA	NA	0	1	0.199	0.0183	ID_79743	EGFR	0.00205367	1.84791e+07	442.644	771450000000
ID_61232	YDJC	ES	4	3	5	0	0.9834	0.7312	0.1269	ID_61232	YDJC	0.00206799	0.14902	0.0443797	0.500382
ID_20646	PLEKHA5	AT	36	NA	NA	0	1	0.6077	0.1194	ID_20646	PLEKHA5	0.00207058	11.4287	2.42504	53.8605
ID_19548	THYN1	RI	1.2:1.3	1.1	1.4	0	0.9929	0.8114	0.123	ID_19548	THYN1	0.00207397	9.93077	2.30374	42.8087
ID_13782	CD151	ES	2	1.2	3	0	1	0.5196	0.0786	ID_13782	CD151	0.0020751	0.0306203	0.00332927	0.281624
ID_9718	NEK2	AT	7.2	NA	NA	0	1	0.9524	0.2025	ID_9718	NEK2	0.00207724	0.133305	0.0369617	0.480773
ID_9717	NEK2	AT	8	NA	NA	0	1	0.9524	0.2025	ID_9717	NEK2	0.00207757	7.5013	2.07991	27.0538
ID_1996	SMAP2	AP	3	NA	NA	0	0.9691	0.0973	0.0066	ID_1996	SMAP2	0.00208351	335629000000	15372.4	7.3279e+18
ID_72883	ST8SIA4	AT	6	NA	NA	0	1	0.2279	0.0336	ID_72883	ST8SIA4	0.00209527	0.000855652	9.5e-06	0.0770423
ID_72882	ST8SIA4	AT	4.2	NA	NA	0	1	0.2279	0.0336	ID_72882	ST8SIA4	0.00209664	1168.27	12.9745	105196
ID_25906	EBPL	ES	4.1:4.2	2	6	0	1	0.1011	0.0142	ID_25906	EBPL	0.00210344	2.9e-08	4.56e-13	0.00184753
ID_85504	PUF60	ES	3	1	4	0	0.9905	0.2507	0.0414	ID_85504	PUF60	0.00210502	0.00322246	8.32e-05	0.124863
ID_16591	NUDT22	AD	1.2	1.1	1.4	0	0.9929	0.524	0.0849	ID_16591	NUDT22	0.00210919	30.6697	3.45875	271.956
ID_86282	TLN1	ES	38.2:39.1	38.1	39.2	0	0.9549	0.0053	0.0003	ID_86282	TLN1	0.00212252	5.29e-262	0	2.46e-95
ID_14081	FAM160A2	AD	8.2	8.1	9.1	0	0.9169	0.6546	0.1132	ID_14081	FAM160A2	0.0021324	12.6168	2.50229	63.615
ID_31624	STOML1	ES	5	4	6	0	0.9881	0.6187	0.0852	ID_31624	STOML1	0.00214257	0.0896797	0.0192313	0.418196
ID_61965	TOM1	ES	4	3	5	0	0.9715	0.0703	0.0119	ID_61965	TOM1	0.00215365	1.62927e+08	925.011	28697100000000
ID_27583	CNIH1	ES	4	3	5	0	0.9834	0.0274	0.0023	ID_27583	CNIH1	0.00215629	6.97e+37	46330500000000	1.05e+62
ID_50069	ATP5SL	AT	7	NA	NA	0	1	0.1474	0.0221	ID_50069	ATP5SL	0.00216111	1.02e-05	6.57e-09	0.0157705
ID_50070	ATP5SL	AT	6.3	NA	NA	0	1	0.1474	0.0221	ID_50070	ATP5SL	0.00216269	98192.4	63.361	1.52172e+08
ID_7800	C1orf43	ES	4	3	5	0	1	0.3498	0.0465	ID_7800	C1orf43	0.00217732	0.00407949	0.000120956	0.137589
ID_32963	FAM173A	RI	4.2	4.1	4.3	0	1	0.3654	0.0642	ID_32963	FAM173A	0.00217971	54.4556	4.22428	701.993
ID_38691	RPAIN	ES	00:05:06.100000	3	7	0	0.9857	0.9356	0.1696	ID_38691	RPAIN	0.00221969	5.14708	1.80165	14.7045
ID_62402	XPNPEP3	AT	14.2	NA	NA	0	1	0.1884	0.0308	ID_62402	XPNPEP3	0.00222886	9.8e-05	2.64e-07	0.0363579
ID_22526	STAT6	ES	4	2.1	5	0	0.9501	0.1	0.0093	ID_22526	STAT6	0.00223122	2.85e-10	2.16e-16	0.000374301
ID_1635	S100PBP	AT	9	NA	NA	0	1	0.6105	0.0948	ID_1635	S100PBP	0.00223559	23.1442	3.08778	173.475
ID_1636	S100PBP	AT	7	NA	NA	0	1	0.6105	0.0948	ID_1636	S100PBP	0.00223641	0.0432139	0.00576553	0.323898
ID_78637	GNA12	AP	NA	NA	NA	0	0.867	0.2277	0.0317	ID_78637	GNA12	0.00224113	0.000228055	1.05e-06	0.0493863
ID_3557	IFI44	ES	2	1	3	0	0.9644	0.5578	0.0849	ID_3557	IFI44	0.00224163	0.0547011	0.00848522	0.352638
ID_59223	ROMO1	RI	1.3:1.4	1.2	1.5	0	1	0.1716	0.0185	ID_59223	ROMO1	0.00224265	56604.8	50.6611	6.32457e+07
ID_10167	MRPL55	ES	2.2	1.1	2.9	0	1	0.8095	0.1649	ID_10167	MRPL55	0.00224726	0.186067	0.0632683	0.547207
ID_42645	MKS1	ES	17.3:18:19.1	17.2	19.2	0	0.9952	0.0093	0.0005	ID_42645	MKS1	0.00225224	2.18e-148	3.97e-243	1.2e-53
ID_56560	HIBCH	ES	14	13	15	0	1	0.2937	0.0387	ID_56560	HIBCH	0.00225398	0.000811907	8.44e-06	0.0780788
ID_57353	ATIC	ES	3	2	4	0	0.9762	0.0538	0.0039	ID_57353	ATIC	0.00226087	3.79e-22	6.77e-36	2.13e-08
ID_8193	SLC25A44	RI	2.2	2.1	2.3	0	0.9145	0.062	0.0104	ID_8193	SLC25A44	0.00227121	3.72e-11	7.49e-18	0.000185287
ID_58948	KIF3B	RI	2.2	2.1	2.3	0	0.8836	0.2872	0.0314	ID_58948	KIF3B	0.00227478	0.00121002	1.62e-05	0.0904318
ID_79319	PSMA2	ES	3	2	4	0	1	0.0199	0.0024	ID_79319	PSMA2	0.00227496	2.57e-40	9.63e-66	6.86e-15
ID_17026	SLC29A2	ES	9	8	10.1	0	0.9905	0.2189	0.0365	ID_17026	SLC29A2	0.00228768	0.000550074	4.42e-06	0.0683906
ID_26852	PSME1	RI	10.2:10.3	10.1	10.4	0	1	0.0565	0.0087	ID_26852	PSME1	0.00228967	354811000000	13410.3	9.38764e+18
ID_19084	HYOU1	ES	18.1:18.2	17	19	0	0.7933	0.9389	0.1802	ID_19084	HYOU1	0.002294	5.63152	1.85417	17.1042
ID_8606	APOA2	AA	3.2	2	3.3	0	0.9976	0.1984	0.011	ID_8606	APOA2	0.00229548	2.3e-06	5.45e-10	0.00967958
ID_21510	PRKAG1	AD	1.2	1.1	2	0	0.943	0.6471	0.0798	ID_21510	PRKAG1	0.00229635	10.2682	2.29761	45.8898
ID_58563	VPS16	ES	10:11:12.2:12.4	9	13	0	0.9929	0.055	0.011	ID_58563	VPS16	0.00231021	1.22e-09	2.26e-15	0.000660463
ID_26641	MRPL52	ES	3	2	4.1	0	1	0.1098	0.0152	ID_26641	MRPL52	0.00231607	2.50514e+06	191.425	32784203575
ID_40233	RFFL	ES	11	10	12	0	0.9857	0.3075	0.0472	ID_40233	RFFL	0.00231609	0.00823448	0.000375502	0.180576
ID_52760	SDC1	AP	NA	NA	NA	0	0.943	0.9611	0.1152	ID_52760	SDC1	0.00231864	9.99515	2.27238	43.964
ID_52759	SDC1	AP	2.1	NA	NA	0	0.943	0.9611	0.1152	ID_52759	SDC1	0.00231864	0.100048	0.0227459	0.440066
ID_32927	FAM195A	ES	3	2	4	0	1	0.8165	0.1375	ID_32927	FAM195A	0.00231979	0.141405	0.0401615	0.497873
ID_18870	APOA1	RI	1.3:1.4	1.2	1.5	0	0.9644	0.708	0.158	ID_18870	APOA1	0.0023255	6.9347	1.99396	24.1179
ID_43928	LGALS3BP	AT	6	NA	NA	0	1	0.0423	0.0053	ID_43928	LGALS3BP	0.00233807	8.6e-21	1.03e-33	7.18e-08
ID_7854	SHC1	AP	NA	NA	NA	0	0.9739	0.9028	0.2046	ID_7854	SHC1	0.00233818	0.267407	0.114363	0.625259
ID_7855	SHC1	AP	2.1	NA	NA	0	0.9739	0.9028	0.2046	ID_7855	SHC1	0.0023384	3.73957	1.59932	8.74398
ID_84673	COX6C	AP	NA	NA	NA	0	1	0.3063	0.0392	ID_84673	COX6C	0.00234209	0.00213166	4.06e-05	0.112007
ID_76317	MRPS18A	ES	5	4	6	0	1	0.0759	0.0115	ID_76317	MRPS18A	0.00234351	1.4e-09	2.78e-15	0.000706622
ID_13601	SIRT3	AA	5.1:5.2	4	5.3	0	0.9715	0.4029	0.0422	ID_13601	SIRT3	0.00234393	108.419	5.2994	2218.11
ID_41691	NBR1	AP	NA	NA	NA	0	0.867	0.8689	0.1036	ID_41691	NBR1	0.0023486	8.47321	2.13867	33.57
ID_41692	NBR1	AP	2	NA	NA	0	0.867	0.8689	0.1036	ID_41692	NBR1	0.00234877	0.118021	0.0297888	0.467587
ID_24283	ACACB	ES	48	47	49	0	0.9097	0.7073	0.1074	ID_24283	ACACB	0.00236813	0.0516015	0.00763136	0.348918
ID_86654	GNAQ	AP	NA	NA	NA	0	0.8195	0.3051	0.0204	ID_86654	GNAQ	0.00237354	2.33e-05	2.39e-08	0.0226408
ID_86653	GNAQ	AP	3	NA	NA	0	0.8195	0.3051	0.0204	ID_86653	GNAQ	0.00237354	42978.3	44.1681	4.18205e+07
ID_16952	DRAP1	AA	5.1	4	5.2	0	1	0.0232	0.0046	ID_16952	DRAP1	0.0023781	2.02e-31	3.21e-51	1.27e-11
ID_9240	UCHL5	AT	15	NA	NA	0	1	0.3957	0.0682	ID_9240	UCHL5	0.00238723	0.024595	0.00225142	0.268681
ID_14856	EIF3M	ES	2.1:2.2:3	1	5	0	0.9572	1	0.1948	ID_14856	EIF3M	0.00240093	0.254316	0.105061	0.61561
ID_95457	GCKR	ES	6	5	7	0	0.9739	0.3348	0.0546	ID_95457	GCKR	0.00242182	0.00929539	0.000452179	0.191084
ID_27751	JKAMP	AA	2.1	1.1	2.2	0	0.8694	0.4195	0.0876	ID_27751	JKAMP	0.00242438	0.0303722	0.00317477	0.290564
ID_68466	MAEA	AP	4	NA	NA	0	0.9501	0.042	0.0042	ID_68466	MAEA	0.00242483	1.3e+20	1.30157e+07	1.3e+33
ID_212778	UPB1	ES	10	9	11	1	0.886	0.626	0.0786	ID_212778	UPB1	0.00243079	0.0368119	0.00435464	0.311189
ID_88110	C9orf116	AP	2.1	NA	NA	0	0.7553	0.5641	0.1359	ID_88110	C9orf116	0.00243661	0.137243	0.0379995	0.495683
ID_88112	C9orf116	AP	NA	NA	NA	0	0.7553	0.5641	0.1359	ID_88112	C9orf116	0.00243661	7.28634	2.01742	26.3162
ID_9239	UCHL5	AT	14	NA	NA	0	1	0.4099	0.0666	ID_9239	UCHL5	0.00243821	40.7315	3.70556	447.721
ID_76000	MTCH1	AD	8.2	8.1	9	0	1	0.7983	0.0984	ID_76000	MTCH1	0.00243981	18.0129	2.77713	116.835
ID_84243	PEX2	ES	3	2.2	4.2	0	0.9644	0.45	0.0532	ID_84243	PEX2	0.00245789	0.0043984	0.000131247	0.147402
ID_46359	WDR18	ES	9	8	10	0	1	0.1427	0.0176	ID_46359	WDR18	0.00245898	5.59e-06	2.23e-09	0.0140268
ID_53737	MDH1	ES	04:05:06	1	7	0	1	0.017	0.0024	ID_53737	MDH1	0.00246469	2.59e-47	1.8e-77	3.73e-17
ID_60269	ATP5J	AD	1.3:1.4:1.5	1.2	3	0	1	0.2679	0.0409	ID_60269	ATP5J	0.00247711	0.00175832	2.89e-05	0.107003
ID_67000	CEP70	AT	7.2	NA	NA	0	1	0.4139	0.0739	ID_67000	CEP70	0.00248111	30.1958	3.32092	274.559
ID_61869	SFI1	ES	11:12:13:14:15	10	16	0	0.8979	0.0303	0.0016	ID_61869	SFI1	0.00248184	9.93e-46	6.98e-75	1.41e-16
ID_46458	MUM1	ES	5.1	4	6	0	0.8195	0.7728	0.1339	ID_46458	MUM1	0.00248306	7.4284	2.02627	27.2328
ID_47043	SLC25A23	ES	9	8	10	0	0.9857	0.2443	0.0456	ID_47043	SLC25A23	0.0024872	0.00547127	0.000187282	0.159839
ID_3033	ECHDC2	ES	5.1:6.1	2.1	6.2	0	0.9929	0.7574	0.1272	ID_3033	ECHDC2	0.00248914	5.44914	1.81631	16.348
ID_58751	SNX5	RI	1.2	1.1	1.3	0	0.943	0.8735	0.1948	ID_58751	SNX5	0.00249641	0.183226	0.0609912	0.550436
ID_22477	PTGES3	ES	6	5	7	0	1	0.0508	0.0061	ID_22477	PTGES3	0.00250587	3.14e-19	3.16e-31	3.13e-07
ID_78884	SNX13	ES	3	2	4	0	0.7743	0.0228	0.0013	ID_78884	SNX13	0.00251259	6.79e-61	6.4e-100	7.2e-22
ID_10140	MRPL55	ES	2.2:2.4:2.5:2.6:2.8	1.1	2.9	0	0.7886	0.0315	0.0034	ID_10140	MRPL55	0.00252945	2.08e-64	9.67e-106	4.47e-23
ID_33218	MLST8	RI	11.2	11.1	11.3	0	1	0.1588	0.0207	ID_33218	MLST8	0.00254432	112034	58.9114	2.13061e+08
ID_55682	PKP4	AA	12.1	11	12.2	0	0.8361	0.3333	0.0482	ID_55682	PKP4	0.00256321	3786.41	17.8947	801181
ID_60876	COL18A1	AD	3.2	3.1	4	0	0.9572	0.8765	0.1435	ID_60876	COL18A1	0.00257409	4.47646	1.68931	11.8621
ID_76112	FOXP4	AA	11.1	10	11.2	0	0.9264	0.6202	0.0822	ID_76112	FOXP4	0.00258323	28.8618	3.23975	257.119
ID_58034	NGEF	AT	17	NA	NA	0	0.9929	0.067	0.0089	ID_58034	NGEF	0.00259263	6.52e-13	7.69e-21	5.53e-05
ID_58033	NGEF	AT	8.2	NA	NA	0	0.9929	0.067	0.0089	ID_58033	NGEF	0.00259263	1532890000000	18071.9	1.3e+20
ID_26795	DHRS4L2	AP	2	NA	NA	0	0.9976	0.6247	0.1003	ID_26795	DHRS4L2	0.00261206	0.102445	0.0232372	0.451648
ID_26796	DHRS4L2	AP	NA	NA	NA	0	0.9976	0.6247	0.1003	ID_26796	DHRS4L2	0.00261206	9.76131	2.21411	43.0345
ID_34184	NDE1	AT	12	NA	NA	0	1	0.6701	0.1481	ID_34184	NDE1	0.00261914	6.96009	1.967	24.6278
ID_34185	NDE1	AT	13	NA	NA	0	1	0.6701	0.1481	ID_34185	NDE1	0.00261933	0.143678	0.040605	0.508395
ID_26638	MRPL52	ES	00:03:04.100000	2	5	0	0.9952	1	0.1624	ID_26638	MRPL52	0.00262666	5.39513	1.79928	16.1773
ID_38853	ACADVL	RI	3.2	3.1	3.3	0	0.9359	0.383	0.0679	ID_38853	ACADVL	0.0026267	49.5801	3.89764	630.687
ID_3023	ECHDC2	ES	13	12	14	1	0.9929	0.4271	0.0523	ID_3023	ECHDC2	0.00263122	0.00988015	0.000487651	0.200179
ID_46441	CIRBP	RI	7.4	7.3	7.5	0	0.9952	0.3463	0.0557	ID_46441	CIRBP	0.00263748	95.4603	4.89124	1863.06
ID_17244	CDK2AP2	AD	1.2	1.1	2	0	0.9976	0.4484	0.077	ID_17244	CDK2AP2	0.00264903	0.0212185	0.00172037	0.261702
ID_22365	RPL41	RI	1.2	1.1	1.3	0	1	0.0773	0.0122	ID_22365	RPL41	0.00265156	921031837	1313.45	645855000000000
ID_28355	ENTPD5	AA	6.1	5	6.2	0	0.9074	0.368	0.0422	ID_28355	ENTPD5	0.00267761	236.94	6.67629	8408.96
ID_21577	SPATS2	AT	6	NA	NA	0	1	0.418	0.0623	ID_21577	SPATS2	0.00268278	0.00513016	0.000164085	0.160395
ID_21578	SPATS2	AT	19	NA	NA	0	1	0.418	0.0623	ID_21578	SPATS2	0.0026833	194.907	6.23397	6093.86
ID_13081	MXI1	AP	4	NA	NA	0	0.9097	0.5578	0.0695	ID_13081	MXI1	0.00269465	26.3082	3.1081	222.682
ID_88558	PIR	AD	1.2	1.1	2	0	0.9002	1	0.0929	ID_88558	PIR	0.00269496	11.465	2.33017	56.4103
ID_53763	VPS54	ES	10	9	11	0	0.8694	0.1684	0.0298	ID_53763	VPS54	0.00270031	0.000167828	5.73e-07	0.0491234
ID_4333	CSDE1	ES	6	5	7	0	0.9287	0.4667	0.0587	ID_4333	CSDE1	0.00271075	78.5802	4.53477	1361.67
ID_50037	HNRNPUL1	ES	08:09:00	7	10	0	0.9857	0.0176	0.0016	ID_50037	HNRNPUL1	0.00271492	1.07e-50	2.31e-83	4.95e-18
ID_1518	PTP4A2	ES	7	6	8	0	1	0.0534	0.0083	ID_1518	PTP4A2	0.00271985	1.85e-13	8.74e-22	3.91e-05
ID_87514	DENND1A	AT	25	NA	NA	0	1	0.4063	0.0523	ID_87514	DENND1A	0.00272095	0.022744	0.00191655	0.269906
ID_75393	SIRT5	AT	12	NA	NA	0	1	0.4949	0.0937	ID_75393	SIRT5	0.00272311	15.3744	2.5749	91.799
ID_75391	SIRT5	AT	13	NA	NA	0	1	0.4949	0.0937	ID_75391	SIRT5	0.00272315	0.0650432	0.0108934	0.388366
ID_84675	COX6C	AP	2.1	NA	NA	0	1	0.3062	0.038	ID_84675	COX6C	0.00272705	477.126	8.44963	26941.9
ID_26837	DCAF11	ES	3.1:3.2	2.5	4	0	0.9667	0.0855	0.0123	ID_26837	DCAF11	0.00273011	1.61e-09	2.85e-15	0.000907613
ID_46498	APC2	ES	5.2:6:7:8:9:10:11.1	5.1	11.2	0	0.9976	0.4629	0.024	ID_46498	APC2	0.00273633	1.88e-39	8.69e-65	4.07e-14
ID_83971	ASPH	RI	20.2	20.1	20.3	0	0.9976	0.0008	0	ID_83971	ASPH	0.00273633	0	0	0
ID_23781	VEZT	ES	5:6.1:6.2:9	4	11	0	0.8361	0.2834	0.0456	ID_23781	VEZT	0.00274508	0.00487216	0.000149453	0.158833
ID_26553	HNRNPC	ES	2.2:2.3:2.4:2.6	1	3.2	0	0.9739	0.0106	0.0008	ID_26553	HNRNPC	0.00275905	6.78e+142	2.04e+49	2.25e+236
ID_68698	EVC	AT	12	NA	NA	0	0.905	0.3739	0.043	ID_68698	EVC	0.00276096	76.6914	4.47292	1314.93
ID_49830	RPS16	AD	2.2	2.1	3.1	0	1	0.0208	0.0034	ID_49830	RPS16	0.00278427	1.29e-33	3.59e-55	4.63e-12
ID_48519	COPE	ES	04:05:00	3	6	0	0.924	1	0.2552	ID_48519	COPE	0.00280029	0.311185	0.144731	0.669077
ID_80622	BUD31	ES	4	3.2	6	0	1	0.1918	0.0333	ID_80622	BUD31	0.00280058	8.07e-05	1.67e-07	0.0389961
ID_43930	LGALS3BP	AT	5.5	NA	NA	0	1	0.0416	0.0051	ID_43930	LGALS3BP	0.00280172	1.96e+20	9.65295e+06	3.98e+33
ID_87439	STOM	ES	4:5:6:7	3	8	0	0.9976	0.005	0.0006	ID_87439	STOM	0.002802	1.18e-162	7.54e-269	1.84e-56
ID_74370	CYFIP2	ES	6.2:8.1:10.1:10.2:10.3	6.1	11	0	0.8124	0.153	0.014	ID_74370	CYFIP2	0.00281131	1.51e-06	2.28e-10	0.00993593
ID_26345	F7	ES	3.1:3.2:4.1:4.2	1	4.4	0	0.9311	0.2934	0.0319	ID_26345	F7	0.00281282	0.000102017	2.46e-07	0.0423852
ID_27538	C14orf166	ES	3	2	4	0	1	0.085	0.0051	ID_27538	C14orf166	0.00281615	7.63e-12	3.87e-19	0.000150352
ID_42503	NME1	ES	3	1	4	0	1	0.1663	0.0217	ID_42503	NME1	0.00281618	82350.3	49.0129	1.38363e+08
ID_78335	SLC22A1	ES	10	9	11	0	0.9549	0.3481	0.0557	ID_78335	SLC22A1	0.00281763	340.07	7.42032	15585.2
ID_41941	ACBD4	AT	12	NA	NA	0	1	0.5369	0.0827	ID_41941	ACBD4	0.00282415	0.0409683	0.00503222	0.333532
ID_18083	CCDC90B	AD	1.3:1.4:1.5	1.2	2	0	0.9596	0.4936	0.078	ID_18083	CCDC90B	0.00282469	25.8181	3.05647	218.085
ID_29716	UBE3A	AP	NA	NA	NA	0	0.7791	0.1899	0.0128	ID_29716	UBE3A	0.00283691	7.06e-07	6.46e-11	0.00772525
ID_29718	UBE3A	AP	6.1	NA	NA	0	0.7791	0.1899	0.0128	ID_29718	UBE3A	0.00283691	1.41603e+06	129.446	15490272652
ID_77915	MAP7	ES	9	8	10	0	0.8219	0.9532	0.1503	ID_77915	MAP7	0.00283785	7.78679	2.02323	29.969
ID_54198	RETSAT	ES	9	8	10	0	0.9976	0.158	0.0113	ID_54198	RETSAT	0.00283914	2.58e-13	1.4e-21	4.77e-05
ID_41942	ACBD4	AT	11	NA	NA	0	1	0.5369	0.0827	ID_41942	ACBD4	0.0028457	24.3507	2.99086	198.256
ID_86353	MELK	ES	8	7	9	0	0.8741	1	0.3308	ID_86353	MELK	0.00284617	0.441586	0.258132	0.755417
ID_68240	TM4SF19	AT	5.2	NA	NA	0	1	0.6476	0.1429	ID_68240	TM4SF19	0.00285211	4.75863	1.70759	13.2611
ID_90619	SLC10A3	RI	1.2	1.1	1.3	0	0.7815	0.6877	0.1683	ID_90619	SLC10A3	0.00286786	7.32413	1.97833	27.1153
ID_76485	GSTA4	ES	4	3.2	5.1	0	0.9715	0.1852	0.0274	ID_76485	GSTA4	0.00287323	0.00031289	1.55e-06	0.0630423
ID_63304	FANCD2	AT	10.2	NA	NA	0	1	0.516	0.0795	ID_63304	FANCD2	0.00287651	0.00934766	0.000432819	0.201883
ID_50443	ERCC1	ES	9	8	10.1	0	1	0.3181	0.0566	ID_50443	ERCC1	0.00290559	0.0162868	0.00108339	0.244844
ID_24278	UNG	AP	2.1	NA	NA	0	0.9549	0.7094	0.1628	ID_24278	UNG	0.00291099	0.2004	0.0695483	0.577443
ID_24277	UNG	AP	NA	NA	NA	0	0.9549	0.7094	0.1628	ID_24277	UNG	0.00291122	4.98996	1.73175	14.3783
ID_27010	SDR39U1	ES	5	4.1	7	0	1	0.2492	0.0385	ID_27010	SDR39U1	0.00292385	0.0019951	3.32e-05	0.119784
ID_87515	DENND1A	AT	22	NA	NA	0	1	0.4021	0.0519	ID_87515	DENND1A	0.00292519	43.3714	3.62054	519.558
ID_65984	NFKBIZ	RI	7.2	7.1	7.3	0	0.9002	0.1972	0.0156	ID_65984	NFKBIZ	0.00292789	6.05e-10	5.12e-16	0.000715251
ID_16233	SDHAF2	ES	00:03:04.100000	1	6	0	0.9881	0.7563	0.1373	ID_16233	SDHAF2	0.00293748	7.03469	1.94501	25.443
ID_7501	ENSA	ES	4	3.1	5.1	0	1	0.1129	0.0137	ID_7501	ENSA	0.00293816	8.04877e+07	496.397	13050600000000
ID_149	AURKAIP1	AD	1.3	1.2	1.5	0	0.9952	0.3205	0.0478	ID_149	AURKAIP1	0.0029583	588.148	8.772	39434.3
ID_22879	HMGA2	AT	5	NA	NA	0	0.8385	0.7065	0.0381	ID_22879	HMGA2	0.0029607	94.5692	4.70649	1900.21
ID_84054	COPS5	AP	2.1	NA	NA	0	0.9762	0.1355	0.0186	ID_84054	COPS5	0.00296792	6.11e-06	2.22e-09	0.0168151
ID_84053	COPS5	AP	NA	NA	NA	0	0.9762	0.1355	0.0186	ID_84053	COPS5	0.00296792	163595	59.4705	4.50025e+08
ID_16163	CYB561A3	RI	6.5:6.6	6.4	6.7	0	0.9834	1	0.2256	ID_16163	CYB561A3	0.00297356	2.95519	1.44572	6.0407
ID_61590	GAS2L1	AA	4.3	4.1	4.4	0	0.9786	0.1706	0.0307	ID_61590	GAS2L1	0.00299249	0.000190229	6.65e-07	0.0544367
ID_48694	ZNF93	AT	5	NA	NA	0	0.9905	0.4131	0.0481	ID_48694	ZNF93	0.00299959	59.1218	3.99632	874.652
ID_38878	CTDNEP1	AP	3	NA	NA	0	0.962	0.6238	0.102	ID_38878	CTDNEP1	0.00300225	0.0713951	0.0124895	0.408123
ID_46862	RPL36	RI	4.2:4.3:4.4	4.1	4.5	0	1	0.0588	0.0087	ID_46862	RPL36	0.00302406	888617000000	11245.2	7.02e+19
ID_65145	ABHD14B	ES	3.3	2.2	6.1	1	0.8599	0.29	0.0411	ID_65145	ABHD14B	0.00302428	0.00204946	3.43e-05	0.122625
ID_26472	RNASE1	ES	2.3	1	3.1	0	0.9952	0.2167	0.0301	ID_26472	RNASE1	0.00303442	5176.97	18.1263	1.47857e+06
ID_48498	KLHL26	RI	5.2	5.1	5.3	0	0.9715	0.0801	0.0044	ID_48498	KLHL26	0.00304486	6.89e-36	3.81e-59	1.25e-12
ID_2183	HYI	AD	8.2	8.1	9	0	0.9976	0.8212	0.0794	ID_2183	HYI	0.00305749	0.0141776	0.000848144	0.236993
ID_26132	UGGT2	ES	9	7	10	0	0.9881	0.2116	0.0371	ID_26132	UGGT2	0.00305925	0.00373307	9.23e-05	0.150935
ID_76070	MOCS1	ES	11.1:11.2	10	12.1	0	0.9501	0.3639	0.0666	ID_76070	MOCS1	0.00305995	0.018182	0.00128206	0.257856
ID_58463	CSNK2A1	ES	2	1	3	0	0.8361	0.429	0.08	ID_58463	CSNK2A1	0.00306796	29.6776	3.14585	279.975
ID_29240	EVL	AP	2	NA	NA	0	0.8789	0.527	0.088	ID_29240	EVL	0.00308911	17.6947	2.63772	118.702
ID_52482	CHMP2A	AP	3.1	NA	NA	0	1	0.1287	0.0136	ID_52482	CHMP2A	0.00309486	1.53456e+07	265.961	885419000000
ID_81305	ATXN7L1	AP	NA	NA	NA	0	0.9881	0.2486	0.0415	ID_81305	ATXN7L1	0.00310515	0.00215469	3.68e-05	0.126124
ID_43705	SEC14L1	AP	7	NA	NA	0	1	0.8713	0.1635	ID_43705	SEC14L1	0.00311814	0.149266	0.042289	0.526855
ID_45651	NEDD4L	AP	NA	NA	NA	0	0.9952	0.916	0.2346	ID_45651	NEDD4L	0.00311887	0.338376	0.164947	0.69415
ID_25005	OGFOD2	AP	NA	NA	NA	0	1	0.9821	0.1103	ID_25005	OGFOD2	0.00312579	8.13039	2.02525	32.6394
ID_25006	OGFOD2	AP	2	NA	NA	0	1	0.9821	0.1103	ID_25006	OGFOD2	0.00312579	0.122995	0.0306378	0.493765
ID_85500	SCRIB	ES	36	35	37	0	1	0.7203	0.1562	ID_85500	SCRIB	0.00312645	0.129309	0.0332967	0.502174
ID_25427	CRYL1	ES	2	1	3	0	0.981	0.0494	0.0035	ID_25427	CRYL1	0.00312705	2.77942e+19	3.52533e+06	2.19e+32
ID_62651	KIAA0930	AT	6	NA	NA	0	1	0.0525	0.0072	ID_62651	KIAA0930	0.0031475	71921400000000	45671.2	1.13e+23
ID_62650	KIAA0930	AT	14	NA	NA	0	1	0.0525	0.0072	ID_62650	KIAA0930	0.0031475	1.39e-14	8.83e-24	2.19e-05
ID_27741	L3HYPDH	AT	6	NA	NA	0	0.9976	0.4383	0.0821	ID_27741	L3HYPDH	0.00316405	0.0322232	0.00329194	0.315417
ID_27740	L3HYPDH	AT	7	NA	NA	0	0.9976	0.4383	0.0821	ID_27740	L3HYPDH	0.00316446	31.0316	3.17024	303.75
ID_59225	ROMO1	RI	1.2:1.3:1.4	1.1	1.5	0	1	0.3597	0.0439	ID_59225	ROMO1	0.00318294	145.347	5.31459	3975.06
ID_48	UBE2J2	ES	6.1	5	7	0	0.9881	0.1932	0.0373	ID_48	UBE2J2	0.00318784	806.66	9.43755	68948.1
ID_10153	MRPL55	ES	1.2:2.2:2.5:2.6	1.1	2.9	0	1	1	0.2012	ID_10153	MRPL55	0.00319163	0.248134	0.0982507	0.626668
ID_78498	PDCD2	AT	7	NA	NA	0	1	0.5606	0.1034	ID_78498	PDCD2	0.00322949	0.0791129	0.014622	0.428043
ID_81628	NDUFA5	ES	4	3	5	0	1	0.0468	0.008	ID_81628	NDUFA5	0.00323928	6923340000000	19592.6	2.45e+21
ID_42513	NME1-NME2	ES	2	1	3	0	0.9929	0.1654	0.0212	ID_42513	NME1-NME2	0.00326351	90243.2	45.0655	1.80711e+08
ID_40841	THRA	AA	12.1	11.1	12.2	0	1	0.3055	0.0507	ID_40841	THRA	0.00327358	509.866	7.9986	32501.1
ID_22338	SUOX	RI	7.4	7.3	7.5	0	1	0.0098	0.0005	ID_22338	SUOX	0.00327883	4.86e-135	1.43e-224	1.65e-45
ID_25527	RPL21	AD	1.2:1.3:1.4	1.1	2	0	1	0.0143	0.0016	ID_25527	RPL21	0.00328139	2.82e+59	6.57894e+19	1.2e+99
ID_40139	RNF135	ES	02:03:00	1	5	0	0.8409	0.3907	0.0449	ID_40139	RNF135	0.00328979	0.010808	0.000527972	0.221248
ID_16977	EIF1AD	ES	1.2:2.1	1.1	2.2	0	0.8836	1	0.1728	ID_16977	EIF1AD	0.00329209	4.99955	1.70937	14.6226
ID_54286	GGCX	AA	4.1	3.2	4.2	0	0.9216	0.2521	0.0299	ID_54286	GGCX	0.00329258	3600.07	15.2998	847103
ID_88016	RALGDS	AP	8	NA	NA	0	0.772	0.6993	0.1506	ID_88016	RALGDS	0.00329334	0.0753094	0.0134223	0.422544
ID_72736	TMEM161B	RI	11.2:11.3	11.1	11.4	0	0.9762	0.593	0.0698	ID_72736	TMEM161B	0.00329421	0.0779429	0.0142131	0.42743
ID_212413	PRODH2	ES	10	9	11	1	0.924	0.3695	0.0561	ID_212413	PRODH2	0.00330758	0.0194601	0.00140497	0.26954
ID_64551	MAP4	AA	24.1	23	24.2	1	0.9311	0.297	0.0442	ID_64551	MAP4	0.00333247	1388.78	11.0717	174201
ID_40385	CCL14	ES	5.4	5.2	5.6	0	0.9976	0.1341	0.0166	ID_40385	CCL14	0.00333267	1.75875e+06	118.875	26020564671
ID_87749	ODF2	AP	2	NA	NA	0	0.8219	0.4772	0.0561	ID_87749	ODF2	0.0033386	0.00701224	0.000255387	0.192537
ID_19012	TMEM25	AA	9.1	8.2	9.2	0	0.9881	0.5238	0.0908	ID_19012	TMEM25	0.00334023	0.0792383	0.0145728	0.43085
ID_56943	SUMO1	ES	2	1	4	0	0.9976	0.0129	0.002	ID_56943	SUMO1	0.00334488	1.44e+49	2.09442e+16	9.89e+81
ID_80101	WBSCR16	AT	9	NA	NA	0	1	0.01	0.0011	ID_80101	WBSCR16	0.00335332	2.89e+89	4.85e+29	1.72e+149
ID_60833	UBE2G2	ES	2	1	3	0	0.8907	0.3024	0.0395	ID_60833	UBE2G2	0.00335469	441.806	7.54569	25868.1
ID_43489	ITGB4	ES	35	34	36	0	0.8622	1	0.2734	ID_43489	ITGB4	0.00335788	0.31533	0.145817	0.681902
ID_46791	STAP2	AA	14.2	13	14.3	0	0.9976	0.5312	0.0869	ID_46791	STAP2	0.00335859	16.1231	2.51499	103.361
ID_25015	OGFOD2	AA	5.1	3	5.2	0	0.9644	0.3485	0.0598	ID_25015	OGFOD2	0.0033604	71.1575	4.11482	1230.52
ID_53891	FAM136A	ES	1.3	1.1	2	0	1	0.5677	0.0912	ID_53891	FAM136A	0.00336976	0.0396975	0.00459216	0.343169
ID_79158	AQP1	AP	7.1	NA	NA	0	0.9359	1	0.2078	ID_79158	AQP1	0.00337391	0.330999	0.158046	0.69322
ID_62070	TST	RI	1.2	1.1	1.3	0	1	0.1978	0.0322	ID_62070	TST	0.00337613	1441.96	11.136	186714
ID_63867	UBP1	ES	8	7	9	0	0.8884	0.9397	0.1402	ID_63867	UBP1	0.00338185	0.109	0.0247563	0.479914
ID_67169	PLSCR1	ES	4	1	5	0	0.9335	0.6023	0.0893	ID_67169	PLSCR1	0.00338262	0.0562764	0.00821421	0.385555
ID_41694	NBR1	AT	24	NA	NA	0	1	0.0188	0.0034	ID_41694	NBR1	0.00339588	4.31e-32	4.45e-53	4.17e-11
ID_41693	NBR1	AT	23	NA	NA	0	1	0.0188	0.0034	ID_41693	NBR1	0.00339686	2.32e+31	23958233234	2.25e+52
ID_392312	RPL13	AD	1.3:1.4	1.2	2	1	0.9952	0.523	0.0908	ID_392312	RPL13	0.00340437	15.1083	2.45493	92.9805
ID_22853	TMEM5	AD	1.2	1.1	2	0	0.9335	0.6703	0.1418	ID_22853	TMEM5	0.00341035	0.14242	0.0386371	0.524976
ID_18299	SMCO4	AP	NA	NA	NA	0	0.9976	0.9527	0.2506	ID_18299	SMCO4	0.00342197	3.45271	1.50593	7.91615
ID_18300	SMCO4	AP	2	NA	NA	0	0.9976	0.9527	0.2506	ID_18300	SMCO4	0.00342197	0.289628	0.126324	0.66404
ID_64872	NICN1	ES	3	2	4	0	0.9406	0.3146	0.0568	ID_64872	NICN1	0.00342224	0.016072	0.0010112	0.255449
ID_55138	TMEM177	AD	1.2:1.3	1.1	2.1	0	0.9264	1	0.1357	ID_55138	TMEM177	0.00342317	5.9094	1.79844	19.4174
ID_319385	ECHDC2	ES	12	11	14	1	0.9691	0.616	0.1243	ID_319385	ECHDC2	0.00343256	12.6938	2.31408	69.6312
ID_45520	MBD1	ES	13.1:13.2	12	14	0	0.9596	0.4926	0.0889	ID_45520	MBD1	0.00343493	0.0603094	0.00919172	0.395706
ID_46430	CIRBP	ES	9.5:9.6	9.3	9.8	0	1	0.8091	0.1369	ID_46430	CIRBP	0.0034378	0.145908	0.0401853	0.529773
ID_90674	BRCC3	AA	11.1	10	11.2	0	0.7601	0.0646	0.0038	ID_90674	BRCC3	0.0034672	7.26e+100	1.7e+33	3.11e+168
ID_10792	PHYH	AD	7.2	7.1	8	0	1	0.1144	0.0136	ID_10792	PHYH	0.00346878	7.61464e+06	184.927	313544000000
ID_57401	PECR	ES	4	3	5	0	0.9952	0.0807	0.008	ID_57401	PECR	0.00347142	2.36e-12	3.77e-20	0.000148087
ID_8907	ATP1B1	AP	2.1	NA	NA	0	0.9501	0.291	0.0169	ID_8907	ATP1B1	0.0034725	0.000117597	2.72e-07	0.0507907
ID_10316	NTPCR	AT	5	NA	NA	0	1	0.3877	0.0667	ID_10316	NTPCR	0.00352242	47.8906	3.56183	643.912
ID_10317	NTPCR	AT	6	NA	NA	0	1	0.3877	0.0667	ID_10317	NTPCR	0.00352314	0.0208824	0.00155311	0.280777
ID_71964	NNT	AP	2	NA	NA	0	0.8884	0.9	0.1607	ID_71964	NNT	0.0035243	0.196592	0.0659244	0.586253
ID_71963	NNT	AP	NA	NA	NA	0	0.8884	0.9	0.1607	ID_71963	NNT	0.0035243	5.08668	1.70575	15.1689
ID_2554	RNF220	AP	NA	NA	NA	0	0.9905	0.6767	0.0473	ID_2554	RNF220	0.0035313	27.1489	2.95448	249.472
ID_30149	CAPN3	AP	NA	NA	NA	0	0.8931	0.9667	0.1571	ID_30149	CAPN3	0.00353385	5.75643	1.77584	18.6597
ID_64545	MAP4	AP	13	NA	NA	0	0.8504	0.4711	0.0516	ID_64545	MAP4	0.00354908	50.0494	3.60611	694.638
ID_66286	B4GALT4	AD	8.2	8.1	9.1	0	0.9644	0.3784	0.0598	ID_66286	B4GALT4	0.00355649	143.688	5.09154	4055.02
ID_84411	DECR1	ES	4.2	1	5.2	0	0.8551	1	0.1695	ID_84411	DECR1	0.00356461	4.88073	1.68058	14.1746
ID_82774	TUSC3	ES	7	6	9	0	0.8456	0.1776	0.0124	ID_82774	TUSC3	0.00357103	1.38e-06	1.57e-10	0.012059
ID_78230	TIAM2	AP	6.1	NA	NA	0	0.9525	0.0716	0.0045	ID_78230	TIAM2	0.00357545	7.79004e+17	716246	8.47e+29
ID_19311	CHEK1	AT	13.3	NA	NA	0	1	0.691	0.1382	ID_19311	CHEK1	0.00357699	8.1513	1.98689	33.4411
ID_19312	CHEK1	AT	14	NA	NA	0	1	0.691	0.1382	ID_19312	CHEK1	0.0035773	0.122682	0.0299039	0.503309
ID_80091	GTF2IRD2	AT	17	NA	NA	0	1	0.6394	0.1313	ID_80091	GTF2IRD2	0.003595	0.144447	0.0392714	0.531304
ID_1603	BSDC1	AA	4.1	3	4.2	0	0.9121	0.4871	0.0603	ID_1603	BSDC1	0.00359695	61.0871	3.83429	973.227
ID_87430	GSN	ES	15.1:15.2	10	16	0	0.8124	0.8158	0.11	ID_87430	GSN	0.00359765	0.046022	0.00579271	0.365636
ID_37721	CMC2	ES	07:09:10	5	12	0	0.9382	1	0.2351	ID_37721	CMC2	0.00362989	0.258466	0.103862	0.643204
ID_58414	D2HGDH	ES	00:10:11.100000	9	11.2	0	1	0.9829	0.2011	ID_58414	D2HGDH	0.0036325	0.230777	0.0859118	0.619914
ID_32906	PIGQ	RI	6.2	6.1	6.3	0	0.9002	0.8695	0.1185	ID_32906	PIGQ	0.00363651	6.32284	1.8244	21.9131
ID_82824	FGL1	AP	4	NA	NA	0	0.9477	1	0.2204	ID_82824	FGL1	0.00363908	3.85984	1.55313	9.59248
ID_22342	SUOX	ES	4	1	5.2	0	0.8931	0.8957	0.2235	ID_22342	SUOX	0.00364171	3.53117	1.50862	8.26525
ID_29467	KLC1	AT	19	NA	NA	0	1	0.6928	0.1087	ID_29467	KLC1	0.00364258	0.0818605	0.0151491	0.442346
ID_15672	PACSIN3	AP	2	NA	NA	0	0.924	0.3012	0.0504	ID_15672	PACSIN3	0.00364812	0.00099189	9.36e-06	0.105064
ID_15671	PACSIN3	AP	NA	NA	NA	0	0.924	0.3012	0.0504	ID_15671	PACSIN3	0.00364812	1008.18	9.518	106789
ID_12250	CAMK2G	ES	4:5:6:7:8:9:10	3	11	0	0.962	0.0487	0.0038	ID_12250	CAMK2G	0.00366082	8.3e-21	2.37e-34	2.9e-07
ID_82547	FBXO25	ES	10	9	11	0	0.9976	0.0902	0.0163	ID_82547	FBXO25	0.00366118	2.75454e+06	124.878	60759587026
ID_59031	PIGU	ES	12	11	13	0	1	0.0511	0.0074	ID_59031	PIGU	0.00366386	1.8e-21	1.83e-35	1.77e-07
ID_101480	AFMID	ES	7:8:10:11.1:11.2:12	6	13	1	0.8337	0.5946	0.1016	ID_101480	AFMID	0.00366838	0.0329855	0.003302	0.32951
ID_28340	COQ6	AP	NA	NA	NA	0	0.9477	0.3207	0.0481	ID_28340	COQ6	0.00366956	164.215	5.25817	5128.5
ID_36013	INO80E	ES	6.2:6.3:10	5	11	0	0.9857	1	0.2185	ID_36013	INO80E	0.00367255	0.315333	0.144743	0.686979
ID_79984	TBL2	ES	2.3:2.4:3	1	4.3	0	0.8955	0.0973	0.0158	ID_79984	TBL2	0.00370269	7.27673e+07	357.203	14823700000000
ID_73894	PRELID2	AT	9.2	NA	NA	0	1	0.132	0.0282	ID_73894	PRELID2	0.00370408	0.000166968	4.7e-07	0.059364
ID_73895	PRELID2	AT	7.2	NA	NA	0	1	0.132	0.0282	ID_73895	PRELID2	0.00370745	5984.41	16.8312	2.12779e+06
ID_47034	SLC25A41	ES	3	2	4	0	0.7743	0.4695	0.0913	ID_47034	SLC25A41	0.00371294	125.396	4.79654	3278.23
ID_62917	RABL2B	ES	9	7.1	10.1	0	0.9501	0.431	0.0372	ID_62917	RABL2B	0.00371405	0.00954292	0.000412046	0.221013
ID_382	RNF207	ES	11:12:00	10	13	0	0.7838	0.2436	0.0226	ID_382	RNF207	0.00372102	8.18e-05	1.42e-07	0.0472388
ID_42696	2019-09-04	AA	13.3	13.1	13.4	0	1	0.0169	0.001	ID_42696	2019-09-04	0.00372777	2.17e-89	2.63e-149	1.79e-29
ID_21422	PFKM	ES	16.3	16.1	17	0	0.8409	0.6085	0.1083	ID_21422	PFKM	0.00373172	0.111284	0.0252327	0.490798
ID_63711	UBE2E2	AT	8	NA	NA	0	1	0.1035	0.0166	ID_63711	UBE2E2	0.00374378	4.52e-07	2.32e-11	0.00880404
ID_63712	UBE2E2	AT	5	NA	NA	0	1	0.1035	0.0166	ID_63712	UBE2E2	0.00374478	2.21388e+06	113.541	43167362269
ID_47718	ECSIT	ES	6.3:6.4	6.1	7	0	1	0.0333	0.0063	ID_47718	ECSIT	0.00374775	1.6e-17	7.06e-29	3.64e-06
ID_42297	PHB	ES	5.2:6:7.1	5.1	7.2	0	1	0.0182	0.0034	ID_42297	PHB	0.00375865	9.31e-34	4.24e-56	2.04e-11
ID_3605	GNG5	ES	2	1.3	3	1	1	0.1191	0.0234	ID_3605	GNG5	0.00378133	58007.6	34.6315	9.71625e+07
ID_68262	SENP5	ES	2	1	3	0	0.9596	0.7356	0.1059	ID_68262	SENP5	0.00381248	0.148237	0.0406767	0.540216
ID_28162	SRSF5	AD	2.2:2.3	2.1	4	0	0.981	0.9518	0.1182	ID_28162	SRSF5	0.00381638	10.7435	2.15055	53.6713
ID_492	DNAJC11	AP	NA	NA	NA	0	0.9335	0.0222	0.0012	ID_492	DNAJC11	0.00382434	8.28e-50	4.55e-83	1.51e-16
ID_491	DNAJC11	AP	2	NA	NA	0	0.9335	0.0222	0.0012	ID_491	DNAJC11	0.00382434	1.21e+49	6630470000000000	2.2e+82
ID_74771	DBN1	AP	2	NA	NA	0	0.8242	0.1492	0.0176	ID_74771	DBN1	0.00383177	73232	36.9356	1.45197e+08
ID_10791	PHYH	AP	3	NA	NA	0	0.9976	0.2223	0.0129	ID_10791	PHYH	0.00384729	32777.7	28.4191	3.78047e+07
ID_25037	ARL6IP4	AD	1.2:1.3	1.1	2.1	0	0.8931	0.8797	0.2622	ID_25037	ARL6IP4	0.00385564	0.362619	0.182242	0.721528
ID_12704	ZDHHC16	ES	9	8.2	10	0	0.9881	0.6462	0.1156	ID_12704	ZDHHC16	0.00385773	0.0922382	0.0183156	0.464517
ID_85633	C8orf82	RI	2.2	2.1	2.3	0	1	0.1378	0.0184	ID_85633	C8orf82	0.00385942	201026	50.8088	795364206
ID_51029	IRF3	ES	1.4	1.1	2	0	0.9929	0.3489	0.0335	ID_51029	IRF3	0.00386124	0.000229309	7.79e-07	0.067508
ID_13668	RNH1	AA	6.1	5.3	6.2	0	0.9976	0.0456	0.0053	ID_13668	RNH1	0.0038628	3.52e+28	1516181488	8.15e+47
ID_79083	CHN2	AP	3	NA	NA	0	0.8741	1	0.2851	ID_79083	CHN2	0.00386574	0.385382	0.20181	0.735937
ID_18451	TMEM123	AP	3	NA	NA	0	0.981	0.0766	0.0046	ID_18451	TMEM123	0.00387734	261326000000000	42929.2	1.59e+24
ID_87994	C9orf9	RI	5.2	5.1	5.3	0	1	0.6498	0.123	ID_87994	C9orf9	0.00387829	0.159899	0.0460798	0.554858
ID_62709	TRMU	AA	6.1	5	6.2	0	0.9952	0.5922	0.0968	ID_62709	TRMU	0.00388264	26.1908	2.85469	240.292
ID_43114	PITPNC1	ES	10	9	11	0	1	0.1536	0.0251	ID_43114	PITPNC1	0.00388357	8.56e-05	1.48e-07	0.0493712
ID_75749	ATP6V1G2-DDX39B	AA	4.1	3	4.2	0	0.9929	0.7333	0.1337	ID_75749	ATP6V1G2-DDX39B	0.00388371	7.51989	1.91184	29.5782
ID_79304	CDK13	AA	13.1	12	13.2	0	0.9169	0.9057	0.1186	ID_79304	CDK13	0.00388591	0.0845984	0.0158207	0.452375
ID_36615	KIFC3	ES	7	5	13	0	0.9097	1	0.2089	ID_36615	KIFC3	0.00390946	0.230781	0.085239	0.624831
ID_7863	FLAD1	AT	2.3	NA	NA	0	1	0.2711	0.0471	ID_7863	FLAD1	0.0039375	257.349	5.9134	11199.8
ID_86118	NOL6	ES	23.2:24:25:26.1	23.1	26.2	0	1	0.0044	0.0003	ID_86118	NOL6	0.0039604	1.06e-211	0	3.45e-68
ID_28161	SRSF5	AD	2.3	2.2	4	0	0.9929	0.7718	0.0868	ID_28161	SRSF5	0.00397223	14.9684	2.3742	94.3703
ID_81304	ATXN7L1	AP	6	NA	NA	0	0.9881	0.2486	0.028	ID_81304	ATXN7L1	0.00398039	2163.63	11.6204	402852
ID_59941	ZBP1	AT	8	NA	NA	0	0.9644	0.7054	0.1382	ID_59941	ZBP1	0.0039811	0.12319	0.0296209	0.512332
ID_59080	EIF6	RI	2.3	2.2	2.4	0	1	0.1372	0.0204	ID_59080	EIF6	0.0039864	32015	27.4444	3.73469e+07
ID_26368	CUL4A	AD	4.2	4.1	5	0	0.9121	0.1045	0.0143	ID_26368	CUL4A	0.00399455	1.72e-07	4.27e-12	0.00694036
ID_25038	ARL6IP4	AD	1.2	1.1	2.1	0	0.9929	0.515	0.1047	ID_25038	ARL6IP4	0.00399828	0.109951	0.0244518	0.494414
ID_14167	ILK	ES	5.5	5.3	6	0	1	0.0272	0.0027	ID_14167	ILK	0.00399894	1.2e-34	9.53e-58	1.51e-11
ID_70588	SCLT1	AT	5	NA	NA	0	1	0.5032	0.0799	ID_70588	SCLT1	0.00400063	16.4104	2.44138	110.307
ID_33061	UBE2I	ES	4.2:4.3	2	5.2	0	0.9762	0.347	0.0559	ID_33061	UBE2I	0.00401509	56.5254	3.61836	883.028
ID_9466	ETNK2	AP	3	NA	NA	0	0.9359	0.8309	0.1772	ID_9466	ETNK2	0.00403208	0.138826	0.0361409	0.533262
ID_40932	JUP	RI	15.2	15.1	15.3	0	1	0.5433	0.0997	ID_40932	JUP	0.00403619	12.4688	2.23283	69.6296
ID_15868	SERPING1	AA	6.1	5	6.2	0	1	0.0049	0.0003	ID_15868	SERPING1	0.00403679	7.77e+210	1.36e+67	Inf
ID_69727	SEC31A	ES	27	26.2	28	0	0.9857	0.9315	0.108	ID_69727	SEC31A	0.0040443	0.138794	0.0361107	0.533461
ID_57671	STK16	AA	3.1	2.2	3.2	0	0.962	0.2759	0.0439	ID_57671	STK16	0.00404858	253.8	5.81991	11067.9
ID_75486	RNF144B	AP	NA	NA	NA	0	0.7506	0.205	0.0155	ID_75486	RNF144B	0.00405036	944324	79.5437	11210788781
ID_75487	RNF144B	AP	2	NA	NA	0	0.7506	0.205	0.0155	ID_75487	RNF144B	0.00405036	1.06e-06	8.92e-11	0.0125717
ID_19077	SLC37A4	ES	2.1:2.2	1	3.1	0	0.9169	0.7658	0.1267	ID_19077	SLC37A4	0.00405375	7.31591	1.88303	28.4236
ID_86513	CBWD3	ES	08:09:00	7	10	0	0.9264	0.3618	0.06	ID_86513	CBWD3	0.00407336	0.0268797	0.00227909	0.317021
ID_61529	CHEK2	ES	12	11	13	0	0.8646	0.6573	0.145	ID_61529	CHEK2	0.00409242	8.20199	1.94983	34.5018
ID_10139	MRPL55	ES	1.2:2.2:2.4:2.5:2.6:2.8	1.1	2.9	0	0.7886	0.0541	0.0078	ID_10139	MRPL55	0.00412068	2.19e-27	1.33e-45	3.58e-09
ID_50985	IRF3	ES	5.2:6.2	5.1	7	0	0.9905	0.2088	0.024	ID_50985	IRF3	0.00412576	0.000125992	2.73e-07	0.058207
ID_55767	IFIH1	AT	2.2	NA	NA	0	1	0.248	0.0258	ID_55767	IFIH1	0.00413109	886.107	8.57401	91577.4
ID_55768	IFIH1	AT	16	NA	NA	0	1	0.248	0.0258	ID_55768	IFIH1	0.00413201	0.00112864	1.09e-05	0.116649
ID_66223	GRAMD1C	AP	8	NA	NA	0	0.9121	0.9732	0.3217	ID_66223	GRAMD1C	0.00414526	0.400157	0.213941	0.748458
ID_12201	SEC24C	ES	2:3:4:5:6:7:9:10:11:12:13:14:15:16:17	1	18	0	0.886	0.6213	0.0392	ID_12201	SEC24C	0.00414839	0.000388677	1.81e-06	0.083431
ID_56493	TFPI	AT	8	NA	NA	0	1	0.6435	0.1026	ID_56493	TFPI	0.0041534	8.40503	1.96036	36.0365
ID_56494	TFPI	AT	10	NA	NA	0	1	0.6435	0.1026	ID_56494	TFPI	0.00415369	0.118978	0.0277499	0.510117
ID_55029	IL1RN	AP	NA	NA	NA	0	0.9074	0.3085	0.0261	ID_55029	IL1RN	0.00417928	264.34	5.81759	12011.1
ID_36212	HSD3B7	ES	6	5	7	0	0.9952	0.2072	0.0232	ID_36212	HSD3B7	0.00418872	8.43e-05	1.37e-07	0.0518101
ID_48002	TECR	AA	5.2	4	5.3	0	0.9976	0.1375	0.0189	ID_48002	TECR	0.00422112	530906	63.5658	4434170063
ID_61026	DGCR6	AP	2.1	NA	NA	0	0.9739	0.5576	0.0533	ID_61026	DGCR6	0.00424497	0.0223137	0.00164661	0.30238
ID_61027	DGCR6	AP	NA	NA	NA	0	0.9739	0.5576	0.0533	ID_61027	DGCR6	0.00424497	44.8154	3.3071	607.307
ID_64994	HYAL1	ES	5	4.5	6	0	0.9952	0.2521	0.026	ID_64994	HYAL1	0.0042488	0.000807826	6.13e-06	0.106519
ID_30221	CCNDBP1	ES	5	4	6	0	0.9834	0.1392	0.022	ID_30221	CCNDBP1	0.00425726	2.22e-05	1.43e-08	0.0344435
ID_25214	SFSWAP	ES	15	14	16.1	0	0.9952	0.1779	0.0359	ID_25214	SFSWAP	0.00426122	590.066	7.42619	46885.2
ID_39954	RAB34	AP	2.1	NA	NA	0	0.9074	0.6944	0.1317	ID_39954	RAB34	0.00426483	0.139448	0.0361113	0.538498
ID_39953	RAB34	AP	NA	NA	NA	0	0.9074	0.6944	0.1317	ID_39953	RAB34	0.00426556	7.17084	1.85695	27.6911
ID_18514	CASP1	AP	NA	NA	NA	0	0.8907	0.5069	0.0885	ID_18514	CASP1	0.00428762	0.0365087	0.00376608	0.353919
ID_18515	CASP1	AP	2	NA	NA	0	0.8907	0.5069	0.0885	ID_18515	CASP1	0.00428794	27.3898	2.82542	265.518
ID_17132	RCE1	ES	7	6	8	0	0.9952	0.2837	0.0509	ID_17132	RCE1	0.00429955	0.00876521	0.000339325	0.226417
ID_53568	ACYP2	AT	6	NA	NA	0	1	0.0957	0.0138	ID_53568	ACYP2	0.0043101	1.79832e+07	187.741	1722570000000
ID_84676	COX6C	AT	6	NA	NA	0	0.9976	0.7769	0.1549	ID_84676	COX6C	0.00432016	5.32525	1.68847	16.7953
ID_70842	PET112	AT	3	NA	NA	0	1	0.1251	0.0211	ID_70842	PET112	0.00432442	41342.1	27.8954	6.12707e+07
ID_7942	SLC50A1	ES	5	4	6	0	1	0.204	0.0186	ID_7942	SLC50A1	0.00434789	0.00052637	2.94e-06	0.0943398
ID_81756	UBE2H	ES	04:05:00	3	6	0	0.9976	0.2115	0.0262	ID_81756	UBE2H	0.0043526	0.000419789	2e-06	0.0879524
ID_7416	MTMR11	ES	8:9:10:11:12:13	7	14	0	0.9074	0.4413	0.0283	ID_7416	MTMR11	0.00437165	0.00532836	0.000145602	0.194993
ID_90581	DNASE1L1	ES	2.2	1	3.2	0	0.848	0.6728	0.1453	ID_90581	DNASE1L1	0.00438026	0.159709	0.0452206	0.564055
ID_61871	SFI1	ES	07:08:00	6	9	0	0.848	0.2647	0.0157	ID_61871	SFI1	0.00438158	0.000114114	2.21e-07	0.0588033
ID_36986	TMEM208	AD	4.2	4.1	5.1	0	1	0.1196	0.0158	ID_36986	TMEM208	0.00439038	2.63139e+06	100.671	68780795234
ID_43796	AFMID	ES	09:10:00	8	12	1	0.9834	0.868	0.1754	ID_43796	AFMID	0.0043954	0.168877	0.0496645	0.574239
ID_63657	TBC1D5	AP	3	NA	NA	0	0.9952	0.0768	0.0042	ID_63657	TBC1D5	0.00439841	27645900000000	15541.6	4.92e+22
ID_22881	HMGA2	AT	9.3	NA	NA	0	0.8385	0.999	0.3656	ID_22881	HMGA2	0.00439943	0.465002	0.274537	0.787605
ID_73447	H2AFY	AA	6.1	5	6.2	0	0.9929	0.0578	0.0091	ID_73447	H2AFY	0.00440227	4.59e-16	1.27e-26	1.65e-05
ID_17819	SLCO2B1	AP	2	NA	NA	0	0.9216	1	0.3055	ID_17819	SLCO2B1	0.00440452	0.35002	0.169943	0.720914
ID_17818	SLCO2B1	AP	NA	NA	NA	0	0.9216	1	0.3055	ID_17818	SLCO2B1	0.0044048	2.85695	1.38712	5.88426
ID_79809	SUMF2	ES	4	3	5.1	0	0.9905	0.3243	0.0359	ID_79809	SUMF2	0.00440664	0.00197537	2.72e-05	0.14358
ID_58423	D2HGDH	ES	7.1:7.3	6	8	0	0.9359	0.8765	0.1334	ID_58423	D2HGDH	0.00443517	0.0385394	0.00409129	0.363036
ID_49846	DYRK1B	AA	10.1:10.2	9	10.3	0	0.9192	0.8116	0.1361	ID_49846	DYRK1B	0.00446294	6.94214	1.82582	26.3954
ID_43589	CYGB	AP	NA	NA	NA	0	0.9667	1	0.2808	ID_43589	CYGB	0.00446348	0.366397	0.183393	0.732017
ID_36943	HSF4	ES	14.1	13	14.3	0	0.9549	0.2303	0.0423	ID_36943	HSF4	0.0044763	0.00368745	7.74e-05	0.175601
ID_56119	MTX2	ES	5	4	6	0	0.9525	0.216	0.027	ID_56119	MTX2	0.00448255	1.61e-06	1.63e-10	0.0159224
ID_34285	COQ7	RI	7.2	7.1	7.3	0	1	0.0467	0.0045	ID_34285	COQ7	0.00448778	5.99e-17	3.88e-28	9.26e-06
ID_87750	ODF2	AP	NA	NA	NA	0	0.8219	0.4772	0.0545	ID_87750	ODF2	0.00449349	144.079	4.67254	4442.73
ID_66538	UMPS	ES	2	1	3	0	0.9121	0.7213	0.0616	ID_66538	UMPS	0.00449651	16.3146	2.37713	111.97
ID_82819	MTUS1	AP	2.1	NA	NA	0	0.7862	0.5728	0.1219	ID_82819	MTUS1	0.00450439	9.58776	2.01523	45.6153
ID_87224	DNAJC25	AT	7	NA	NA	0	1	0.535	0.0937	ID_87224	DNAJC25	0.00451252	18.5813	2.47301	139.613
ID_27618	LGALS3	AT	6	NA	NA	0	1	0.32	0.0658	ID_27618	LGALS3	0.00451335	0.0132193	0.000667635	0.261746
ID_87223	DNAJC25	AT	5	NA	NA	0	1	0.535	0.0937	ID_87223	DNAJC25	0.00451405	0.0538238	0.00716351	0.404412
ID_27617	LGALS3	AT	7	NA	NA	0	1	0.32	0.0658	ID_27617	LGALS3	0.00451426	75.637	3.82008	1497.6
ID_35972	CDIPT	ES	2.1:2.2	1.5	3.2	0	0.9952	0.1468	0.0149	ID_35972	CDIPT	0.0045144	6.95e-07	3.91e-11	0.0123619
ID_21552	TROAP	AT	2.8	NA	NA	0	0.981	0.7985	0.1694	ID_21552	TROAP	0.00451848	4.7552	1.62089	13.9503
ID_54451	CD8B	AT	7	NA	NA	0	0.9311	0.8806	0.1585	ID_54451	CD8B	0.00452075	6.15433	1.75557	21.5747
ID_13255	FAM45A	ES	4	3	5	0	0.9549	0.0447	0.0026	ID_13255	FAM45A	0.00452486	7.73e-26	3.56e-43	1.68e-08
ID_3546	FUBP1	ES	3	2	4	0	0.8147	0.393	0.0549	ID_3546	FUBP1	0.00452848	0.00168213	2.04e-05	0.138416
ID_73724	HARS	AD	6.2	6.1	7	0	0.9881	0.0681	0.0103	ID_73724	HARS	0.00453554	3.03e-09	3.97e-15	0.00231143
ID_62501	TCF20	ES	4.1:4.2	3	5	0	0.9857	1	0.1836	ID_62501	TCF20	0.00453632	0.237712	0.0881414	0.641096
ID_35803	SULT1A2	ES	1.4:2.1:2.3:3:4	1.1	5.1	1	0.7838	0.8185	0.1704	ID_35803	SULT1A2	0.00454869	0.113768	0.0253482	0.510612
ID_10465	AKT3	AT	17	NA	NA	0	1	0.2887	0.0321	ID_10465	AKT3	0.00455089	4.18e-09	6.81e-15	0.00256615
ID_235160	HPX	ES	04:06:07	3	8	1	0.9097	0.8041	0.1555	ID_235160	HPX	0.00456334	0.221059	0.0779022	0.627284
ID_72623	DMGDH	ES	3.1:3.2:4:5	2	6	0	0.886	0.4039	0.0469	ID_72623	DMGDH	0.00458246	0.00587858	0.000168684	0.204867
ID_22038	PRR13	AA	4.1:4.2	3	4.3	0	1	0.1618	0.0223	ID_22038	PRR13	0.00460979	6.07e-05	7.34e-08	0.0501573
ID_77556	EPB41L2	ES	17:18:20.1:20.2	14	21	0	0.8741	0.4478	0.0407	ID_77556	EPB41L2	0.00461542	0.00638961	0.000193677	0.210801
ID_81555	ST7	AP	2	NA	NA	0	0.9501	0.4213	0.0343	ID_81555	ST7	0.0046178	976.329	8.33618	114347
ID_77889	AHI1	AT	7	NA	NA	0	1	0.188	0.0302	ID_77889	AHI1	0.00463518	1306.96	9.10065	187695
ID_57793	RHBDD1	ES	02:03:00	1	4	0	0.7672	0.9621	0.1757	ID_57793	RHBDD1	0.00463899	5.21356	1.66212	16.3533
ID_68018	SENP2	AP	NA	NA	NA	0	0.8765	0.1613	0.0102	ID_68018	SENP2	0.00464046	1.63854e+08	336.807	79713900000000
ID_68017	SENP2	AP	2	NA	NA	0	0.8765	0.1613	0.0102	ID_68017	SENP2	0.00464046	6.1e-09	1.25e-14	0.00296906
ID_22880	HMGA2	AT	10	NA	NA	0	0.8385	0.9939	0.3453	ID_22880	HMGA2	0.00464114	2.2048	1.27539	3.8115
ID_16920	CFL1	AP	2	NA	NA	0	0.9739	0.1421	0.0217	ID_16920	CFL1	0.00464349	55086.2	28.738	1.05592e+08
ID_46304	BSG	ES	3	2	4	0	1	0.0729	0.01	ID_46304	BSG	0.00464618	4.51e-12	6.28e-20	0.000323759
ID_88669	RPS6KA3	AP	6	NA	NA	0	0.7601	0.977	0.2494	ID_88669	RPS6KA3	0.00464913	0.320964	0.146114	0.705052
ID_69312	FIP1L1	ES	14	13.1	15	0	0.9881	0.8148	0.1166	ID_69312	FIP1L1	0.00465091	0.0930429	0.0179678	0.481805
ID_25016	OGFOD2	ES	4	3	5.2	0	0.9644	0.2318	0.0391	ID_25016	OGFOD2	0.00465618	692.954	7.46898	64290.6
ID_82406	GALNT11	AT	8.2	NA	NA	0	1	0.0623	0.0104	ID_82406	GALNT11	0.00465638	7083714667	1066.68	4.70421e+16
ID_72294	PIK3R1	AP	NA	NA	NA	0	0.7506	1	0.1959	ID_72294	PIK3R1	0.00466071	0.231897	0.084267	0.638166
ID_50836	BAX	RI	6.2	6.1	6.3	0	1	0.5219	0.0879	ID_50836	BAX	0.00466933	12.7985	2.1883	74.8536
ID_46382	POLR2E	AT	9	NA	NA	0	1	0.1468	0.0256	ID_46382	POLR2E	0.00469037	9.21e-06	2.97e-09	0.0284963
ID_46383	POLR2E	AT	8	NA	NA	0	1	0.1468	0.0256	ID_46383	POLR2E	0.00469677	108455	35.0315	3.3577e+08
ID_14941	CAPRIN1	AP	NA	NA	NA	0	0.7791	0.9429	0.1571	ID_14941	CAPRIN1	0.00470225	0.15496	0.0425354	0.564535
ID_30939	GTF2A2	AD	1.2	1.1	3	0	0.9857	0.2074	0.0175	ID_30939	GTF2A2	0.00472202	84786.4	32.3285	2.22365e+08
ID_9467	ETNK2	AP	NA	NA	NA	0	0.9359	0.8309	0.176	ID_9467	ETNK2	0.00473002	6.94445	1.81004	26.6433
ID_37257	CHTF8	AP	2	NA	NA	0	0.8646	0.5754	0.095	ID_37257	CHTF8	0.00473585	13.4206	2.21404	81.3498
ID_37256	CHTF8	AP	NA	NA	NA	0	0.8646	0.5754	0.095	ID_37256	CHTF8	0.00473585	0.0745125	0.0122926	0.451663
ID_43591	CYGB	AP	2	NA	NA	0	0.9667	1	0.2813	ID_43591	CYGB	0.00473976	2.69803	1.3549	5.37264
ID_74698	ZNF346	AT	8.2	NA	NA	0	1	0.4505	0.0842	ID_74698	ZNF346	0.00474976	34.9572	2.96542	412.087
ID_10671	FBXO18	AP	3	NA	NA	0	0.8884	0.5068	0.0782	ID_10671	FBXO18	0.00475083	13.7229	2.22774	84.533
ID_1641	FNDC5	AT	6.2	NA	NA	0	0.981	0.6403	0.1075	ID_1641	FNDC5	0.00475145	10.2032	2.03465	51.1659
ID_74699	ZNF346	AT	9	NA	NA	0	1	0.4505	0.0842	ID_74699	ZNF346	0.00475189	0.0286134	0.00242738	0.337288
ID_1642	FNDC5	AT	7	NA	NA	0	0.981	0.6403	0.1075	ID_1642	FNDC5	0.0047521	0.098011	0.0195446	0.4915
ID_81446	IFRD1	AP	2.1	NA	NA	0	0.7957	0.6753	0.1071	ID_81446	IFRD1	0.00475627	0.111327	0.024249	0.511104
ID_74172	ATOX1	AP	NA	NA	NA	0	0.9097	0.7526	0.0919	ID_74172	ATOX1	0.00476103	10.6874	2.06293	55.3679
ID_1468	SERINC2	AP	NA	NA	NA	0	0.9762	0.0124	0.0012	ID_1468	SERINC2	0.00476392	2.51e+59	1.42294e+18	4.42e+100
ID_37730	CMC2	ES	7	5	9	0	1	0.3839	0.0575	ID_37730	CMC2	0.00478942	0.00350706	6.9e-05	0.178131
ID_73848	RNF14	ES	5	4	6	0	0.962	0.384	0.0569	ID_73848	RNF14	0.00480091	0.0190208	0.00121142	0.29865
ID_87629	SLC2A8	ES	9	8	10	0	1	0.2134	0.0323	ID_87629	SLC2A8	0.00482314	0.000602033	3.47e-06	0.104462
ID_12968	SFXN2	ES	8	7	9	0	0.8931	0.444	0.071	ID_12968	SFXN2	0.00483057	0.0391627	0.00411373	0.37283
ID_17694	RELT	ES	06:07:00	5	8	0	0.772	0.1246	0.0089	ID_17694	RELT	0.00483105	1.03e-07	1.41e-12	0.00744454
ID_38693	RPAIN	ES	6.1	3	7	0	0.8052	0.2034	0.0362	ID_38693	RPAIN	0.0048319	918.44	7.98408	105652
ID_82404	GALNT11	AT	16	NA	NA	0	1	0.0623	0.0104	ID_82404	GALNT11	0.00483237	1.52e-10	2.25e-17	0.00102448
ID_48475	UBA52	ES	2	1.3	4.2	0	1	0.0571	0.0093	ID_48475	UBA52	0.00483729	92844942890	2180.84	3.95269e+18
ID_43955	LGALS3BP	ES	3.1:3.2:4.1:4.2:5.2:5.3	2.2	5.4	0	0.9952	0.0013	0.0001	ID_43955	LGALS3BP	0.00484195	0	0	5.35098665307636e-315
ID_88667	RPS6KA3	AP	2	NA	NA	0	0.7601	0.977	0.208	ID_88667	RPS6KA3	0.00484557	3.77023	1.49751	9.49216
ID_31899	FBXO22	AT	7	NA	NA	0	1	0.12	0.0226	ID_31899	FBXO22	0.00484656	201127	41.0762	9.84803e+08
ID_31900	FBXO22	AT	6.2	NA	NA	0	1	0.12	0.0226	ID_31900	FBXO22	0.00485174	4.98e-06	1.02e-09	0.024383
ID_18121	TMEM126B	ES	4	1	5.1	0	0.9762	0.5075	0.0507	ID_18121	TMEM126B	0.00487589	0.0105141	0.000441037	0.25065
ID_62186	POLR2F	AD	1.2	1.1	2.1	0	1	0.1302	0.0069	ID_62186	POLR2F	0.00489334	26273375007	1452.79	4.75147e+17
ID_16860	SCYL1	AA	14.1	13	14.2	0	1	0.4268	0.0579	ID_16860	SCYL1	0.00489915	103.885	4.09082	2638.12
ID_47668	TMEM205	AA	2.5	2.2	2.6	0	1	0.4347	0.0661	ID_47668	TMEM205	0.00490063	34.9462	2.93915	415.508
ID_58836	FOXA2	AP	NA	NA	NA	0	0.924	1	0.1638	ID_58836	FOXA2	0.00490965	0.19164	0.0606094	0.605945
ID_58837	FOXA2	AP	2.1	NA	NA	0	0.924	1	0.1638	ID_58837	FOXA2	0.00491077	5.21788	1.65024	16.4983
ID_3024	ECHDC2	ES	9.1	8.1	10	0	1	0.7132	0.1407	ID_3024	ECHDC2	0.00491172	0.158154	0.0437514	0.571701
ID_59907	CTCFL	AT	15	NA	NA	0	0.9382	0.7766	0.1808	ID_59907	CTCFL	0.00491449	0.199777	0.0650318	0.61371
ID_43509	UNK	AT	5	NA	NA	0	1	0.6879	0.1216	ID_43509	UNK	0.0049252	8.07791	1.88315	34.6507
ID_60055	OSBPL2	ES	3.1:3.2	2	4	0	0.9335	0.2948	0.0408	ID_60055	OSBPL2	0.00492595	1205.42	8.57946	169362
ID_38575	ARRB2	ES	02:03:00	1	4.2	0	0.8385	0.3844	0.0707	ID_38575	ARRB2	0.00494724	0.0137857	0.000694854	0.273503
ID_33385	IL32	RI	1.6:1.7:1.8	1.5	1.9	0	1	0.3036	0.0472	ID_33385	IL32	0.00495016	121.276	4.27055	3444.01
ID_50597	AP2S1	AP	2	NA	NA	0	1	0.2306	0.024	ID_50597	AP2S1	0.00496684	7395.41	14.777	3.70118e+06
ID_57634	ATG9A	AP	NA	NA	NA	0	0.8884	0.8614	0.1263	ID_57634	ATG9A	0.0049677	0.10455	0.0216318	0.505308
ID_57635	ATG9A	AP	2	NA	NA	0	0.8884	0.8614	0.1263	ID_57635	ATG9A	0.00496803	9.56467	1.97896	46.2278
ID_33294	KCTD5	ES	3	2	4	0	0.9572	0.1333	0.0107	ID_33294	KCTD5	0.00499478	2.22e-08	1e-13	0.004893
ID_24424	GPN3	AP	2.1	NA	NA	0	0.9667	0.1495	0.0262	ID_24424	GPN3	0.00499743	0.000114224	2.02e-07	0.0645951
ID_24425	GPN3	AP	NA	NA	NA	0	0.9667	0.1495	0.0262	ID_24425	GPN3	0.00499895	8748.53	15.4743	4.94605e+06
ID_61138	RANBP1	RI	7.2:7.3	7.1	7.4	0	1	0.2645	0.0441	ID_61138	RANBP1	0.00500154	0.00164411	1.87e-05	0.14452
ID_60968	CECR5	ES	8	7	9	0	1	0.0462	0.0046	ID_60968	CECR5	0.00500321	2.17e-20	4.04e-34	1.17e-06
ID_35960	MVP	ES	3	2.3	4	0	0.9929	0.0186	0.0017	ID_35960	MVP	0.00500474	3.01e-51	1.58e-86	5.73e-16
ID_32507	MAN2A2	AP	2	NA	NA	0	0.8147	0.6831	0.1022	ID_32507	MAN2A2	0.00502771	0.0516868	0.00652301	0.409554
ID_32509	MAN2A2	AP	NA	NA	NA	0	0.8147	0.6831	0.1022	ID_32509	MAN2A2	0.00502771	19.3473	2.44168	153.303
ID_534014	PSME1	ES	2	1.1	3	1	0.962	0.0543	0.0091	ID_534014	PSME1	0.00504743	86991700000000	15700.4	4.82e+23
ID_65424	DNASE1L3	RI	9.2	9.1	9.3	0	0.9952	0.9928	0.1126	ID_65424	DNASE1L3	0.00505757	4.99485	1.62237	15.3778
ID_59940	ZBP1	AT	9	NA	NA	0	0.9644	0.7054	0.1477	ID_59940	ZBP1	0.00506311	6.36774	1.74504	23.2362
ID_23464	GLIPR1	RI	5.2	5.1	5.3	0	0.981	0.8219	0.1542	ID_23464	GLIPR1	0.00507721	0.173086	0.0507519	0.590296
ID_39430	PIGL	ES	2	1	5	0	0.8717	0.2116	0.0297	ID_39430	PIGL	0.00508526	0.00058283	3.18e-06	0.106744
ID_15730	SPI1	ES	2.1:2.2:3:4.1	1	5	0	0.962	0.07	0.0058	ID_15730	SPI1	0.00509647	4.31e-13	9.58e-22	0.000193838
ID_272	PLCH2	AT	23.2	NA	NA	0	0.9501	0.6715	0.1498	ID_272	PLCH2	0.00510628	6.69849	1.76952	25.357
ID_273	PLCH2	AT	22.3	NA	NA	0	0.9501	0.6715	0.1498	ID_273	PLCH2	0.00510803	0.149299	0.0394402	0.565168
ID_82392	PRKAG2	ES	15	14.1	16	0	0.829	0.1074	0.0106	ID_82392	PRKAG2	0.00511808	3.30472e+07	179.849	6072390000000
ID_12719	MMS19	ES	12:13:00	11	14	0	0.962	0.0917	0.0135	ID_12719	MMS19	0.0051211	2.21e-07	4.83e-12	0.0100996
ID_31798	FAM219B	ES	3.1:3.2	2	4	0	0.9026	0.8536	0.1262	ID_31798	FAM219B	0.00512195	0.0935099	0.0177943	0.491399
ID_19014	TMEM25	ES	5	4	6	0	0.7957	0.6098	0.1091	ID_19014	TMEM25	0.00512923	0.0939961	0.017947	0.492297
ID_44331	HEXDC	RI	11.3:11.4	11.2	11.5	0	1	0.5584	0.105	ID_44331	HEXDC	0.00513963	11.6815	2.08818	65.347
ID_11322	HNRNPF	AP	2	NA	NA	0	0.9549	0.1817	0.0265	ID_11322	HNRNPF	0.00515593	5569.05	13.2157	2.34678e+06
ID_66636	SEC61A1	ES	04:05:06	3.2	7	0	0.9834	0.0307	0.0015	ID_66636	SEC61A1	0.00517636	1.97e-41	5.73e-70	6.76e-13
ID_80346	DBF4	ES	00:08:09.100000	7	9.2	0	0.8005	0.0814	0.0045	ID_80346	DBF4	0.00518956	8.98e-152	1.08e-257	7.45e-46
ID_29465	KLC1	AT	17	NA	NA	0	1	0.3759	0.0645	ID_29465	KLC1	0.00519166	47.2972	3.16469	706.872
ID_44230	PCYT2	ES	7	6	8	0	1	0.7676	0.1638	ID_44230	PCYT2	0.00520342	0.19108	0.0598445	0.610107
ID_46570	MKNK2	AA	14.1	13.1	14.2	0	1	0.8821	0.1605	ID_46570	MKNK2	0.00521274	0.254899	0.0976963	0.665054
ID_48589	TMEM161A	AA	3.1	2	3.2	0	0.9715	0.223	0.0359	ID_48589	TMEM161A	0.00521536	553.078	6.58188	46475.4
ID_50065	BCKDHA	ES	2.2:3.1	2.1	3.2	0	0.981	0.017	0.0012	ID_50065	BCKDHA	0.00521568	2.84e-71	9.02e-121	8.95e-22
ID_57684	DNPEP	AP	5.1	NA	NA	0	0.9596	0.0745	0.0076	ID_57684	DNPEP	0.00525097	7.84e-10	3.17e-16	0.00194226
ID_47564	SLC44A2	ES	6:7:8:9:10:11	5	12	0	0.9335	0.0822	0.0059	ID_47564	SLC44A2	0.00525941	2.87e-12	2.25e-20	0.000366712
ID_35613	NDUFAB1	ES	2	1	3	0	1	0.05	0.0052	ID_35613	NDUFAB1	0.00526451	6.56714e+18	398178	1.08e+32
ID_41797	TMUB2	ES	4.4:4.5:4.7:4.8	4.3	5	0	0.9097	0.4439	0.0718	ID_41797	TMUB2	0.0052873	0.0514393	0.00639229	0.413936
ID_12887	POLL	AD	5.2	5.1	6.1	0	0.9762	0.5476	0.1028	ID_12887	POLL	0.00529769	17.2183	2.32916	127.286
ID_79434	DBNL	ES	2.1:2.2:3	1.1	4.1	0	0.9881	0.0254	0.0028	ID_79434	DBNL	0.00530053	1.04e-35	2.66e-60	4.06e-11
ID_19604	NINJ2	AP	3	NA	NA	0	0.9857	0.8608	0.165	ID_19604	NINJ2	0.0053014	4.25832	1.53781	11.7916
ID_23374	CNOT2	ES	7:8:9:10	6	11.2	0	0.9477	0.2716	0.0223	ID_23374	CNOT2	0.00530292	0.00075634	4.84e-06	0.118291
ID_28797	EFCAB11	AT	7	NA	NA	0	1	0.6026	0.0754	ID_28797	EFCAB11	0.00532055	18.784	2.3877	147.774
ID_75167	BPHL	ES	2	1.2	3	0	0.9786	1	0.1016	ID_75167	BPHL	0.00532515	6.63209	1.7529	25.0925
ID_53104	YPEL5	ES	3.1:3.2:4	1	5	0	0.962	0.2284	0.0368	ID_53104	YPEL5	0.0053309	449.202	6.11866	32978.3
ID_46473	GAMT	AT	6	NA	NA	0	1	0.1359	0.0184	ID_46473	GAMT	0.00533901	3.62e-06	5.38e-10	0.0243735
ID_69434	HTN3	AT	7	NA	NA	0	0.962	0.7877	0.0715	ID_69434	HTN3	0.00533985	10.4287	2.00376	54.2773
ID_69433	HTN3	AT	6	NA	NA	0	0.962	0.7877	0.0715	ID_69433	HTN3	0.00533985	0.0958889	0.0184239	0.499062
ID_46472	GAMT	AT	5.2	NA	NA	0	1	0.1359	0.0184	ID_46472	GAMT	0.00534129	276096	41.0045	1859037633
ID_36012	INO80E	ES	6.1:6.2:6.3:10	5	11	0	0.9026	1	0.2424	ID_36012	INO80E	0.00534617	0.304644	0.131996	0.703113
ID_54316	USP39	RI	14.2	14.1	14.3	0	1	0.3231	0.0465	ID_54316	USP39	0.00536201	0.00673227	0.000199254	0.227465
ID_18213	CTSC	AT	4.2	NA	NA	0	1	0.1663	0.0206	ID_18213	CTSC	0.00537474	7.08e-08	6.54e-13	0.00766119
ID_8219	TMEM79	AD	3.2	3.1	4	0	0.9525	0.5662	0.0488	ID_8219	TMEM79	0.00538177	0.00845804	0.00029353	0.243718
ID_48442	ELL	AP	2	NA	NA	0	0.8646	0.2127	0.0383	ID_48442	ELL	0.00538556	405.969	5.908	27896.2
ID_48441	ELL	AP	NA	NA	NA	0	0.8646	0.2127	0.0383	ID_48441	ELL	0.00538556	0.00246324	3.58e-05	0.169262
ID_18212	CTSC	AT	9	NA	NA	0	1	0.1663	0.0206	ID_18212	CTSC	0.00538751	1.4034e+07	129.87	1516550000000
ID_58148	RAMP1	AP	NA	NA	NA	0	0.9857	0.535	0.048	ID_58148	RAMP1	0.00539524	42.0533	3.01985	585.616
ID_60346	EVA1C	ES	5	4	6.1	0	0.8955	0.2086	0.0234	ID_60346	EVA1C	0.00541334	2.78e-05	1.71e-08	0.0451177
ID_76614	EYS	AT	46	NA	NA	0	0.9691	0.7874	0.0927	ID_76614	EYS	0.0054136	0.130375	0.0310231	0.547903
ID_50489	OPA3	AT	3	NA	NA	0	1	0.4807	0.0943	ID_50489	OPA3	0.00541577	23.3432	2.53509	214.944
ID_50488	OPA3	AT	4	NA	NA	0	1	0.4807	0.0943	ID_50488	OPA3	0.00541725	0.042843	0.00465275	0.394502
ID_54449	CD8B	AT	9	NA	NA	0	0.9311	0.8806	0.1584	ID_54449	CD8B	0.00542314	0.168084	0.0478247	0.590742
ID_85542	MROH1	AT	14	NA	NA	0	1	0.573	0.0785	ID_85542	MROH1	0.00542373	26.8399	2.64071	272.797
ID_85543	MROH1	AT	45	NA	NA	0	1	0.573	0.0785	ID_85543	MROH1	0.00542527	0.0372625	0.00366621	0.378729
ID_8031	THBS3	ES	6	5	7.1	0	0.8575	0.1562	0.0223	ID_8031	THBS3	0.00543976	9.2e-05	1.31e-07	0.0645084
ID_74103	SYNPO	AT	5.2	NA	NA	0	1	0.2425	0.0412	ID_74103	SYNPO	0.00544253	176.319	4.596	6764.2
ID_74104	SYNPO	AT	6	NA	NA	0	1	0.2425	0.0412	ID_74104	SYNPO	0.00544253	0.00567155	0.000147837	0.21758
ID_19211	VWA5A	AT	10.2	NA	NA	0	0.9976	0.935	0.1616	ID_19211	VWA5A	0.00544466	4.91895	1.59954	15.1269
ID_19212	VWA5A	AT	18	NA	NA	0	0.9976	0.935	0.1616	ID_19212	VWA5A	0.00544519	0.203299	0.0661085	0.625192
ID_62894	ARSA	AD	1.3:1.4:1.5	1.2	2	0	0.9857	0.2059	0.0395	ID_62894	ARSA	0.0054454	1027.26	7.72579	136590
ID_37673	WWOX	AT	6	NA	NA	0	1	0.441	0.0511	ID_37673	WWOX	0.00545224	41.3315	2.99479	570.423
ID_16795	SYVN1	AA	14.1	13	14.2	0	0.9667	0.5158	0.0742	ID_16795	SYVN1	0.00548305	0.0384075	0.00384936	0.383216
ID_36015	INO80E	ES	6.1:6.2:6.3	5	11	0	0.9905	0.8415	0.1679	ID_36015	INO80E	0.00551027	0.247503	0.0923337	0.663438
ID_18382	FAM76B	ES	9	8	10.1	0	0.7648	1	0.1723	ID_18382	FAM76B	0.00551232	0.179383	0.0533114	0.603591
ID_86098	BAG1	ES	3	2	4	0	1	0.2259	0.0318	ID_86098	BAG1	0.005518	665.038	6.74809	65540.9
ID_82387	PRKAG2	AP	5	NA	NA	0	0.9857	0.4971	0.0357	ID_82387	PRKAG2	0.00553847	113.396	4.00761	3208.54
ID_49886	PLD3	AA	5.1	4	5.2	0	0.9644	0.1993	0.0311	ID_49886	PLD3	0.0055576	2401.88	9.79485	588988
ID_86267	CCDC107	RI	3.2	3.1	3.3	0	1	0.2661	0.0449	ID_86267	CCDC107	0.00556677	172.769	4.5248	6596.8
ID_24740	RPLP0	AA	1.3	1.1	1.4	0	1	0.3282	0.0553	ID_24740	RPLP0	0.00557171	41.2193	2.9725	571.585
ID_235596	ITIH3	ES	13.2:14:16:17:18:19.1	13.1	19.2	1	0.9454	0.694	0.1028	ID_235596	ITIH3	0.00557854	12.526	2.09642	74.8423
ID_8052	SCAMP3	ES	2	1	3	0	0.9976	0.3347	0.0507	ID_8052	SCAMP3	0.00558338	0.0101641	0.000395906	0.260942
ID_2273	ST3GAL3	ES	10	9	13	0	0.8527	0.4185	0.0659	ID_2273	ST3GAL3	0.00559411	37.5969	2.88998	489.114
ID_15866	SERPING1	AP	NA	NA	NA	0	0.9976	0.3869	0.0438	ID_15866	SERPING1	0.00559419	0.0104464	0.000414561	0.263237
ID_15865	SERPING1	AP	2.1	NA	NA	0	0.9976	0.3869	0.0438	ID_15865	SERPING1	0.00559923	95.6927	3.79717	2411.56
ID_20957	DDX11	AP	2	NA	NA	0	0.7767	0.7693	0.1601	ID_20957	DDX11	0.0056155	0.151173	0.0396985	0.575668
ID_20956	DDX11	AP	NA	NA	NA	0	0.7767	0.7693	0.1601	ID_20956	DDX11	0.0056155	6.61496	1.73711	25.1899
ID_80524	PON1	AP	NA	NA	NA	0	0.9715	0.8986	0.1184	ID_80524	PON1	0.00562278	7.65558	1.8125	32.3354
ID_80525	PON1	AP	3	NA	NA	0	0.9715	0.8986	0.1184	ID_80525	PON1	0.00562307	0.130625	0.0309262	0.55173
ID_34062	SHISA9	AT	2	NA	NA	0	1	0.4412	0.0408	ID_34062	SHISA9	0.005639	107.657	3.91949	2957.05
ID_34063	SHISA9	AT	6	NA	NA	0	1	0.4412	0.0408	ID_34063	SHISA9	0.005639	0.00928872	0.000338175	0.255135
ID_77498	PTPRK	ES	19	18	21	0	0.8005	0.2986	0.0234	ID_77498	PTPRK	0.00564933	17875.4	17.4078	1.83556e+07
ID_7826	HAX1	AA	2.1	1	2.2	0	1	0.1287	0.0162	ID_7826	HAX1	0.00565515	1.85585e+07	131.894	2611320000000
ID_40146	NF1	AT	60	NA	NA	0	1	0.3004	0.0313	ID_40146	NF1	0.0056702	440.22	5.89616	32867.8
ID_22634	MBD6	RI	13.4	13.3	13.5	0	1	0.3428	0.05	ID_22634	MBD6	0.00567507	1326.55	8.12789	216504
ID_43362	NT5C	AD	3.3	3.2	4.1	0	1	0.6586	0.1014	ID_43362	NT5C	0.0056757	11.6923	2.0473	66.7757
ID_79224	BBS9	ES	17:18:00	15	19.2	0	0.7601	0.4765	0.0743	ID_79224	BBS9	0.00567718	0.0377782	0.00370713	0.384986
ID_70662	RNF150	AT	8.2	NA	NA	0	0.8789	0.7027	0.0475	ID_70662	RNF150	0.00569836	37.7292	2.87682	494.815
ID_70663	RNF150	AT	9	NA	NA	0	0.8789	0.7027	0.0475	ID_70663	RNF150	0.00569836	0.0265047	0.00202096	0.347606
ID_77462	ECHDC1	ES	8	7	10.2	0	0.9501	0.1631	0.0263	ID_77462	ECHDC1	0.00571549	2532.24	9.7674	656494
ID_27427	LRR1	ES	04:05:00	3	7	0	0.8504	1	0.2431	ID_27427	LRR1	0.0057177	0.332879	0.152575	0.726258
ID_17429	NADSYN1	AD	3.2	3.1	4	0	0.9169	0.1279	0.0157	ID_17429	NADSYN1	0.0057212	859236	53.1145	13899897233
ID_592	RBP7	ES	2	1	3	0	0.9905	0.9531	0.141	ID_592	RBP7	0.00572581	3.97333	1.49331	10.572
ID_10120	MRPL55	ES	2.2:2.5:2.6	1.2	2.9	0	0.9976	0.7601	0.1526	ID_10120	MRPL55	0.00576456	0.163523	0.0452161	0.591375
ID_7792	TPM3	ES	12	11	15	0	1	0.1593	0.0178	ID_7792	TPM3	0.00576535	43674.4	22.1847	8.59807e+07
ID_29380	MOK	RI	15.2:15.3:15.4	15.1	15.5	0	0.7672	0.9941	0.2112	ID_29380	MOK	0.00577654	0.197953	0.062671	0.625258
ID_65160	ABHD14A	ES	03:04:00	2	5	0	1	0.0632	0.0083	ID_65160	ABHD14A	0.00578251	6.98e-13	1.63e-21	0.000299761
ID_86526	FXN	AP	NA	NA	NA	0	0.9644	0.5406	0.1013	ID_86526	FXN	0.00578625	31.1179	2.70797	357.583
ID_86525	FXN	AP	2	NA	NA	0	0.9644	0.5406	0.1013	ID_86525	FXN	0.0057865	0.0321362	0.00279657	0.369287
ID_35810	SULT1A2	ES	1.4:2.1:2.3	1.1	5.1	1	0.8409	0.8483	0.1955	ID_35810	SULT1A2	0.00581044	0.25172	0.0944551	0.670824
ID_41033	STAT5A	ES	5	4	6	0	0.7577	0.4643	0.0664	ID_41033	STAT5A	0.00582073	0.0134897	0.000632345	0.287772
ID_97992	MRPS28	ES	4.2	1	5	1	0.9192	0.7341	0.1446	ID_97992	MRPS28	0.00583935	0.150919	0.0393405	0.578961
ID_77467	ECHDC1	ES	7	6.3	10.2	0	0.9881	0.5826	0.1052	ID_77467	ECHDC1	0.00584936	0.0967922	0.0183923	0.509383
ID_83148	TRIM35	ES	2	1	3	0	0.8242	0.1484	0.0246	ID_83148	TRIM35	0.00585027	0.000145999	2.73e-07	0.0779944
ID_58547	ZNF343	AT	8	NA	NA	0	1	0.6946	0.1213	ID_58547	ZNF343	0.00586629	0.118454	0.0259712	0.540264
ID_58546	ZNF343	AT	9	NA	NA	0	1	0.6946	0.1213	ID_58546	ZNF343	0.00586671	8.44197	1.85091	38.5036
ID_71416	FRG1	ES	2	1	3	0	1	0.3779	0.0659	ID_71416	FRG1	0.00587652	39.1948	2.88141	533.153
ID_13483	STK32C	AP	2	NA	NA	0	1	0.3648	0.0531	ID_13483	STK32C	0.00589403	43.0905	2.95846	627.621
ID_74095	RPS14	AD	1.2:1.3	1.1	3	0	1	0.0619	0.0066	ID_74095	RPS14	0.00591662	2094190000000000	25757.3	1.7e+26
ID_61039	DGCR14	AD	7.3	7.2	8	0	1	0.1032	0.0159	ID_61039	DGCR14	0.00591678	6.23407e+08	340.394	1141720000000000
ID_32758	SNRPA1	ES	6	5	7	0	1	0.3293	0.0682	ID_32758	SNRPA1	0.005921	96.2826	3.72337	2489.77
ID_53146	DPY30	AD	1.2	1.1	2	0	0.9976	0.1909	0.0266	ID_53146	DPY30	0.00592336	2535.28	9.54302	673543
ID_56461	DNAJC10	AT	12	NA	NA	0	1	0.6267	0.1235	ID_56461	DNAJC10	0.00593211	0.14181	0.0352735	0.570119
ID_56462	DNAJC10	AT	26	NA	NA	0	1	0.6267	0.1235	ID_56462	DNAJC10	0.00593364	7.05132	1.75392	28.3486
ID_83135	ADRA1A	AT	8	NA	NA	0	1	0.9104	0.297	ID_83135	ADRA1A	0.00593383	2.3745	1.28243	4.39653
ID_3328	WDR78	AT	3.2	NA	NA	0	0.886	0.5229	0.0957	ID_3328	WDR78	0.00594893	8.9226	1.87589	42.4401
ID_50598	AP2S1	AP	NA	NA	NA	0	1	0.2306	0.0242	ID_50598	AP2S1	0.00595834	0.000154707	2.98e-07	0.0803963
ID_49320	TYROBP	AD	1.2	1.1	2	0	0.9976	0.3506	0.0382	ID_49320	TYROBP	0.0059593	0.00312263	5.11e-05	0.190635
ID_7822	HAX1	ES	2.1:2.2:2.3	1	3.2	0	1	0.0193	0.002	ID_7822	HAX1	0.00595951	1.17e-42	1.53e-72	8.99e-13
ID_29701	SNRPN	ES	11	10.4	12	0	0.9905	0.112	0.0192	ID_29701	SNRPN	0.00596214	6.53e-07	2.55e-11	0.0167261
ID_38167	TUBB3	AP	4	NA	NA	0	1	0.8896	0.1836	ID_38167	TUBB3	0.00597164	3.76961	1.46374	9.70804
ID_81807	MEST	ES	11	10	12	0	0.9406	0.3016	0.0346	ID_81807	MEST	0.00597389	0.00296929	4.69e-05	0.188125
ID_80036	WBSCR27	ES	4	3	5	0	0.8812	0.56	0.0982	ID_80036	WBSCR27	0.00597533	0.109991	0.0227983	0.530653
ID_49337	WDR62	RI	25.6:25.7	25.5	25.8	0	0.9762	0.6282	0.1555	ID_49337	WDR62	0.00598345	0.217447	0.0732571	0.645441
ID_87057	ALG2	ES	2	1	3	0	0.9596	0.9266	0.1543	ID_87057	ALG2	0.00598757	4.61334	1.55059	13.7257
ID_80085	GTF2I	AT	11.2	NA	NA	0	1	0.0764	0.0039	ID_80085	GTF2I	0.00599373	6.93e+47	52570300000000	9.14e+81
ID_82827	FGL1	AP	6.1	NA	NA	0	0.9477	0.942	0.1248	ID_82827	FGL1	0.00599389	0.0594637	0.0079441	0.445101
ID_33410	IL32	ES	1.3:1.4:1.5:1.9	1.1	2.1	0	0.9834	0.4327	0.0326	ID_33410	IL32	0.00601253	0.00606343	0.000158767	0.231567
ID_89818	RBM41	ES	5	4	6.1	0	0.7625	0.9562	0.1757	ID_89818	RBM41	0.00602034	0.165771	0.0459796	0.597654
ID_80086	GTF2I	AT	35	NA	NA	0	1	0.0764	0.0039	ID_80086	GTF2I	0.00602632	1.37e-48	9.54e-83	1.97e-14
ID_13716	IRF7	AA	3.1	2.8	3.2	0	0.9549	0.3149	0.0552	ID_13716	IRF7	0.00605854	105.401	3.78701	2933.57
ID_21439	ASB8	ES	5.2	4.1	5.4	0	0.8599	0.2366	0.0481	ID_21439	ASB8	0.00606974	190.111	4.47887	8069.45
ID_13895	MRPL23	RI	5.2	5.1	5.3	0	0.9952	0.5229	0.078	ID_13895	MRPL23	0.00607694	0.0349495	0.00318353	0.383683
ID_2595	MUTYH	AP	NA	NA	NA	0	0.9287	0.7889	0.1363	ID_2595	MUTYH	0.00608257	0.118085	0.0256636	0.543338
ID_28425	FCF1	AD	1.2	1.1	2.1	0	0.7838	0.6423	0.088	ID_28425	FCF1	0.00609577	26.0177	2.53431	267.103
ID_80530	PON3	ES	5	4	6	0	0.9929	0.0689	0.0104	ID_80530	PON3	0.00609642	8.61e-10	2.86e-16	0.00259027
ID_203434	PKM	ME	12|13	11	14	0	1	0.2069	0.0306	ID_203434	PKM	0.00609724	0.00018351	3.92e-07	0.0858775
ID_64289	SEC22C	AT	11	NA	NA	0	1	0.315	0.0493	ID_64289	SEC22C	0.00610755	127.911	3.98912	4101.48
ID_64290	SEC22C	AT	12	NA	NA	0	1	0.315	0.0493	ID_64290	SEC22C	0.00611086	0.00782004	0.000243873	0.250758
ID_36603	KIFC3	AP	2	NA	NA	0	0.8717	0.6718	0.1019	ID_36603	KIFC3	0.00612545	9.22351	1.88339	45.1702
ID_62862	ODF3B	ES	3.1:3.2	2.2	4.2	0	0.9691	1	0.1499	ID_62862	ODF3B	0.00612951	0.242713	0.0881791	0.66807
ID_79157	AQP1	AP	NA	NA	NA	0	0.9359	1	0.2033	ID_79157	AQP1	0.00614051	2.84275	1.34646	6.00182
ID_72326	CDK7	ES	5.1:5.2:6:7:8	4	9	0	0.9857	0.0079	0.0004	ID_72326	CDK7	0.00615655	4.44e-155	1.62e-265	1.22e-44
ID_21790	LETMD1	ES	00:03:02.200000	1.2	5	0	0.9287	0.1606	0.0112	ID_21790	LETMD1	0.00617188	2.27e-07	3.99e-12	0.0129171
ID_83437	TACC1	AP	NA	NA	NA	0	0.7601	1	0.288	ID_83437	TACC1	0.00617489	0.315721	0.138334	0.720569
ID_26830	DCAF11	AP	2.1	NA	NA	0	0.9501	0.939	0.203	ID_26830	DCAF11	0.0061792	0.291799	0.120833	0.704661
ID_26831	DCAF11	AP	NA	NA	NA	0	0.9501	0.939	0.203	ID_26831	DCAF11	0.00617966	3.42697	1.4191	8.27574
ID_37194	PLA2G15	AA	6.1	5	6.2	0	0.9264	0.4242	0.0877	ID_37194	PLA2G15	0.0062013	22.9225	2.43309	215.956
ID_72006	MOCS2	AD	2.2	2.1	3	0	0.9644	0.2396	0.0316	ID_72006	MOCS2	0.00621674	653.318	6.28885	67870.1
ID_28122	DCAF5	AT	8	NA	NA	0	1	0.0899	0.0128	ID_28122	DCAF5	0.00622407	9.62542e+06	95.5629	969505000000
ID_28123	DCAF5	AT	11	NA	NA	0	1	0.0899	0.0128	ID_28123	DCAF5	0.00623422	1.04e-07	1.03e-12	0.0104958
ID_50103	RABAC1	ES	4	3	5	0	1	0.0152	0.0029	ID_50103	RABAC1	0.0062475	2.11e-36	5.65e-62	7.85e-11
ID_64649	CCDC51	AA	3.1	2.2	3.2	0	0.9667	0.3764	0.0428	ID_64649	CCDC51	0.00627951	382.157	5.37366	27177.7
ID_26314	MCF2L	AP	NA	NA	NA	0	0.8551	0.9748	0.1803	ID_26314	MCF2L	0.00629005	3.41178	1.41466	8.22831
ID_90586	TAZ	ES	7	6	8.1	0	0.9834	0.7869	0.1325	ID_90586	TAZ	0.00629241	0.135999	0.0325056	0.569002
ID_31520	PKM	ES	4	2.1	5.1	0	0.9192	0.0735	0.0059	ID_31520	PKM	0.00629342	43625820986	1016.09	1.87307e+18
ID_57239	RPE	ES	00:08:10.100000	7	10.2	0	0.8005	0.6508	0.1008	ID_57239	RPE	0.00632717	0.0802779	0.0131299	0.49083
ID_46797	MPND	AA	11.1	10	11.2	0	0.9976	0.0727	0.011	ID_46797	MPND	0.00634058	3525506468	492.038	2.52607e+16
ID_83390	PPAPDC1B	AD	1.4	1.3	2	0	0.9549	0.3745	0.0524	ID_83390	PPAPDC1B	0.00634372	77.6864	3.41141	1769.12
ID_35689	IL4R	ES	4	3.2	5	0	0.8385	0.4791	0.0715	ID_35689	IL4R	0.00634452	27.4692	2.54466	296.526
ID_33299	TCEB2	AP	2.1	NA	NA	0	1	0.0992	0.014	ID_33299	TCEB2	0.00635581	5.4894e+06	79.2354	380304000000
ID_33298	TCEB2	AP	NA	NA	NA	0	1	0.0992	0.014	ID_33298	TCEB2	0.00635958	1.82e-07	2.63e-12	0.0126353
ID_44264	STRA13	AD	3.2	3.1	4.1	0	1	0.4565	0.0653	ID_44264	STRA13	0.00636474	37.7906	2.78131	513.473
ID_41068	COASY	RI	1.2:1.3:1.4	1.1	1.5	0	0.9834	0.7776	0.1558	ID_41068	COASY	0.00637755	5.5747	1.62193	19.1607
ID_52484	MZF1	AP	NA	NA	NA	0	0.9169	0.8046	0.1162	ID_52484	MZF1	0.00639469	9.79966	1.90001	50.5435
ID_52485	MZF1	AP	2	NA	NA	0	0.9169	0.8046	0.1162	ID_52485	MZF1	0.00639469	0.102044	0.0197849	0.526312
ID_59354	BLCAP	AP	2.1	NA	NA	0	0.9644	0.1267	0.0173	ID_59354	BLCAP	0.00639817	596375	42.0696	8454170641
ID_80026	ABHD11	ES	4	3	5	0	1	0.2334	0.04	ID_80026	ABHD11	0.00641663	0.00543635	0.00012789	0.231089
ID_31614	CD276	AA	4.1	3	4.2	0	0.9264	0.0471	0.0067	ID_31614	CD276	0.00641664	1.06e-12	2.61e-21	0.000432745
ID_50961	FCGRT	ES	6	4	7	1	0.8076	0.0702	0.0113	ID_50961	FCGRT	0.00641758	1463976939	375.63	5705690000000000
ID_46552	KLF16	RI	2.2	2.1	2.3	0	1	0.0155	0.0009	ID_46552	KLF16	0.00644606	3.13e-120	3.29e-206	2.99e-34
ID_12337	TMEM254	ES	04:05:00	3	6	0	0.9477	1	0.1487	ID_12337	TMEM254	0.00646037	3.63507	1.43593	9.20219
ID_33329	PKMYT1	AA	9.1	8	9.2	0	1	0.1316	0.0195	ID_33329	PKMYT1	0.00646333	0.000120496	1.82e-07	0.0797083
ID_16636	PRDX5	ES	3	2	4	0	1	0.0424	0.0073	ID_16636	PRDX5	0.00648104	3.89e-14	8.63e-24	0.000175563
ID_1649	AK2	AT	6	NA	NA	0	1	0.0776	0.0058	ID_1649	AK2	0.00648623	3.47322e+18	155312	7.77e+31
ID_12889	POLL	ES	03:04:00	1.5	5.1	0	0.9667	0.608	0.0732	ID_12889	POLL	0.00650373	0.0768725	0.012113	0.487855
ID_53508	MSH6	ES	1.2:3:4	1.1	5.1	0	0.867	0.4044	0.0224	ID_53508	MSH6	0.0065058	0.00101071	7.03e-06	0.14525
ID_44088	BAIAP2	AT	18.2	NA	NA	0	1	0.3607	0.0536	ID_44088	BAIAP2	0.00653011	0.0161894	0.000829472	0.315981
ID_13486	STK32C	AP	NA	NA	NA	0	1	0.4893	0.0828	ID_13486	STK32C	0.00653327	0.0765574	0.0120155	0.487791
ID_1128	SRRM1	ES	16	15	17	0	0.8836	0.7112	0.1181	ID_1128	SRRM1	0.0065372	0.104932	0.0206671	0.532765
ID_87828	CRAT	ES	02:03:00	1	4.1	0	0.924	1	0.1334	ID_87828	CRAT	0.00654005	0.0844097	0.0142104	0.501393
ID_23723	PLXNC1	AT	31.2	NA	NA	0	1	0.6952	0.1034	ID_23723	PLXNC1	0.00654443	0.033628	0.00291579	0.387832
ID_23722	PLXNC1	AT	32	NA	NA	0	1	0.6952	0.1034	ID_23722	PLXNC1	0.00654443	29.7372	2.57843	342.96
ID_38571	ARRB2	ES	3	2	4.2	0	0.8361	0.4014	0.0771	ID_38571	ARRB2	0.00655409	0.0243502	0.00167223	0.354575
ID_32885	DECR2	AA	7.1	6	7.2	0	0.9762	0.8266	0.1167	ID_32885	DECR2	0.00656894	4.56903	1.52761	13.6659
ID_14714	HTATIP2	AD	1.2:1.3	1.1	1.5	0	0.9691	0.7232	0.0876	ID_14714	HTATIP2	0.0065695	11.1405	1.95863	63.3659
ID_29481	KLC1	ES	13.3:15:16	13.2	18	0	0.9216	0.8366	0.1535	ID_29481	KLC1	0.00658065	0.145178	0.0360912	0.583987
ID_81364	BCAP29	ES	3	1	4	0	0.981	0.1211	0.015	ID_81364	BCAP29	0.00658155	2.71e-07	4.96e-12	0.0147745
ID_51111	AKT1S1	AD	1.3	1.2	3.2	0	0.9976	0.6849	0.1015	ID_51111	AKT1S1	0.00659192	0.106057	0.0210153	0.535232
ID_32592	NR2F2	AP	4	NA	NA	0	1	0.4417	0.0617	ID_32592	NR2F2	0.0065987	0.0145105	0.000684393	0.307653
ID_18907	BACE1	AP	NA	NA	NA	0	0.9287	0.303	0.035	ID_18907	BACE1	0.00663782	0.00383573	6.91e-05	0.213011
ID_18908	BACE1	AP	3	NA	NA	0	0.9287	0.303	0.035	ID_18908	BACE1	0.00663782	260.707	4.6946	14477.9
ID_64990	NAT6	AA	3.2	1	3.3	0	0.9501	0.6433	0.1128	ID_64990	NAT6	0.00665603	0.123088	0.0271079	0.5589
ID_58603	CDC25B	ES	7	6	8	0	0.9715	0.4442	0.0308	ID_58603	CDC25B	0.00665662	0.00812513	0.000251262	0.262744
ID_38533	UBE2G1	ES	2	1	3	0	0.8504	0.0978	0.0141	ID_38533	UBE2G1	0.00666148	3.13983e+06	63.6582	154866000000
ID_44717	PTPN2	AT	12.2	NA	NA	0	1	0.3431	0.0593	ID_44717	PTPN2	0.00666353	0.0116499	0.00046717	0.290516
ID_44716	PTPN2	AT	13	NA	NA	0	1	0.3431	0.0593	ID_44716	PTPN2	0.00666614	85.8224	3.44145	2140.23
ID_75473	KDM1B	ES	1.2:2:3:4:5:6:7:8:9:10:11:12:13:14:15:16:17.2:18:19	1.1	20	0	0.8812	0.0121	0.0006	ID_75473	KDM1B	0.00668471	9e-101	4.53e-173	1.79e-28
ID_14166	ILK	AD	5.4:5.5	5.3	6	0	0.8029	0.4764	0.0729	ID_14166	ILK	0.00670043	0.0590855	0.00764585	0.4566
ID_88404	ZBED1	AP	NA	NA	NA	0	0.8931	0.7622	0.1158	ID_88404	ZBED1	0.00672391	0.121765	0.0265579	0.558278
ID_88405	ZBED1	AP	2	NA	NA	0	0.8931	0.7622	0.1158	ID_88405	ZBED1	0.0067252	8.21217	1.79114	37.6519
ID_25030	ARL6IP4	ES	2.2:3.1	2.1	3.2	0	1	0.4633	0.0976	ID_25030	ARL6IP4	0.00673166	12.4627	2.00993	77.2758
ID_56764	PPIL3	ES	4.1:4.2	3	6	1	0.8029	0.6538	0.1184	ID_56764	PPIL3	0.0067422	0.098503	0.0184202	0.52675
ID_101491	AFMID	ES	08:10:00	6	12	1	0.8361	0.1145	0.0097	ID_101491	AFMID	0.00674502	4.01792e+07	126.724	12739200000000
ID_37866	CRISPLD2	AT	15	NA	NA	0	0.9976	0.2039	0.0158	ID_37866	CRISPLD2	0.00675157	3.2e-05	1.79e-08	0.0571699
ID_20405	GABARAPL1	AD	2.7:2.8:2.9:2.10:2.11:2.12	2.6	3	0	0.9454	0.0846	0.0146	ID_20405	GABARAPL1	0.0067521	2.87e-10	3.59e-17	0.00230241
ID_32244	HOMER2	AA	5.1	4	5.2	0	0.9121	0.381	0.0567	ID_32244	HOMER2	0.00676135	96.9535	3.53958	2655.68
ID_82260	TMEM176B	ES	3	2.1	4.3	0	1	0.0449	0.0062	ID_82260	TMEM176B	0.00676795	125016000000000	7838.39	1.99e+24
ID_34757	NPIPB4	RI	9.8:9.9	9.7	9.1	0	0.9097	1	0.1547	ID_34757	NPIPB4	0.00676997	0.195342	0.0599084	0.636948
ID_17025	SLC29A2	AA	10.1	9	10.2	0	0.9572	0.3562	0.0558	ID_17025	SLC29A2	0.00677214	0.0183193	0.00101295	0.331308
ID_52472	SLC27A5	AP	NA	NA	NA	0	0.9905	1	0.2541	ID_52472	SLC27A5	0.00677705	0.424604	0.228398	0.789363
ID_52473	SLC27A5	AP	8.1	NA	NA	0	0.9905	1	0.2541	ID_52473	SLC27A5	0.00677802	2.3551	1.26683	4.37827
ID_44212	ANAPC11	AD	3.4	3.3	7.2	0	1	0.333	0.055	ID_44212	ANAPC11	0.00678699	82.6046	3.38132	2018
ID_14188	ZNF215	AT	8	NA	NA	0	0.9905	0.7932	0.1786	ID_14188	ZNF215	0.00681014	0.253108	0.0935658	0.684692
ID_14189	ZNF215	AT	7.2	NA	NA	0	0.9905	0.7932	0.1786	ID_14189	ZNF215	0.00681014	3.95088	1.46051	10.6877
ID_47908	NFIX	AD	5.3	5.2	6	0	0.9311	0.0907	0.0058	ID_47908	NFIX	0.00681747	1.01e-11	1.1e-19	0.000933476
ID_39440	CCDC144A	AT	28	NA	NA	0	1	0.5993	0.0625	ID_39440	CCDC144A	0.00682497	88.5097	3.43872	2278.16
ID_76581	ZNF451	AT	5	NA	NA	0	1	0.2287	0.0305	ID_76581	ZNF451	0.00683623	699.335	6.07148	80551.9
ID_46607	LSM7	AA	3.1	2	3.2	0	1	0.3419	0.0371	ID_46607	LSM7	0.00683655	0.00413638	7.75e-05	0.220667
ID_8072	FDPS	ES	00:02:03.100000	1.1	3.2	0	0.9952	0.5246	0.0746	ID_8072	FDPS	0.00684561	17.5146	2.19899	139.501
ID_58240	NDUFA10	AD	6.2	6.1	7	0	1	0.0193	0.0015	ID_58240	NDUFA10	0.00684729	1.81e-43	1.91e-74	1.73e-12
ID_86266	CCDC107	RI	3.4	3.3	3.5	0	1	0.4168	0.0589	ID_86266	CCDC107	0.0068486	48.5043	2.91015	808.437
ID_55028	IL1RN	AP	3	NA	NA	0	0.9074	0.6999	0.0595	ID_55028	IL1RN	0.00685153	51.6994	2.96124	902.603
ID_26455	TMEM55B	AD	1.2	1.1	2.1	0	0.9192	0.8847	0.1313	ID_26455	TMEM55B	0.00691712	7.31131	1.72583	30.9737
ID_1523	PTP4A2	ES	06:07:00	3	8	0	1	0.0309	0.0049	ID_1523	PTP4A2	0.00692172	2.24e-21	2.32e-36	2.17e-06
ID_42084	NPEPPS	ES	6.1:6.2	5	7.1	0	0.8314	0.4925	0.0764	ID_42084	NPEPPS	0.0069323	0.0119725	0.000482118	0.297313
ID_66873	ANAPC13	AD	2.2	2.1	3	0	0.9952	0.1746	0.0294	ID_66873	ANAPC13	0.00694178	1606.44	7.55724	341480
ID_10154	MRPL55	ES	2.2:2.5:2.6	1.1	2.9	0	0.9311	0.8674	0.148	ID_10154	MRPL55	0.00697575	0.150329	0.0379496	0.595499
ID_9850	SLC30A10	AA	3.1	2	3.2	0	0.8029	1	0.1692	ID_9850	SLC30A10	0.00699197	5.37728	1.58377	18.2571
ID_2555	RNF220	AP	7	NA	NA	0	0.9905	0.6767	0.0502	ID_2555	RNF220	0.00700914	0.0442634	0.00459073	0.426782
ID_78499	PDCD2	AT	3.3	NA	NA	0	1	0.4406	0.0884	ID_78499	PDCD2	0.00704288	14.0266	2.05476	95.751
ID_11548	NCOA4	ES	5	1	6	0	0.9382	0.2566	0.0321	ID_11548	NCOA4	0.00704579	119654	24.2386	590676376
ID_4413	PDE4DIP	AT	6.2	NA	NA	0	1	0.1126	0.0144	ID_4413	PDE4DIP	0.00707387	1.76834e+06	50.2546	62223850141
ID_73322	UQCRQ	RI	1.2:1.3	1.1	1.4	0	1	0.0406	0.0056	ID_73322	UQCRQ	0.00707564	1.80995e+16	26699.4	1.23e+28
ID_50364	APOC1	ES	4:5.1:5.2:5.3	3.2	7	0	0.9881	0.0261	0.0025	ID_50364	APOC1	0.00709525	9.74e+31	503040899	1.89e+55
ID_20817	LYRM5	AD	1.2	1.1	3.1	0	0.9525	0.2983	0.0519	ID_20817	LYRM5	0.00710676	0.00515469	0.000111276	0.238783
ID_16464	SLC3A2	AP	5.1	NA	NA	0	1	0.8008	0.107	ID_16464	SLC3A2	0.0071122	0.167288	0.0454986	0.615081
ID_36005	INO80E	ES	7:8:9:10	6.3	11	0	1	0.7508	0.1736	ID_36005	INO80E	0.00712151	0.22245	0.0744412	0.664737
ID_50248	ZNF283	AT	10	NA	NA	0	1	0.2907	0.0514	ID_50248	ZNF283	0.00712486	74.026	3.21967	1701.99
ID_12967	SFXN2	ES	10:11:00	9	12	0	0.9406	0.1824	0.0149	ID_12967	SFXN2	0.00715446	1.16e-06	5.45e-11	0.0245152
ID_18694	CRYAB	AP	NA	NA	NA	0	0.943	0.903	0.1452	ID_18694	CRYAB	0.00715624	4.04329	1.46075	11.1916
ID_63363	SEC13	ES	2.2	1.1	3	0	0.9834	0.0979	0.0128	ID_63363	SEC13	0.00715787	3.73955e+07	113.231	12350200000000
ID_39151	SLC25A35	AT	7.5	NA	NA	0	1	0.643	0.1114	ID_39151	SLC25A35	0.00716873	0.0928789	0.0164294	0.525063
ID_39149	SLC25A35	AT	5.3	NA	NA	0	1	0.643	0.1114	ID_39149	SLC25A35	0.00716891	10.7667	1.90453	60.867
ID_79590	RAMP3	AT	4	NA	NA	0	1	0.0464	0.0069	ID_79590	RAMP3	0.00718093	7.78e-21	1.7e-35	3.56e-06
ID_79589	RAMP3	AT	3.3	NA	NA	0	1	0.0464	0.0069	ID_79589	RAMP3	0.00718093	1.29e+20	280727	5.88e+34
ID_77608	ARG1	AA	3.1	2	3.2	0	0.9477	0.0902	0.0061	ID_77608	ARG1	0.00718227	23490800000000	4192.31	1.32e+23
ID_75922	FKBP5	ES	4:5:6:7	3.1	8	0	0.9549	0.0349	0.0053	ID_75922	FKBP5	0.00719907	3.07e+35	4041239344	2.33e+61
ID_50497	EML2	ES	22	21	23	0	0.9976	0.1399	0.0192	ID_50497	EML2	0.00720581	1.67e-05	5.49e-09	0.0509684
ID_39691	GRAPL	AT	4	NA	NA	0	0.829	0.8373	0.1612	ID_39691	GRAPL	0.00720707	6.75988	1.67721	27.2452
ID_39690	GRAPL	AT	3.2	NA	NA	0	0.829	0.8373	0.1612	ID_39690	GRAPL	0.00720707	0.147932	0.0367038	0.596227
ID_59304	NDRG3	ES	04:05:00	3	6	0	0.9121	0.4723	0.0415	ID_59304	NDRG3	0.00721548	0.0028646	4e-05	0.205177
ID_65789	ST3GAL6	AP	NA	NA	NA	0	0.8765	0.9196	0.1336	ID_65789	ST3GAL6	0.00724817	0.143703	0.0348735	0.592159
ID_51000	IRF3	ES	2	1.4	3	0	0.9976	0.0276	0.0051	ID_51000	IRF3	0.00725372	9.36e-18	3.48e-30	2.52e-05
ID_65492	FHIT	AA	10.1	9.1	10.2	0	0.9762	0.8327	0.1161	ID_65492	FHIT	0.00726231	0.142369	0.0343032	0.590872
ID_22383	MYL6	ES	2.1:2.2	1.4	3.1	0	1	0.0203	0.0029	ID_22383	MYL6	0.00728278	1.3e-32	6.73e-56	2.52e-09
ID_60164	ZGPAT	AD	2.2	2.1	3	0	0.9596	0.6256	0.0837	ID_60164	ZGPAT	0.00730632	0.0348956	0.00300654	0.405017
ID_26146	MBNL2	ES	5:6.1:6.2:6.3:7	4	8	0	0.7743	0.0519	0.0034	ID_26146	MBNL2	0.00731776	1.72e-20	6.17e-35	4.77e-06
ID_16286	TMEM258	ES	2.2:2.3:3.1	2.1	3.2	0	1	0.0856	0.0067	ID_16286	TMEM258	0.00731864	1.53836e+08	159.976	147932000000000
ID_71239	DCTD	ES	2.1:2.2:3:4	1.2	5	0	0.905	0.2864	0.03	ID_71239	DCTD	0.00733961	1091.47	6.5626	181530
ID_61930	FBXO7	AP	NA	NA	NA	0	0.9644	0.8023	0.1531	ID_61930	FBXO7	0.00735991	4.81375	1.5254	15.1909
ID_61931	FBXO7	AP	2	NA	NA	0	0.9644	0.8023	0.1531	ID_61931	FBXO7	0.00735994	0.207737	0.0658281	0.655567
ID_16667	RASGRP2	AT	6.2	NA	NA	0	0.8504	1	0.2104	ID_16667	RASGRP2	0.00737407	3.48325	1.39809	8.67829
ID_14869	DEPDC7	AP	NA	NA	NA	0	0.8836	0.1213	0.0125	ID_14869	DEPDC7	0.00737419	29833100000000	4151.91	2.14e+23
ID_14870	DEPDC7	AP	2	NA	NA	0	0.8836	0.1213	0.0125	ID_14870	DEPDC7	0.00737419	3.35e-14	4.67e-24	0.000240853
ID_16664	RASGRP2	AT	19	NA	NA	0	0.8504	1	0.2104	ID_16664	RASGRP2	0.00737545	0.287096	0.115233	0.715282
ID_20213	PHC1	AD	9.2	9.1	10	0	0.8717	0.1719	0.0328	ID_20213	PHC1	0.0073944	0.000786195	4.21e-06	0.146947
ID_1470	SERINC2	AP	2.1	NA	NA	0	0.9762	0.0341	0.0024	ID_1470	SERINC2	0.00740219	1.76e+25	5.89414e+06	5.27e+43
ID_38719	NLRP1	AT	17	NA	NA	0	1	0.5918	0.0989	ID_38719	NLRP1	0.00740281	0.06698	0.00926262	0.484347
ID_66222	GRAMD1C	AP	7	NA	NA	0	0.9121	0.5118	0.0874	ID_66222	GRAMD1C	0.00742167	11.4518	1.9218	68.2396
ID_79570	H2AFV	AT	5	NA	NA	0	1	0.5141	0.1136	ID_79570	H2AFV	0.00742432	8.24278	1.75962	38.6127
ID_29681	NIPA2	ES	5	4	6	0	0.9454	0.1303	0.0251	ID_29681	NIPA2	0.00744553	8.92e-05	9.64e-08	0.0824319
ID_75725	ZKSCAN4	AP	NA	NA	NA	0	0.9382	0.3238	0.0334	ID_75725	ZKSCAN4	0.00745979	306.757	4.62519	20345.1
ID_75726	ZKSCAN4	AP	2	NA	NA	0	0.9382	0.3238	0.0334	ID_75726	ZKSCAN4	0.00745979	0.00325991	4.92e-05	0.216207
ID_70089	EMCN	ES	06:07:08	5	9	0	0.9121	0.2498	0.0361	ID_70089	EMCN	0.00746834	0.00248002	3.06e-05	0.201086
ID_68074	MASP1	AT	10	NA	NA	0	0.9976	0.7888	0.1346	ID_68074	MASP1	0.00747725	3.97582	1.44609	10.9309
ID_47453	C19orf66	ES	4.1:4.3	3	5	0	0.9952	0.3534	0.0534	ID_47453	C19orf66	0.00751515	0.00314052	4.59e-05	0.2149
ID_90654	IKBKG	ES	7	6.2	8.1	0	0.9929	0.215	0.0277	ID_90654	IKBKG	0.00752597	0.00114066	7.93e-06	0.164166
ID_55744	TANK	ES	2.2:3	2.1	4	0	0.9216	0.952	0.2059	ID_55744	TANK	0.00752888	2.91691	1.33032	6.39574
ID_89313	AMER1	RI	2.2	2.1	2.3	0	0.9881	0.1891	0.0093	ID_89313	AMER1	0.00754716	5.24e-07	1.3e-11	0.02123
ID_52857	DNMT3A	AT	5.2	NA	NA	0	1	0.3811	0.0616	ID_52857	DNMT3A	0.00754805	0.00671555	0.000170998	0.263737
ID_52856	DNMT3A	AT	27	NA	NA	0	1	0.3811	0.0616	ID_52856	DNMT3A	0.00755031	148.871	3.79088	5846.29
ID_71316	ACSL1	AP	2	NA	NA	0	0.8907	0.8498	0.1668	ID_71316	ACSL1	0.0075507	0.187743	0.0550317	0.640491
ID_42769	GDPD1	AT	11	NA	NA	0	0.9952	0.8082	0.1071	ID_42769	GDPD1	0.00756309	10.2237	1.85676	56.2933
ID_3090	DIO1	AD	1.3:1.4:1.5	1.2	2.1	0	0.9287	0.2096	0.0186	ID_3090	DIO1	0.00756335	3.23e-05	1.63e-08	0.0637376
ID_76508	LRRC1	AT	16	NA	NA	0	1	0.8795	0.1281	ID_76508	LRRC1	0.0075837	13.8953	2.01347	95.8945
ID_13803	CHID1	AP	NA	NA	NA	0	0.9881	0.8096	0.2556	ID_13803	CHID1	0.00758773	0.33457	0.149766	0.747414
ID_17097	RBM4	AD	2.2	2.1	3.2	0	0.9834	0.2351	0.0356	ID_17097	RBM4	0.00764247	743.466	5.77509	95711.3
ID_29916	MEIS2	ES	5.1:5.2	4.2	6	0	0.791	0.2719	0.0497	ID_29916	MEIS2	0.00766655	0.0105188	0.000369827	0.29918
ID_17094	RBM4	AT	5	NA	NA	0	1	0.2578	0.0359	ID_17094	RBM4	0.00766821	853.371	5.9776	121828
ID_83190	PBK	ES	04:05:00	3	6	0	0.8124	0.3361	0.0288	ID_83190	PBK	0.00768585	0.00543491	0.000117463	0.251467
ID_48219	CPAMD8	AT	19.2	NA	NA	0	0.7957	0.555	0.0748	ID_48219	CPAMD8	0.00770802	16.4498	2.09703	129.038
ID_48218	CPAMD8	AT	42	NA	NA	0	0.7957	0.555	0.0748	ID_48218	CPAMD8	0.00770802	0.0607909	0.00774966	0.476864
ID_81748	STRIP2	AT	21	NA	NA	0	1	0.3985	0.0863	ID_81748	STRIP2	0.0077204	0.0584463	0.00723524	0.47213
ID_81747	STRIP2	AT	20.2	NA	NA	0	1	0.3985	0.0863	ID_81747	STRIP2	0.0077204	17.1097	2.11806	138.212
ID_42120	SCRN2	RI	7.2	7.1	7.3	0	1	0.796	0.1268	ID_42120	SCRN2	0.00773226	6.87296	1.66392	28.3893
ID_44205	ANAPC11	ES	8	7.2	9	0	1	0.0343	0.0048	ID_44205	ANAPC11	0.00773841	3.77514e+19	147852	9.64e+33
ID_26464	ANG	AP	NA	NA	NA	0	1	0.9793	0.2144	ID_26464	ANG	0.00775159	2.74442	1.30532	5.77014
ID_26463	ANG	AP	2	NA	NA	0	1	0.9793	0.2144	ID_26463	ANG	0.00775179	0.364374	0.173305	0.766099
ID_10169	MRPL55	ES	1.2:2.2:2.3:2.4	1.1	2.5	0	0.9976	0.701	0.0683	ID_10169	MRPL55	0.00776986	0.051894	0.00587568	0.458328
ID_86591	GDA	RI	15.3	15.2	15.4	0	0.9382	0.8687	0.0976	ID_86591	GDA	0.00778314	0.107166	0.0206888	0.555111
ID_40320	AP2B1	AA	6.1	5	6.2	0	0.8741	0.1726	0.0178	ID_40320	AP2B1	0.0077873	3.15e-05	1.52e-08	0.0651386
ID_8888	DCAF6	ES	3	2	4	0	0.9169	0.0874	0.0108	ID_8888	DCAF6	0.00779273	9.52e-09	1.18e-14	0.00770845
ID_58307	SNED1	AT	32	NA	NA	0	1	0.4475	0.0815	ID_58307	SNED1	0.00780129	0.0877294	0.0146078	0.526871
ID_58306	SNED1	AT	27.2	NA	NA	0	1	0.4475	0.0815	ID_58306	SNED1	0.00780145	11.3986	1.89798	68.4561
ID_29662	C14orf80	ES	08:09:00	7	10	0	0.7648	0.9543	0.24	ID_29662	C14orf80	0.00780167	0.315648	0.134982	0.738126
ID_42719	RAD51C	AD	1.2:1.3	1.1	2.1	0	0.9715	0.296	0.0399	ID_42719	RAD51C	0.00784972	399.633	4.82588	33093.7
ID_79986	TBL2	ES	2.3	1	4.3	0	0.8884	0.0246	0.0014	ID_79986	TBL2	0.00786141	7.24e+96	2.73e+25	1.92e+168
ID_86686	IDNK	ES	6	5	7	0	0.9905	0.027	0.0028	ID_86686	IDNK	0.00787457	1.69e-29	1.02e-50	2.81e-08
ID_15875	SERPING1	ES	2.2	1	3.2	0	1	0.0138	0.0019	ID_15875	SERPING1	0.00790189	5.17e-51	4.06e-88	6.58e-14
ID_79159	AQP1	AP	9.1	NA	NA	0	0.9359	0.1843	0.0217	ID_79159	AQP1	0.00790727	26737.8	14.4606	4.94385e+07
ID_54022	MTHFD2	ES	7	6	8	0	0.8266	0.0268	0.0014	ID_54022	MTHFD2	0.00791235	5.87e-45	1.34e-77	2.58e-12
ID_24418	ATP2A2	RI	21.2:21.3	21.1	21.4	0	1	0.23	0.0191	ID_24418	ATP2A2	0.00792022	44528700000000	3755.85	5.28e+23
ID_43507	UNK	AT	21	NA	NA	0	1	0.6879	0.1212	ID_43507	UNK	0.00792341	0.134845	0.0307284	0.591736
ID_23680	NUDT4	AA	5.1	4	5.2	0	0.8931	0.6517	0.0938	ID_23680	NUDT4	0.00793514	0.0598047	0.00747549	0.478444
ID_40635	RPL19	AD	1.2:1.3	1.1	2.1	0	1	0.0125	0.0015	ID_40635	RPL19	0.00794585	1.86e+56	525467000000000	6.59e+97
ID_49086	LSR	ES	5	3	6	0	0.9881	0.7569	0.1011	ID_49086	LSR	0.007954	15.0299	2.03135	111.205
ID_88773	DMD	ES	75:76:77:78	74	79	0	0.943	0.3032	0.0264	ID_88773	DMD	0.00796475	0.00049047	1.76e-06	0.136452
ID_36416	RBL2	ES	15.2:16:17:18:19:20:21:22.1	15.1	22.2	0	0.9929	0.1788	0.0157	ID_36416	RBL2	0.00797337	4.00713e+08	176.914	907620000000000
ID_16589	NUDT22	RI	1.3	1.2	1.4	0	0.9929	0.8914	0.1202	ID_16589	NUDT22	0.00799183	6.2256	1.61188	24.0453
ID_88068	CACFD1	ES	3	2	4	0	0.9929	0.3988	0.0576	ID_88068	CACFD1	0.00802395	0.0221332	0.00132286	0.370318
ID_60253	JAM2	AT	12	NA	NA	0	1	0.6836	0.1305	ID_60253	JAM2	0.00803342	0.178956	0.050143	0.638681
ID_60254	JAM2	AT	11	NA	NA	0	1	0.6836	0.1305	ID_60254	JAM2	0.0080337	5.58789	1.56571	19.9427
ID_32017	IDH3A	AA	4.1	2	4.2	0	0.8789	0.0786	0.0111	ID_32017	IDH3A	0.00804511	1.6e-08	2.74e-14	0.0093207
ID_79572	H2AFV	AT	6	NA	NA	0	1	0.5044	0.1123	ID_79572	H2AFV	0.00805429	0.121946	0.0257177	0.57823
ID_43231	RPL38	RI	1.3	1.2	1.4	0	1	0.0348	0.0034	ID_43231	RPL38	0.00807007	7.85e+23	1.64496e+06	3.75e+41
ID_82664	CTSB	ES	8	7	9	0	1	0.0631	0.0031	ID_82664	CTSB	0.0080933	2.23e-18	1.93e-31	2.59e-05
ID_65125	PCBP4	AA	15.1	14	15.2	0	1	0.3749	0.069	ID_65125	PCBP4	0.00813223	81.757	3.13436	2132.55
ID_55534	ORC4	AD	2.2	2.1	4	0	0.7601	0.5648	0.1005	ID_55534	ORC4	0.00814556	13.3403	1.95757	90.9107
ID_27560	FERMT2	ES	14	13	15	0	0.943	0.1521	0.0277	ID_27560	FERMT2	0.00815474	3643.13	8.3751	1.58475e+06
ID_81879	WDR91	AP	2	NA	NA	0	0.8646	0.2157	0.0225	ID_81879	WDR91	0.00816192	4152.62	8.65806	1.9917e+06
ID_81880	WDR91	AP	NA	NA	NA	0	0.8646	0.2157	0.0225	ID_81880	WDR91	0.00816192	0.000240812	5.02e-07	0.115499
ID_7297	RNF115	ES	3	2	4	0	0.8812	0.7458	0.1352	ID_7297	RNF115	0.00816944	0.0649067	0.00855426	0.492489
ID_17652	ATG16L2	RI	6.2	6.1	6.3	0	0.7957	0.9824	0.1741	ID_17652	ATG16L2	0.00820606	4.51763	1.47685	13.8192
ID_57395	FN1	ES	40.1:40.2	39	40.4	0	1	0.5305	0.0961	ID_57395	FN1	0.00821316	28.0703	2.36781	332.772
ID_13696	PHRF1	AA	16.1	15	16.2	0	1	0.0648	0.0079	ID_13696	PHRF1	0.00823301	5.09e+21	403467	6.42e+37
ID_45699	KIAA1468	ME	24|25	23	26	0	0.9002	1	0.1901	ID_45699	KIAA1468	0.00823777	3.74238	1.406	9.96117
ID_8968	PRRX1	AT	5	NA	NA	0	0.9644	0.5618	0.0705	ID_8968	PRRX1	0.00826866	0.0325532	0.00256273	0.413508
ID_8969	PRRX1	AT	3.2	NA	NA	0	0.9644	0.5618	0.0705	ID_8969	PRRX1	0.00826866	30.719	2.41833	390.209
ID_36379	BRD7	AA	14.1	13	14.2	0	0.9952	0.5268	0.0763	ID_36379	BRD7	0.00826907	0.0513731	0.00567403	0.465136
ID_83836	ATP6V1H	AD	1.2	1.1	2.1	0	0.8812	0.2124	0.0305	ID_83836	ATP6V1H	0.00826987	8.37e-06	1.43e-09	0.0490871
ID_33011	RPUSD1	ES	4	3.2	5.1	0	0.9834	0.3448	0.0321	ID_33011	RPUSD1	0.00827194	0.00232949	2.59e-05	0.209541
ID_48463	KXD1	ES	6	5	7.1	0	0.9952	0.1247	0.0181	ID_48463	KXD1	0.00831449	6.27e-07	1.55e-11	0.0253507
ID_101499	AFMID	ES	5:6:7:8:10:11.1:12	2	13	1	0.8005	0.8967	0.2302	ID_101499	AFMID	0.00833755	0.310803	0.130445	0.740531
ID_26471	RNASE1	ES	2.2:2.3	1	3.1	0	0.9952	0.2047	0.0295	ID_26471	RNASE1	0.00834226	988.374	5.88417	166019
ID_27356	GEMIN2	ES	5	4	6	0	0.962	0.9733	0.1574	ID_27356	GEMIN2	0.00834384	0.180749	0.0507069	0.644294
ID_43417	MIF4GD	ES	5	4	6.1	0	0.9976	0.2089	0.0379	ID_43417	MIF4GD	0.00836639	0.00319228	4.46e-05	0.228692
ID_77203	AK9	AT	12.2	NA	NA	0	0.9976	0.8897	0.1458	ID_77203	AK9	0.00837678	5.63306	1.55827	20.3632
ID_42614	MSI2	AP	3.1	NA	NA	0	0.9097	0.4658	0.095	ID_42614	MSI2	0.00838972	0.0471656	0.00486862	0.456926
ID_32832	NPRL3	AD	1.4	1.3	2	0	0.9026	0.1897	0.0142	ID_32832	NPRL3	0.00840163	3.59e-05	1.78e-08	0.0725671
ID_70290	LEF1	AT	13	NA	NA	0	0.9715	0.1861	0.0144	ID_70290	LEF1	0.00841234	4.81e-07	9.61e-12	0.0240653
ID_60877	SLC19A1	AP	4	NA	NA	0	0.753	1	0.3001	ID_60877	SLC19A1	0.00842475	0.385185	0.189422	0.783264
ID_78732	DAGLB	ES	04:05:00	3	6	0	0.9667	0.2322	0.023	ID_78732	DAGLB	0.00842533	3.59e-05	1.77e-08	0.0727661
ID_70288	LEF1	AT	6.2	NA	NA	0	0.9715	0.1861	0.0144	ID_70288	LEF1	0.00843357	2.07321e+06	41.3786	103875000000
ID_60878	SLC19A1	AP	2	NA	NA	0	0.753	1	0.2983	ID_60878	SLC19A1	0.00846368	2.60396	1.27715	5.30918
ID_33195	TSC2	AA	28.1	26	28.2	0	0.9192	0.8062	0.1026	ID_33195	TSC2	0.00846466	0.0740322	0.0106615	0.51407
ID_68073	MASP1	AT	13	NA	NA	0	0.9976	0.8915	0.1926	ID_68073	MASP1	0.0084781	3.24049	1.35032	7.77655
ID_1139	SYF2	ES	3	2	4	0	1	0.0519	0.0088	ID_1139	SYF2	0.00849813	8037180000000	1966.41	3.28e+22
ID_45175	INO80C	AA	4.1	3	4.2	0	1	0.4679	0.0669	ID_45175	INO80C	0.00850252	0.0453698	0.004532	0.454196
ID_47791	ZNF44	AT	6.2	NA	NA	0	1	0.6686	0.136	ID_47791	ZNF44	0.00851324	5.81366	1.56666	21.5737
ID_30957	ANXA2	ES	2	1.1	4.2	0	0.9952	0.455	0.0557	ID_30957	ANXA2	0.00852767	74.7	3.00254	1858.46
ID_44216	ANAPC11	ES	3.3:3.4:6	3.2	7.2	0	1	0.6517	0.1072	ID_44216	ANAPC11	0.0085338	9.22789	1.76168	48.3368
ID_57478	CTDSP1	AA	4.1	3	4.2	0	0.9667	0.6974	0.068	ID_57478	CTDSP1	0.00859575	0.0271009	0.00183731	0.399749
ID_8563	DEDD	ES	3.1:3.2	1	4	0	0.9382	0.3756	0.0592	ID_8563	DEDD	0.00860426	105.351	3.2644	3399.95
ID_10567	ZNF692	AA	3.1:3.2:3.3	2.3	3.4	0	0.8171	1	0.2457	ID_10567	ZNF692	0.00860776	0.350744	0.160527	0.766361
ID_21147	YAF2	ES	3.1:3.2:5.2:6:7	2	9.1	0	0.7601	0.1891	0.0198	ID_21147	YAF2	0.00862865	79738.2	17.5312	3.62678e+08
ID_47888	FARSA	AP	NA	NA	NA	0	0.9287	0.0473	0.0028	ID_47888	FARSA	0.00864455	1.99e+25	2.60203e+06	1.53e+44
ID_47887	FARSA	AP	2.1	NA	NA	0	0.9287	0.0473	0.0028	ID_47887	FARSA	0.00864455	5.02e-26	6.55e-45	3.84e-07
ID_10163	MRPL55	ES	2.2:2.5	1.1	2.9	0	0.7981	0.134	0.0229	ID_10163	MRPL55	0.00867242	1.72e-06	8.5e-11	0.0346638
ID_74025	ABLIM3	ES	4	3	5	0	0.772	0.2085	0.0219	ID_74025	ABLIM3	0.00869389	40466.2	14.6454	1.1181e+08
ID_46714	CACTIN	ES	10.3:10.5:10.6:10.7:10.8	10.2	10.9	0	0.8527	1	0.2109	ID_46714	CACTIN	0.00871602	0.264901	0.0981745	0.714774
ID_62666	FBLN1	AT	22	NA	NA	0	1	0.6672	0.1579	ID_62666	FBLN1	0.00872134	0.216362	0.0689245	0.679186
ID_152983	CD74	ES	9	4	10.2	1	0.9929	0.0089	0.0014	ID_152983	CD74	0.00875076	1.23e+70	4.89538e+17	3.08e+122
ID_8627	NR1I3	AA	6.6	6.4	6.7	0	0.8979	0.7328	0.0897	ID_8627	NR1I3	0.00878664	0.0474702	0.00485706	0.463947
ID_37080	ATP6V0D1	ES	3	1	4	0	0.962	0.0707	0.0061	ID_37080	ATP6V0D1	0.00879416	24609900000000	2362.34	2.56e+23
ID_84842	OXR1	AP	6.1	NA	NA	0	0.8907	0.9675	0.2057	ID_84842	OXR1	0.00880326	3.65426	1.38585	9.63566
ID_85602	VPS28	RI	3.12	3.11	3.13	0	1	0.198	0.0247	ID_85602	VPS28	0.00881269	4392.51	8.2582	2.33636e+06
ID_25949	INTS6	RI	1.2	1.1	1.3	0	0.8694	0.3973	0.047	ID_25949	INTS6	0.00883673	0.00529178	0.000104611	0.267686
ID_7529	CERS2	AA	4.1	3	4.2	0	0.9881	0.1268	0.0109	ID_7529	CERS2	0.00886044	89708757593	563.766	1.42748e+19
ID_69525	RCHY1	ES	2	1.2	3.1	0	0.905	0.119	0.0131	ID_69525	RCHY1	0.00886949	7.67e-07	2.02e-11	0.0291475
ID_66901	PCCB	AT	19.2	NA	NA	0	1	0.3323	0.0502	ID_66901	PCCB	0.00888035	81.9669	3.02164	2223.49
ID_66900	PCCB	AT	18.2	NA	NA	0	1	0.3323	0.0502	ID_66900	PCCB	0.00888124	0.0122005	0.000449754	0.330964
ID_7650	MRPL9	ES	5	4	6	0	1	0.1879	0.0332	ID_7650	MRPL9	0.00888735	0.00147335	1.11e-05	0.194797
ID_45429	KATNAL2	AT	20	NA	NA	0	0.981	0.8786	0.1487	ID_45429	KATNAL2	0.00890581	0.228789	0.0757612	0.690915
ID_45430	KATNAL2	AT	17	NA	NA	0	0.981	0.8786	0.1487	ID_45430	KATNAL2	0.00890581	4.37083	1.44736	13.1994
ID_88907	UBA1	AP	NA	NA	NA	0	1	0.3786	0.0558	ID_88907	UBA1	0.00890955	71.0392	2.91107	1733.58
ID_19225	TBRG1	ES	4	3	6	0	0.9572	0.7732	0.1439	ID_19225	TBRG1	0.00891476	0.200497	0.0601305	0.668533
ID_14940	CAPRIN1	AP	2.1	NA	NA	0	0.7791	0.9095	0.1465	ID_14940	CAPRIN1	0.0089191	6.50562	1.59865	26.4742
ID_62541	CYB5R3	AP	NA	NA	NA	0	0.9834	0.819	0.0902	ID_62541	CYB5R3	0.00894125	0.118718	0.0240253	0.586626
ID_2698	AKR1A1	ES	2	1	3	0	1	0.8865	0.0864	ID_2698	AKR1A1	0.0089629	6.11074	1.5724	23.7478
ID_26458	RNASE4	AP	2	NA	NA	0	1	0.9832	0.2231	ID_26458	RNASE4	0.00897555	0.379379	0.183375	0.784882
ID_26459	RNASE4	AP	NA	NA	NA	0	1	0.9832	0.2231	ID_26459	RNASE4	0.00897567	2.63589	1.27407	5.45329
ID_71319	ACSL1	AP	5	NA	NA	0	0.8907	0.84	0.1671	ID_71319	ACSL1	0.00900828	5.06815	1.49934	17.1316
ID_86280	TLN1	ES	43	42	44	0	0.9762	0.0038	0.0002	ID_86280	TLN1	0.00900969	6.36e-306	0	6.93e-77
ID_9961	WDR26	ES	7	6	8	0	0.9026	0.2359	0.025	ID_9961	WDR26	0.00902496	3.01e-06	2.16e-10	0.0419965
ID_90972	ECHDC2	ES	10	8.1	11	1	0.9454	0.4119	0.0791	ID_90972	ECHDC2	0.0090282	0.0491815	0.00512612	0.471862
ID_78590	PSMG3	AP	3.1	NA	NA	0	1	0.5414	0.0937	ID_78590	PSMG3	0.00903958	13.8661	1.92572	99.8426
ID_66576	ALDH1L1	AP	4	NA	NA	0	0.9691	0.1912	0.0196	ID_66576	ALDH1L1	0.00904235	6877.71	9.04136	5.23183e+06
ID_90614	UBL4A	RI	4.2	4.1	4.3	0	0.981	0.0326	0.0018	ID_90614	UBL4A	0.00904919	6.61e-30	8.13e-52	5.38e-08
ID_58863	ENTPD6	AA	14.1	13	14.2	0	0.9976	0.8012	0.0794	ID_58863	ENTPD6	0.00905209	0.0726892	0.0101514	0.520494
ID_25787	GPALPP1	AT	9.2	NA	NA	0	1	0.9068	0.1071	ID_25787	GPALPP1	0.00908166	8.18623	1.68708	39.722
ID_25788	GPALPP1	AT	11	NA	NA	0	1	0.9068	0.1071	ID_25788	GPALPP1	0.00908166	0.122156	0.025175	0.592738
ID_80143	POR	ES	6.1:6.2	5.1	7	0	1	0.0154	0.0019	ID_80143	POR	0.00910948	8.84e-44	3.89e-76	2.01e-11
ID_44222	ANAPC11	AD	3.3:3.4	3.2	6	0	1	0.4034	0.0733	ID_44222	ANAPC11	0.00914694	27.074	2.26645	323.414
ID_16577	TRPT1	ES	7.1:7.2	6	8	0	1	0.3483	0.0303	ID_16577	TRPT1	0.00916683	0.00843714	0.000232464	0.306221
ID_33346	TNFRSF12A	AP	NA	NA	NA	0	0.9834	0.0497	0.0037	ID_33346	TNFRSF12A	0.00917335	3.06e+21	210540	4.44e+37
ID_33345	TNFRSF12A	AP	2.1	NA	NA	0	0.9834	0.0497	0.0037	ID_33345	TNFRSF12A	0.00917335	3.27e-22	2.25e-38	4.75e-06
ID_20074	C1RL	AA	5.1	4.2	5.2	0	0.9929	0.6793	0.0702	ID_20074	C1RL	0.00918261	18.8155	2.0685	171.149
ID_65231	SMIM4	AD	1.2	1.1	2	0	1	0.3155	0.0556	ID_65231	SMIM4	0.00918487	0.0165408	0.000755566	0.362109
ID_86930	NUTM2F	AT	8	NA	NA	0	0.8005	1	0.2464	ID_86930	NUTM2F	0.00918866	2.79644	1.28997	6.0622
ID_86931	NUTM2F	AT	7	NA	NA	0	0.8005	1	0.2464	ID_86931	NUTM2F	0.00918866	0.357598	0.164957	0.775211
ID_58377	2019-09-02	ES	4	2	7	0	0.9074	0.327	0.0661	ID_58377	2019-09-02	0.00920677	32.8059	2.37168	453.782
ID_57936	COPS7B	AP	2	NA	NA	0	0.9477	0.9102	0.1786	ID_57936	COPS7B	0.00921988	4.28975	1.43344	12.8376
ID_57937	COPS7B	AP	NA	NA	NA	0	0.9477	0.9102	0.1786	ID_57937	COPS7B	0.00922092	0.23312	0.0778982	0.69764
ID_46608	TIMM13	AD	1.2	1.1	2	0	1	0.071	0.0126	ID_46608	TIMM13	0.00923894	2.22869e+08	115.472	430153000000000
ID_33357	HCFC1R1	RI	1.3:1.4	1.2	1.5	0	0.9976	0.3193	0.0582	ID_33357	HCFC1R1	0.009251	99.5343	3.11431	3181.15
ID_32290	ZSCAN2	AT	3	NA	NA	0	1	0.5384	0.0854	ID_32290	ZSCAN2	0.0092803	15.6449	1.9704	124.221
ID_15541	DGKZ	AP	2	NA	NA	0	0.8409	0.8633	0.1813	ID_15541	DGKZ	0.00928744	0.195795	0.0573063	0.66896
ID_19295	FEZ1	AT	11	NA	NA	0	0.9881	0.3743	0.0692	ID_19295	FEZ1	0.00928857	0.0374305	0.00314914	0.444896
ID_24727	RPLP0	AA	5.1:5.2	4.2	5.3	0	0.905	1	0.2045	ID_24727	RPLP0	0.00929008	0.279881	0.10722	0.730587
ID_19294	FEZ1	AT	3.2	NA	NA	0	0.9881	0.3743	0.0692	ID_19294	FEZ1	0.00929087	26.7134	2.24748	317.515
ID_82818	MTUS1	AP	12	NA	NA	0	0.7862	1	0.2747	ID_82818	MTUS1	0.00930301	0.363311	0.169392	0.779227
ID_4051	GSTM4	AT	6	NA	NA	0	1	0.3439	0.061	ID_4051	GSTM4	0.0093146	43.7813	2.53611	755.803
ID_4050	GSTM4	AT	5.3	NA	NA	0	1	0.3439	0.061	ID_4050	GSTM4	0.00931773	0.0228446	0.00132332	0.39437
ID_32877	NME4	AT	8.2	NA	NA	0	1	0.4131	0.0819	ID_32877	NME4	0.00935624	15.8247	1.97154	127.018
ID_32876	NME4	AT	14	NA	NA	0	1	0.4131	0.0819	ID_32876	NME4	0.00935772	0.0631966	0.00787347	0.507249
ID_39179	RPL26	AA	2.1	1.1	2.2	0	1	0.0093	0.0005	ID_39179	RPL26	0.00935845	1.55e+109	6.88e+26	3.51e+191
ID_82041	AGK	ES	14	13	15	0	0.9572	0.0208	0.0011	ID_82041	AGK	0.00936503	1.2e-48	8.63e-85	1.68e-12
ID_24600	OAS1	AT	7	NA	NA	0	1	0.3982	0.0335	ID_24600	OAS1	0.00936724	3.16e-05	1.27e-08	0.0784039
ID_53017	IFT172	AT	16.2	NA	NA	0	1	0.6747	0.1206	ID_53017	IFT172	0.00939352	0.131157	0.0283194	0.607431
ID_53018	IFT172	AT	49	NA	NA	0	1	0.6747	0.1206	ID_53018	IFT172	0.00939352	7.62447	1.64628	35.3115
ID_44458	TYMS	ES	02:03:00	1	4	0	0.9834	0.0333	0.0026	ID_44458	TYMS	0.00944225	1.84e-24	2.21e-42	1.54e-06
ID_85257	NDRG1	AD	1.2	1.1	2.1	0	0.9002	0.1536	0.0108	ID_85257	NDRG1	0.00946281	3.6745e+06	40.3967	334234000000
ID_68051	KNG1	AT	11	NA	NA	0	0.9976	0.393	0.065	ID_68051	KNG1	0.00948824	0.037343	0.00311445	0.447752
ID_68052	KNG1	AT	10.2	NA	NA	0	0.9976	0.393	0.065	ID_68052	KNG1	0.00949137	26.7755	2.23307	321.051
ID_25206	RAN	ES	1.3	1.1	2.1	0	1	0.1096	0.0151	ID_25206	RAN	0.00950883	7.96e-07	1.96e-11	0.0324132
ID_2779	PIK3R3	ES	10	9	11	0	0.8361	0.2507	0.0292	ID_2779	PIK3R3	0.00952865	0.00164423	1.29e-05	0.209289
ID_28338	COQ6	AP	2	NA	NA	0	0.9477	0.3207	0.0514	ID_28338	COQ6	0.00953359	0.0124068	0.000449088	0.342758
ID_49604	YIF1B	AP	2.1	NA	NA	0	0.9857	0.8302	0.1784	ID_49604	YIF1B	0.00955137	3.89239	1.39271	10.8786
ID_24603	OAS1	AA	6.1	5.1	6.2	0	1	0.8601	0.1746	ID_24603	OAS1	0.00957842	4.41011	1.43515	13.552
ID_25803	TPT1	AD	1.2	1.1	1.4	0	1	0.0012	0.0002	ID_25803	TPT1	0.00958668	Inf	7.24e+149	Inf
ID_21659	CERS5	ES	17.1:17.2	16	18	0	1	0.4613	0.0574	ID_21659	CERS5	0.00960579	0.0082247	0.000217382	0.311184
ID_83739	SMIM19	AD	2.3	2.2	3.2	0	0.981	0.6823	0.1099	ID_83739	SMIM19	0.00961686	8.7854	1.69585	45.5131
ID_45468	DYM	AT	23	NA	NA	0	1	0.0265	0.0033	ID_45468	DYM	0.00966903	6.51e-29	2.9e-50	1.46e-07
ID_42157	NFE2L1	AP	NA	NA	NA	0	0.9454	0.8803	0.1547	ID_42157	NFE2L1	0.00967028	4.64134	1.45097	14.8466
ID_72914	PPIP5K2	ES	29	28	30	0	0.8575	0.5627	0.0771	ID_72914	PPIP5K2	0.00967142	0.0713586	0.00965862	0.527203
ID_45466	DYM	AT	14	NA	NA	0	1	0.0265	0.0033	ID_45466	DYM	0.00967432	1.52e+28	6.80789e+06	3.41e+49
ID_87280	ALAD	ES	4	3	5	0	1	0.0158	0.0017	ID_87280	ALAD	0.00969034	1.34e-42	2.5e-74	7.15e-11
ID_31719	UBL7	AD	1.3:1.4	1.2	3	0	0.8527	0.6341	0.0931	ID_31719	UBL7	0.00969093	10.3965	1.76349	61.2919
ID_32314	SEC11A	ES	8	5	9	0	1	0.0218	0.0033	ID_32314	SEC11A	0.00969771	6.07e-29	2.52e-50	1.46e-07
ID_57616	FAM134A	ES	2	1	3	0	0.9786	0.0221	0.0015	ID_57616	FAM134A	0.00969861	4.92e-52	6.46e-91	3.74e-13
ID_1849	INPP5B	AT	24	NA	NA	0	1	0.2022	0.0288	ID_1849	INPP5B	0.00970006	6879.33	8.4997	5.56787e+06
ID_1848	INPP5B	AT	7.3	NA	NA	0	1	0.2022	0.0288	ID_1848	INPP5B	0.00970135	0.000145379	1.8e-07	0.117668
ID_68388	MYL5	ES	1.2:1.3:1.4:2	1.1	4.1	0	0.9881	0.6877	0.1192	ID_68388	MYL5	0.00970257	0.198466	0.05827	0.67597
ID_54826	FHL2	ES	7	5.1	8	0	0.9406	0.291	0.027	ID_54826	FHL2	0.00971593	0.00232596	2.35e-05	0.230494
ID_74844	HNRNPAB	ES	6	5.3	7	0	1	0.2498	0.0397	ID_74844	HNRNPAB	0.00972309	0.00227545	2.26e-05	0.229377
ID_9578	FAM72A	AT	6	NA	NA	0	1	0.9042	0.2226	ID_9578	FAM72A	0.00973998	4.07349	1.40434	11.8157
ID_94942	HNRNPM	ES	13	12	14	1	0.981	0.2417	0.0364	ID_94942	HNRNPM	0.00975738	0.00169988	1.35e-05	0.214236
ID_90310	CXorf40A	AD	1.3:1.4	1.2	1.6	0	0.9596	0.0199	0.0014	ID_90310	CXorf40A	0.00979043	7.73e-42	4.94e-73	1.21e-10
ID_39855	LGALS9	ES	10	9	11	0	1	0.1703	0.0285	ID_39855	LGALS9	0.00979948	0.000366767	9.06e-07	0.148417
ID_42595	DGKE	AT	2.2	NA	NA	0	1	0.3904	0.0701	ID_42595	DGKE	0.00980327	27.6663	2.22678	343.735
ID_42596	DGKE	AT	12	NA	NA	0	1	0.3904	0.0701	ID_42596	DGKE	0.00980327	0.0361451	0.00290922	0.449079
ID_66014	CD47	ES	08:09:10	7	11	1	0.9074	0.8507	0.147	ID_66014	CD47	0.00980483	0.195321	0.0565584	0.674527
ID_89029	PQBP1	AD	1.2:1.3	1.1	2.3	0	0.9929	0.9671	0.2054	ID_89029	PQBP1	0.00982574	0.287827	0.111828	0.740822
ID_68856	QDPR	ES	6	5	7	0	1	0.2531	0.0272	ID_68856	QDPR	0.00983436	0.00194298	1.7e-05	0.222371
ID_68961	ZCCHC4	AT	12.2	NA	NA	0	1	0.6032	0.0766	ID_68961	ZCCHC4	0.00983824	15.4404	1.93275	123.35
ID_68960	ZCCHC4	AT	13	NA	NA	0	1	0.6032	0.0766	ID_68960	ZCCHC4	0.00984319	0.0647761	0.00810824	0.517491
ID_10250	C1orf198	AP	5	NA	NA	0	0.8789	0.5762	0.0955	ID_10250	C1orf198	0.00985328	8.05995	1.6522	39.3189
ID_10796	SEPHS1	ES	2	1	3	0	0.9976	0.1197	0.0194	ID_10796	SEPHS1	0.00985685	7.58535e+06	45.1924	1273170000000
ID_36483	MT1A	ES	2	1	3	1	0.7981	0.3969	0.0617	ID_36483	MT1A	0.00986045	0.0181349	0.000862787	0.381178
ID_16916	RNASEH2C	RI	1.2	1.1	1.3	0	1	0.6151	0.0871	ID_16916	RNASEH2C	0.00986981	10.3093	1.75231	60.6526
ID_40481	MYO19	ES	23	22	24	0	0.9145	0.64	0.1047	ID_40481	MYO19	0.00987348	0.0559909	0.0062687	0.500101
ID_80092	GTF2IRD2	AT	3.2	NA	NA	0	1	0.6628	0.1317	ID_80092	GTF2IRD2	0.00989483	5.52449	1.50757	20.2445
ID_54760	MAP4K4	ES	17:18:00	16.2	19	0	0.8646	0.3051	0.0463	ID_54760	MAP4K4	0.00989867	64.6107	2.7209	1534.25
ID_88075	SARDH	AP	NA	NA	NA	0	0.924	1	0.2246	ID_88075	SARDH	0.00990424	0.336931	0.147403	0.770148
ID_16587	NUDT22	ES	3	1.4	4	0	0.9382	0.3932	0.0567	ID_16587	NUDT22	0.00991705	0.0309277	0.00220255	0.434279
ID_58274	CAPN10	ES	8:9:10.1:10.2	7	11	0	0.9762	0.4791	0.0829	ID_58274	CAPN10	0.00992621	0.109196	0.0202814	0.587915
ID_35791	SULT1A2	ES	1.4:2.1:2.3	1.1	5.2	1	0.7577	0.9183	0.2231	ID_35791	SULT1A2	0.00993817	0.324217	0.137701	0.763368
ID_56161	PRKRA	ES	4	3.1	5	0	0.943	0.6667	0.0851	ID_56161	PRKRA	0.00997117	0.0212906	0.00113917	0.397912
ID_16972	EIF1AD	ES	1.2:2.1:2.2:2.3	1.1	2.4	0	0.8789	0.7991	0.1841	ID_16972	EIF1AD	0.00998773	4.35462	1.42184	13.3368
ID_66824	UBA5	AD	2.2	2.1	3	0	0.8599	0.5249	0.0383	ID_66824	UBA5	0.0100002	73.9212	2.79775	1953.12
ID_55743	TANK	ES	3	2.2	4	0	0.9406	0.9842	0.1532	ID_55743	TANK	0.0100245	3.0219	1.3023	7.01212
ID_18484	DCUN1D5	ES	2	1.1	3	0	0.9786	0.1069	0.0127	ID_18484	DCUN1D5	0.0100304	3.68e-07	4.66e-12	0.0290881
ID_44912	SS18	ES	15	14	16	0	0.9264	0.863	0.1467	ID_44912	SS18	0.0100569	0.176813	0.0472615	0.661487
ID_7278	POLR3GL	ES	4	3	5	0	1	0.517	0.0414	ID_7278	POLR3GL	0.0100609	0.0508383	0.00525922	0.491429
ID_61390	CABIN1	AD	27.2	27.1	28	0	0.9121	0.4334	0.0633	ID_61390	CABIN1	0.0100737	125.469	3.16352	4976.22
ID_80543	DYNC1I1	AT	6	NA	NA	0	0.8717	0.5805	0.1107	ID_80543	DYNC1I1	0.0100765	8.84396	1.68112	46.5258
ID_16407	BSCL2	ES	10	9	11	0	1	0.0656	0.0093	ID_16407	BSCL2	0.010095	1.4e-10	4.35e-18	0.00450353
ID_80552	SHFM1	AT	4.2	NA	NA	0	1	0.0115	0.0017	ID_80552	SHFM1	0.0101096	3.41e+50	1061160000000	1.1e+89
ID_68077	MASP1	ES	3	1	4	0	0.9406	0.5306	0.0738	ID_68077	MASP1	0.01011	44.0672	2.46182	788.815
ID_9561	ELK4	AT	5	NA	NA	0	1	0.4826	0.087	ID_9561	ELK4	0.0101306	0.0848193	0.0129347	0.556202
ID_9560	ELK4	AT	3.2	NA	NA	0	1	0.4826	0.087	ID_9560	ELK4	0.0101313	11.7895	1.79787	77.3102
ID_34280	TMC7	AT	17	NA	NA	0	1	0.592	0.1126	ID_34280	TMC7	0.0101358	8.36447	1.65682	42.2281
ID_34279	TMC7	AT	16.2	NA	NA	0	1	0.592	0.1126	ID_34279	TMC7	0.0101359	0.119553	0.0236807	0.603566
ID_58198	SCLY	AT	13	NA	NA	0	1	0.5065	0.0707	ID_58198	SCLY	0.010189	0.0755424	0.0105304	0.541921
ID_58199	SCLY	AT	9.2	NA	NA	0	1	0.5065	0.0707	ID_58199	SCLY	0.0101898	13.2373	1.84524	94.9613
ID_25666	SUPT20H	ES	14	13	15	0	0.8646	0.1852	0.0288	ID_25666	SUPT20H	0.0101903	2.44189e+06	32.7282	182193000000
ID_30105	MAPKBP1	ES	29.2:30	29.1	31	0	0.9929	0.0954	0.0047	ID_30105	MAPKBP1	0.0101953	1.15e-12	8.97e-22	0.00147612
ID_35531	C16orf52	AT	4.2	NA	NA	0	1	0.4186	0.0428	ID_35531	C16orf52	0.0102128	109.326	3.0412	3930.08
ID_12835	NDUFB8	AD	1.2	1.1	2.1	0	1	0.0862	0.0103	ID_12835	NDUFB8	0.0102242	4.36e-08	1.05e-13	0.0180699
ID_13745	PDDC1	ES	7:8.1:8.2	6.2	8.3	0	1	0.9649	0.0976	ID_13745	PDDC1	0.0102988	0.240298	0.0808513	0.71419
ID_42770	GDPD1	AT	10	NA	NA	0	0.9952	0.8082	0.1054	ID_42770	GDPD1	0.0103159	0.101191	0.0175781	0.582525
ID_60186	TCEA2	AP	NA	NA	NA	0	1	0.8937	0.1412	ID_60186	TCEA2	0.0103243	4.36955	1.41587	13.485
ID_60187	TCEA2	AP	3	NA	NA	0	1	0.8937	0.1412	ID_60187	TCEA2	0.0103243	0.228856	0.0741567	0.706278
ID_33906	ABAT	ES	8	7	9	0	0.8765	0.1381	0.017	ID_33906	ABAT	0.0103276	65915.3	13.6843	3.17503e+08
ID_48476	UBA52	AD	1.4:1.5	1.3	4.2	0	1	0.0148	0.0025	ID_48476	UBA52	0.0103566	2.83e+36	3.83782e+08	2.09e+64
ID_17184	PPP1CA	ES	2.2	1	3	0	1	0.1339	0.0215	ID_17184	PPP1CA	0.0103732	4.52e-05	2.15e-08	0.0949503
ID_47658	TMEM205	AA	2.5	2.3	2.6	0	0.9667	0.6256	0.1164	ID_47658	TMEM205	0.0103749	7.83284	1.6231	37.8
ID_44229	PCYT2	ES	12	11	13	0	1	0.0686	0.01	ID_44229	PCYT2	0.0103985	6.34e-09	3.4e-15	0.0118261
ID_81054	FIS1	ES	3	2.1	4	0	1	0.1002	0.0184	ID_81054	FIS1	0.0104085	6.07e-06	6.2e-10	0.0594626
ID_44172	FAM195B	RI	4.4	4.3	4.5	0	1	0.4662	0.081	ID_44172	FAM195B	0.0104086	22.5734	2.07997	244.984
ID_15688	ACP2	ES	5.3:6.3	5.1	8	0	0.9952	0.0135	0.001	ID_15688	ACP2	0.0104109	7.36e-67	1.87e-117	2.9e-16
ID_87113	SLC44A1	AT	16.4	NA	NA	0	1	0.8759	0.2018	ID_87113	SLC44A1	0.0104188	3.12986	1.30733	7.49317
ID_63115	MTMR14	ES	19	18	21	0	1	0.6304	0.0967	ID_63115	MTMR14	0.0104189	0.0866172	0.013327	0.562958
ID_87112	SLC44A1	AT	17	NA	NA	0	1	0.8759	0.2018	ID_87112	SLC44A1	0.0104191	0.319505	0.133456	0.764923
ID_27377	CTAGE5	ES	21	20	22	0	0.9952	0.6065	0.0692	ID_27377	CTAGE5	0.0104512	0.0828377	0.0123079	0.557536
ID_90035	STAG2	ES	7	6	8	0	0.9311	0.3305	0.0481	ID_90035	STAG2	0.0104587	0.00206459	1.82e-05	0.234639
ID_51100	PTOV1	AA	9.1	8	9.2	0	1	0.0519	0.0083	ID_51100	PTOV1	0.0104631	1.8e-11	1.07e-19	0.00302793
ID_8223	C1orf85	ES	5.1:5.2	4	6.1	1	0.9002	0.8432	0.1508	ID_8223	C1orf85	0.0104811	0.216187	0.0669078	0.698526
ID_22695	OS9	RI	7.2	7.1	7.3	0	0.9739	0.4447	0.049	ID_22695	OS9	0.010494	43.1826	2.4147	772.244
ID_157222	SAA1	ES	02:03:00	1.1	4	1	0.905	0.1235	0.0197	ID_157222	SAA1	0.0105052	7.47e-06	8.83e-10	0.0631351
ID_40845	MSL1	RI	1.2	1.1	1.3	0	0.9739	0.7443	0.1173	ID_40845	MSL1	0.0105303	9.32471	1.68525	51.5947
ID_7774	CREB3L4	AD	3.2	3.1	4	0	0.9335	0.7161	0.1201	ID_7774	CREB3L4	0.0105306	9.26667	1.68279	51.0291
ID_48533	HOMER3	AP	4.1	NA	NA	0	0.9691	0.9593	0.1978	ID_48533	HOMER3	0.0105352	0.283296	0.10777	0.744697
ID_50310	ZNF233	AT	6	NA	NA	0	0.9691	0.7961	0.1692	ID_50310	ZNF233	0.0105705	0.225052	0.0717333	0.706064
ID_50311	ZNF233	AT	7.2	NA	NA	0	0.9691	0.7961	0.1692	ID_50311	ZNF233	0.0105712	4.44335	1.41628	13.9403
ID_61140	RANBP1	RI	7.2	7.1	7.3	0	1	0.1957	0.0298	ID_61140	RANBP1	0.0105854	0.00018906	2.64e-07	0.135403
ID_58470	FAM110A	ES	3	1	4.2	0	0.8646	1	0.2477	ID_58470	FAM110A	0.0105902	0.358605	0.163336	0.787315
ID_75020	MGAT1	AP	3	NA	NA	0	0.9834	0.3816	0.0782	ID_75020	MGAT1	0.0106035	21.3136	2.04	222.68
ID_50101	ARHGEF1	ES	15	14	16	0	0.9644	0.616	0.124	ID_50101	ARHGEF1	0.0106097	0.119224	0.02333	0.609271
ID_3230	TM2D1	AT	5	NA	NA	0	1	0.26	0.0459	ID_3230	TM2D1	0.0106174	0.00389344	5.52e-05	0.274649
ID_3232	TM2D1	AT	8	NA	NA	0	1	0.26	0.0459	ID_3232	TM2D1	0.0106184	256.828	3.64076	18117.2
ID_49849	FBL	ES	4	3	5	0	1	0.0087	0.0006	ID_49849	FBL	0.0106238	1.34e-146	1.65e-258	1.08e-34
ID_32943	RHOT2	ES	00:03:04.100000	2.2	4.2	0	0.9715	0.1208	0.007	ID_32943	RHOT2	0.0106262	1.76e-09	3.37e-16	0.00915404
ID_9261	TROVE2	ES	3.2	1	4	0	0.8029	0.7262	0.1652	ID_9261	TROVE2	0.0106402	5.19802	1.46744	18.4126
ID_78806	TMEM106B	ES	2	1	3	0	0.8599	1	0.1248	ID_78806	TMEM106B	0.0106586	4.22094	1.39768	12.7471
ID_81754	NRF1	ES	4	3.2	5	0	0.829	0.2479	0.0268	ID_81754	NRF1	0.0106672	0.00109605	5.86e-06	0.205123
ID_32945	RHOT2	ES	3	2.2	4.1	0	0.9715	0.0564	0.0078	ID_32945	RHOT2	0.0107067	2.57e-12	3.24e-21	0.00204631
ID_88074	SARDH	AP	2	NA	NA	0	0.924	0.9918	0.2235	ID_88074	SARDH	0.0107319	2.9439	1.28436	6.74773
ID_63260	IL17RC	ES	12	11	13	0	1	0.2658	0.0384	ID_63260	IL17RC	0.0107357	0.00531313	9.5e-05	0.297073
ID_46953	NDUFA11	AT	5	NA	NA	0	1	0.0095	0.0014	ID_46953	NDUFA11	0.0107391	1.72e+60	90673200000000	3.28e+106
ID_30640	GNB5	AT	5.2	NA	NA	0	1	0.1127	0.016	ID_30640	GNB5	0.0107543	53558.9	12.4457	2.30486e+08
ID_29992	C15orf57	AT	3.2	NA	NA	0	1	0.4239	0.0714	ID_29992	C15orf57	0.0107586	0.0480512	0.00466252	0.495208
ID_65446	PXK	ES	05:06:07	4	8	0	0.8599	0.0486	0.0031	ID_65446	PXK	0.0107711	1.13e-19	3.1e-34	4.13e-05
ID_30638	GNB5	AT	13	NA	NA	0	1	0.1127	0.016	ID_30638	GNB5	0.0107752	1.87e-05	4.35e-09	0.0805686
ID_89999	LAMP2	AT	10	NA	NA	0	1	0.6347	0.105	ID_89999	LAMP2	0.0107832	8.57189	1.64362	44.7045
ID_16544	MARK2	ES	16.1:16.2	15.2	17	0	0.9406	0.7523	0.14	ID_16544	MARK2	0.0107871	0.200023	0.0580469	0.689255
ID_46952	NDUFA11	AT	4.3	NA	NA	0	1	0.0095	0.0014	ID_46952	NDUFA11	0.0107935	6.29e-61	3.27e-107	1.21e-14
ID_59288	MYL9	ES	3	2	4	0	1	0.2103	0.0254	ID_59288	MYL9	0.010809	0.000422441	1.07e-06	0.166133
ID_46712	CACTIN	RI	10.4	10.3	10.5	0	0.9976	0.354	0.0486	ID_46712	CACTIN	0.010811	263.773	3.62515	19192.6
ID_217	CDK11A	AA	6.1	5	6.2	0	0.9691	0.1867	0.0163	ID_217	CDK11A	0.0108247	5573.92	7.32654	4.24055e+06
ID_84309	ZFAND1	ES	3	2	4	0	0.9549	0.8791	0.1706	ID_84309	ZFAND1	0.0108479	0.241705	0.0810616	0.7207
ID_21323	SLC38A1	AT	19	NA	NA	0	1	0.9104	0.1832	ID_21323	SLC38A1	0.0108521	0.226117	0.0720385	0.709746
ID_21322	SLC38A1	AT	20	NA	NA	0	1	0.9104	0.1832	ID_21322	SLC38A1	0.0108538	4.42227	1.4089	13.8806
ID_12341	PLAC9	ES	4	3	5	0	0.9905	0.1652	0.0165	ID_12341	PLAC9	0.0108586	5.11e-07	7.38e-12	0.0354458
ID_59461	HNF4A	AP	2	NA	NA	0	0.9644	1	0.164	ID_59461	HNF4A	0.0108644	0.341069	0.149059	0.780413
ID_59462	HNF4A	AP	NA	NA	NA	0	0.9644	1	0.164	ID_59462	HNF4A	0.010865	2.93195	1.28136	6.70872
ID_83727	SLC20A2	AP	3	NA	NA	0	0.943	1	0.2135	ID_83727	SLC20A2	0.0108707	3.13241	1.30096	7.54209
ID_74656	RNF44	AP	NA	NA	NA	0	0.8504	0.8856	0.1612	ID_74656	RNF44	0.0108799	0.161697	0.0397808	0.657253
ID_74655	RNF44	AP	2	NA	NA	0	0.8504	0.8856	0.1612	ID_74655	RNF44	0.0108817	6.184	1.52141	25.1357
ID_48820	ZNF675	AT	6	NA	NA	0	1	0.5586	0.1075	ID_48820	ZNF675	0.0108936	8.59523	1.64087	45.0237
ID_32247	C15orf40	AT	6	NA	NA	0	1	0.154	0.028	ID_32247	C15orf40	0.0108943	8.04e-06	9.63e-10	0.0671792
ID_44111	ENTHD2	ES	8	7	9	0	0.9715	0.3616	0.0679	ID_44111	ENTHD2	0.0109004	0.0357685	0.0027536	0.464622
ID_42963	STRADA	RI	12.3:12.4	12.2	12.5	0	0.9596	0.811	0.1685	ID_42963	STRADA	0.0109007	4.3464	1.40236	13.471
ID_24584	RPL6	AD	1.2	1.1	2	0	1	0.4813	0.0813	ID_24584	RPL6	0.0109023	13.0063	1.80465	93.7376
ID_49090	LSR	ES	3	2.2	6	0	0.9667	0.3714	0.0228	ID_49090	LSR	0.0109047	0.00304902	3.53e-05	0.263697
ID_60413	IFNGR2	ES	2.2:3	1	4	0	0.8812	0.0529	0.0098	ID_60413	IFNGR2	0.0109317	7647441249	186.903	3.12908e+17
ID_91867	PSTK	AD	4.4:4.5	4.3	5	1	0.8955	0.4055	0.0695	ID_91867	PSTK	0.0109495	0.0150993	0.000597239	0.38174
ID_1560	CCDC28B	AT	3	NA	NA	0	0.981	0.4515	0.0649	ID_1560	CCDC28B	0.0109566	0.00607824	0.000119233	0.309856
ID_1561	CCDC28B	AT	6.3	NA	NA	0	0.981	0.4515	0.0649	ID_1561	CCDC28B	0.0109566	164.521	3.22731	8386.94
ID_29436	TNFAIP2	ES	10	9.2	11	0	0.9549	0.0901	0.0055	ID_29436	TNFAIP2	0.0109995	1.7e-11	8.46e-20	0.00340066
ID_7267	NBPF10	ES	5:6:7:8:9	4.2	10	0	0.9382	0.6079	0.0854	ID_7267	NBPF10	0.0110007	0.119545	0.0232525	0.614603
ID_86608	ANXA1	AP	2.1	NA	NA	0	0.8812	0.0623	0.0079	ID_86608	ANXA1	0.0110147	313072000000	429.479	2.28e+20
ID_86607	ANXA1	AP	NA	NA	NA	0	0.8812	0.0623	0.0079	ID_86607	ANXA1	0.0110147	3.19e-12	4.38e-21	0.0023284
ID_19086	HYOU1	AA	18.1	17	18.2	0	0.962	0.1472	0.0157	ID_19086	HYOU1	0.0110239	480792	19.9932	11561969938
ID_10151	MRPL55	ES	2.2:2.4:2.5:2.6	1.1	2.9	0	0.791	0.1629	0.0198	ID_10151	MRPL55	0.0110373	4.21e-09	1.46e-15	0.0121176
ID_302227	NDUFA13	ES	4.3:6:7	4.1	8	1	1	0.1005	0.0163	ID_302227	NDUFA13	0.0110419	172402	15.776	1884020560
ID_58542	SNRPB	AA	8.1	7.1	8.2	0	1	0.5179	0.0661	ID_58542	SNRPB	0.0110501	0.07821	0.0109555	0.55833
ID_55705	CD302	ES	4	3	5	0	0.9976	0.1824	0.0127	ID_55705	CD302	0.0110932	2.87e-06	1.51e-10	0.0542923
ID_36016	INO80E	ES	6.2:6.3	5	11	0	1	0.6748	0.0993	ID_36016	INO80E	0.0111359	0.176672	0.0463327	0.673671
ID_78981	CCDC126	AP	3	NA	NA	0	0.9145	0.0472	0.0024	ID_78981	CCDC126	0.0111436	7.57e+23	275259	2.08e+42
ID_78980	CCDC126	AP	NA	NA	NA	0	0.9145	0.0472	0.0024	ID_78980	CCDC126	0.0111436	1.32e-24	4.8e-43	3.63e-06
ID_85963	PLIN2	AD	5.2	5.1	6.1	0	1	0.032	0.0025	ID_85963	PLIN2	0.0111932	3.12e-26	6.13e-46	1.59e-06
ID_13999	PGAP2	AP	3	NA	NA	0	0.943	0.2144	0.0207	ID_13999	PGAP2	0.0111997	4552.65	6.78273	3.0558e+06
ID_162	CCNL2	ES	6.1	5	7.2	0	0.7815	0.5457	0.0755	ID_162	CCNL2	0.0112204	19.4266	1.96135	192.415
ID_28620	SNW1	RI	13.2	13.1	13.3	0	0.9952	0.2723	0.0323	ID_28620	SNW1	0.0112408	0.000149694	1.65e-07	0.135595
ID_73299	2019-09-08	AT	12.3	NA	NA	0	1	0.6892	0.0801	ID_73299	2019-09-08	0.0112575	29.6495	2.15641	407.664
ID_86199	GALT	AA	6.1	5	6.2	0	1	0.2112	0.0309	ID_86199	GALT	0.0112807	1279.98	5.0556	324065
ID_32925	FAM195A	ES	03:04:00	2	5	0	1	0.21	0.0182	ID_32925	FAM195A	0.0112974	0.000106558	9e-08	0.12615
ID_63081	THUMPD3	AD	1.3	1.2	2	0	0.7553	0.9429	0.1629	ID_63081	THUMPD3	0.0112997	4.36898	1.39614	13.672
ID_79466	POLM	ES	04:05:00	2	6.1	0	0.9525	0.3676	0.0456	ID_79466	POLM	0.0113087	0.0110696	0.000339426	0.361011
ID_57106	NRP2	AT	18	NA	NA	0	1	0.413	0.0668	ID_57106	NRP2	0.011315	31.22	2.1777	447.576
ID_38908	EIF5A	AP	3	NA	NA	0	1	0.4124	0.0499	ID_38908	EIF5A	0.0114056	60.2167	2.51768	1440.23
ID_20704	GOLT1B	ES	3	2	5	0	0.8717	0.2575	0.0413	ID_20704	GOLT1B	0.0114061	189.494	3.25964	11015.9
ID_41884	DBF4B	AT	13.2	NA	NA	0	1	0.9332	0.1512	ID_41884	DBF4B	0.01142	5.45598	1.46531	20.3149
ID_73172	ALDH7A1	ES	2	1	3.2	0	0.9715	0.0482	0.005	ID_73172	ALDH7A1	0.0114209	4252030000000000	3304.67	5.47e+27
ID_41883	DBF4B	AT	14.3	NA	NA	0	1	0.9332	0.1512	ID_41883	DBF4B	0.0114213	0.183291	0.0492269	0.682468
ID_3045	SCP2	ES	12	11	13	0	1	0.9735	0.2535	ID_3045	SCP2	0.011432	2.21798	1.19637	4.11197
ID_86722	NTRK2	AT	19	NA	NA	0	0.7957	0.4584	0.0318	ID_86722	NTRK2	0.0114394	80.912	2.68721	2436.27
ID_43481	SAP30BP	ES	9	8	10	0	1	0.0407	0.0064	ID_43481	SAP30BP	0.0114436	5.23e-14	2.66e-24	0.00102854
ID_60224	USP25	ES	8:9:10:11:12:13:14:15:16:17:18:21:22	7	23	0	0.9644	0.0769	0.0054	ID_60224	USP25	0.0114563	5.14e-16	7.24e-28	0.00036512
ID_54148	EVA1A	AP	2	NA	NA	0	0.962	0.37	0.0507	ID_54148	EVA1A	0.0114586	94.6772	2.78161	3222.51
ID_47099	INSR	ES	11	10	12	0	0.7981	0.8638	0.1534	ID_47099	INSR	0.0114748	0.181531	0.0483496	0.681572
ID_47240	ZNF414	AT	8	NA	NA	0	0.867	0.9165	0.191	ID_47240	ZNF414	0.0114847	0.278449	0.10332	0.75042
ID_47241	ZNF414	AT	6.2	NA	NA	0	0.867	0.9165	0.191	ID_47241	ZNF414	0.011485	3.59129	1.33258	9.67852
ID_54982	FBLN7	ES	5	4	6	0	0.7981	0.4784	0.0949	ID_54982	FBLN7	0.011496	0.0925989	0.0146277	0.586187
ID_1225	STMN1	AT	9	NA	NA	0	1	0.0197	0.0018	ID_1225	STMN1	0.0115076	1.82e-91	7.55e-162	4.38e-21
ID_13783	CD151	ES	1.2:2	1.1	3	1	0.9667	0.1901	0.0302	ID_13783	CD151	0.0115226	0.000749282	2.82e-06	0.199176
ID_73300	2019-09-08	AT	14	NA	NA	0	1	0.6793	0.0796	ID_73300	2019-09-08	0.0115355	0.0335255	0.00240553	0.46724
ID_73416	SAR1B	ES	10	9	11	0	0.9976	0.0201	0.0017	ID_73416	SAR1B	0.0115357	5.24e+36	1.69301e+08	1.62e+65
ID_50518	SIX5	RI	1.2	1.1	1.3	0	0.9644	0.3952	0.0604	ID_50518	SIX5	0.0115598	173.384	3.17138	9479.12
ID_33050	UBE2I	AP	3	NA	NA	0	0.9786	0.1008	0.0135	ID_33050	UBE2I	0.0115646	9.11123e+06	36.1185	2298390000000
ID_1226	STMN1	AT	8	NA	NA	0	1	0.0197	0.0018	ID_1226	STMN1	0.0115649	4.64e+90	1.96e+20	1.09e+161
ID_58536	SIRPA	AD	9.2	9.1	10	0	0.9335	0.2812	0.0464	ID_58536	SIRPA	0.0115844	0.0054916	9.66e-05	0.312252
ID_61686	ASCC2	ES	3	1	5	0	0.8836	0.7576	0.1284	ID_61686	ASCC2	0.0115855	8.23267	1.6023	42.2998
ID_76599	PTP4A1	ES	5	4	6	0	1	0.0043	0.0004	ID_76599	PTP4A1	0.0116108	1.42e-215	0	1.01e-48
ID_31729	EDC3	ES	6	5	7	0	0.9691	0.0575	0.0042	ID_31729	EDC3	0.0116252	1.89e-17	1.94e-30	0.00018468
ID_72906	PAM	ES	14	13	15	0	0.8646	0.8857	0.1748	ID_72906	PAM	0.0116328	0.241272	0.0799525	0.728085
ID_67553	PDCD10	AT	12	NA	NA	0	1	0.0613	0.004	ID_67553	PDCD10	0.011646	5e-14	2.32e-24	0.00107878
ID_67552	PDCD10	AT	11.2	NA	NA	0	1	0.0613	0.004	ID_67552	PDCD10	0.011646	20010400000000	926.974	4.32e+23
ID_83049	BIN3	ES	4	3	6	0	0.9881	0.3173	0.0351	ID_83049	BIN3	0.0116532	0.00975166	0.00026705	0.356094
ID_75778	C6orf1	AD	1.2	1.1	2.1	0	0.9929	0.7697	0.1104	ID_75778	C6orf1	0.0116671	7.37159	1.56083	34.8152
ID_18676	PPP2R1B	ME	4|5	3	6	0	0.9691	0.093	0.0103	ID_18676	PPP2R1B	0.0116831	3.53e-15	2.07e-26	0.000604359
ID_38168	TUBB3	AP	NA	NA	NA	0	1	0.8956	0.1924	ID_38168	TUBB3	0.0116851	0.303861	0.120382	0.76699
ID_13432	BCCIP	AT	9	NA	NA	0	1	0.5255	0.0912	ID_13432	BCCIP	0.0116851	0.0906821	0.0140348	0.585918
ID_82380	RHEB	ES	3	1.2	4	0	0.9905	0.0891	0.0113	ID_82380	RHEB	0.0116986	2.27847e+06	26.0061	199622000000
ID_55216	PROC	RI	5.2	5.1	5.3	0	0.9834	0.4939	0.0963	ID_55216	PROC	0.0117135	11.2271	1.71246	73.6058
ID_15999	CTNND1	ES	3:4.1:4.2:4.3	2.1	5	0	0.7933	1	0.2197	ID_15999	CTNND1	0.0117229	3.15216	1.29082	7.6975
ID_62146	LGALS1	ES	3	2.2	4	0	1	0.0176	0.0017	ID_62146	LGALS1	0.0117358	1.27e+47	29360174010	5.46e+83
ID_9577	FAM72A	AT	2	NA	NA	0	1	0.8896	0.2126	ID_9577	FAM72A	0.0117819	0.240021	0.0790615	0.728676
ID_86824	AUH	ES	4	3	5	0	0.9715	0.2747	0.0316	ID_86824	AUH	0.0117864	0.00222064	1.91e-05	0.257953
ID_12963	SUFU	AT	10.2	NA	NA	0	1	0.119	0.0177	ID_12963	SUFU	0.0118174	202171	14.9662	2731025330
ID_28536	IFT43	ES	2	1	3	0	1	0.2101	0.0372	ID_28536	IFT43	0.0118389	223.43	3.30995	15082
ID_61415	GUCD1	ES	6	5	7.2	0	0.9715	0.0591	0.01	ID_61415	GUCD1	0.0118569	3.55e-09	9.33e-16	0.0135438
ID_29152	SERPINA3	ES	3.2	2.2	4	0	1	0.0225	0.0019	ID_29152	SERPINA3	0.0118674	4.88e-38	4.2e-67	5.67e-09
ID_51481	ZNF83	AT	11	NA	NA	0	1	0.8882	0.2297	ID_51481	ZNF83	0.0118746	0.383216	0.181521	0.809022
ID_51483	ZNF83	AT	10.4	NA	NA	0	1	0.8882	0.2297	ID_51483	ZNF83	0.0118759	2.60947	1.23604	5.50897
ID_33380	IL32	RI	1.7	1.6	1.8	0	0.9976	0.5333	0.0643	ID_33380	IL32	0.011876	73.1	2.58116	2070.24
ID_75550	SLC17A4	AD	10.4	10.3	11	0	0.9786	0.9822	0.2038	ID_75550	SLC17A4	0.01188	2.6418	1.23937	5.63119
ID_44144	OXLD1	AD	1.2:1.3	1.1	2	0	0.9644	1	0.1869	ID_44144	OXLD1	0.0119096	3.47263	1.31609	9.16283
ID_50365	APOC1	ES	5.1:5.2:5.3	3.2	7	0	0.9952	0.7314	0.1146	ID_50365	APOC1	0.0119319	5.77228	1.47171	22.6398
ID_43385	NUP85	ES	8	7	9	0	0.9762	0.1969	0.0219	ID_43385	NUP85	0.0119448	0.00118058	6.16e-06	0.226441
ID_79218	BBS9	AT	10	NA	NA	0	1	0.5774	0.0693	ID_79218	BBS9	0.011946	12.4279	1.74218	88.654
ID_79219	BBS9	AT	26	NA	NA	0	1	0.5774	0.0693	ID_79219	BBS9	0.011946	0.0804644	0.0112798	0.573992
ID_3296	LEPR	AT	20	NA	NA	0	1	0.0379	0.0061	ID_3296	LEPR	0.0119494	1.38e-17	9.84e-31	0.000193291
ID_55300	SMPD4	ES	11	10	14	0	0.9287	0.7626	0.129	ID_55300	SMPD4	0.0119844	0.161733	0.03905	0.669851
ID_26857	EMC9	AA	3.2	2	3.3	0	1	0.5676	0.1109	ID_26857	EMC9	0.0119873	8.70234	1.60933	47.0573
ID_26611	DAD1	AD	1.2:1.3	1.1	2	0	1	0.0069	0.0008	ID_26611	DAD1	0.0119906	5.16e-102	4.98e-181	5.35e-23
ID_70173	SLC9B2	ES	00:16:17.100000	15	18	0	0.9002	0.337	0.0228	ID_70173	SLC9B2	0.011991	2.62e-05	7e-09	0.0983319
ID_655795	CES1	AA	10.1	7	10.2	1	0.8361	0.8044	0.1299	ID_655795	CES1	0.0119934	0.219477	0.0672329	0.716464
ID_88164	SDCCAG3	ES	2	1	4	0	0.9454	1	0.1607	ID_88164	SDCCAG3	0.0120022	4.30193	1.37806	13.4294
ID_84008	ADHFE1	ES	4	3	5	0	0.7981	0.5056	0.0596	ID_84008	ADHFE1	0.01201	0.0159234	0.000629664	0.402683
ID_50538	CCDC61	ES	7:8.1:9.1:9.2:10	6	11	0	0.981	0.1694	0.0169	ID_50538	CCDC61	0.0120454	2.26e-05	5.35e-09	0.0956816
ID_68055	EIF4A2	AA	9.1	8	9.2	0	1	0.058	0.01	ID_68055	EIF4A2	0.0120535	1688452571	105.619	2.6992e+16
ID_8628	NR1I3	RI	6.5	6.4	6.6	0	0.9454	0.9808	0.2253	ID_8628	NR1I3	0.0120674	3.07089	1.2788	7.37438
ID_51169	MYH14	ES	7	6.1	9	0	0.8266	0.976	0.0664	ID_51169	MYH14	0.0120715	29406.5	9.53393	9.07013e+07
ID_4336	CSDE1	ES	3	2	4	0	0.9026	0.0637	0.008	ID_4336	CSDE1	0.0120878	6.93e-17	1.66e-29	0.000289129
ID_82226	RARRES2	RI	1.3	1.2	1.4	0	1	0.7544	0.0574	ID_82226	RARRES2	0.0120889	14.0689	1.78428	110.933
ID_2145	EBNA1BP2	AP	2.1	NA	NA	0	0.9976	0.7627	0.195	ID_2145	EBNA1BP2	0.0120985	3.48175	1.31402	9.22555
ID_2146	EBNA1BP2	AP	NA	NA	NA	0	0.9976	0.7627	0.195	ID_2146	EBNA1BP2	0.0120985	0.287212	0.108395	0.761021
ID_60529	CLDN14	AP	6	NA	NA	0	0.9905	1	0.2524	ID_60529	CLDN14	0.0121281	2.10764	1.17705	3.77396
ID_44472	ENOSF1	ES	07:08:00	5	9.2	0	0.981	0.227	0.0322	ID_44472	ENOSF1	0.0121321	0.00234689	2.07e-05	0.266186
ID_26851	PSME1	RI	10.3	10.2	10.4	0	0.9952	0.9288	0.1446	ID_26851	PSME1	0.0121488	4.88421	1.41406	16.8702
ID_31610	CD276	AT	10.2	NA	NA	0	1	0.0887	0.0151	ID_31610	CD276	0.0121521	3.31e-07	2.85e-12	0.0384186
ID_31611	CD276	AT	11	NA	NA	0	1	0.0887	0.0151	ID_31611	CD276	0.0121521	3.02297e+06	26.0291	351083000000
ID_19378	FOXRED1	ES	2	1.1	3	0	0.9905	0.1237	0.0135	ID_19378	FOXRED1	0.012165	3.1e-08	4.19e-14	0.0229543
ID_50104	RABAC1	AD	1.2	1.1	2	0	1	0.0426	0.0056	ID_50104	RABAC1	0.0121726	4.08069e+16	4217.35	3.95e+29
ID_60531	CLDN14	AP	4	NA	NA	0	0.9905	1	0.2532	ID_60531	CLDN14	0.0121873	0.474709	0.26511	0.850019
ID_20	C1orf159	AA	5.1:5.2:5.3:5.4	4.4	5.5	0	0.7506	1	0.124	ID_20	C1orf159	0.0121908	0.0674927	0.00820009	0.555515
ID_64852	USP4	AT	7	NA	NA	0	1	0.3743	0.0537	ID_64852	USP4	0.0122068	50.7763	2.35346	1095.51
ID_4142	DENND2D	AP	NA	NA	NA	0	0.7815	1	0.2629	ID_4142	DENND2D	0.0122093	3.0555	1.27556	7.31922
ID_4141	DENND2D	AP	2	NA	NA	0	0.7815	1	0.2629	ID_4141	DENND2D	0.0122104	0.327283	0.136629	0.783981
ID_44047	RNF213	AT	18.2	NA	NA	0	1	0.3965	0.0579	ID_44047	RNF213	0.0122411	45.8626	2.29911	914.867
ID_24096	TXNRD1	AP	9	NA	NA	0	0.8765	0.219	0.028	ID_24096	TXNRD1	0.0122417	630.086	4.06611	97638.6
ID_28799	EFCAB11	AT	12	NA	NA	0	1	0.6225	0.0786	ID_28799	EFCAB11	0.0122996	0.0723964	0.00926779	0.565533
ID_24310	UBE3B	ES	19	18	20	0	0.829	0.6247	0.0781	ID_24310	UBE3B	0.0123017	21.3695	1.94383	234.926
ID_95769	GMPPA	AD	1.2:1.3	1.1	2.1	1	0.8266	0.3484	0.061	ID_95769	GMPPA	0.0123027	41.1876	2.24131	756.885
ID_40186	RHOT1	ES	19.3:20	19.1	22	0	0.8955	1	0.1719	ID_40186	RHOT1	0.0123224	0.222915	0.0688108	0.722142
ID_87630	SLC2A8	ES	5	4	6	0	0.9952	0.6693	0.0754	ID_87630	SLC2A8	0.0123232	0.0904955	0.0137891	0.593905
ID_9968	DNAH14	AT	90	NA	NA	0	0.9881	0.9852	0.2142	ID_9968	DNAH14	0.0123267	0.355819	0.158406	0.799257
ID_43738	2019-09-09	ES	10.3:16.1:17.1:17.2	10.2	17.3	0	0.9905	0.0076	0.0008	ID_43738	2019-09-09	0.0123269	9.23e-91	2.84e-161	3e-20
ID_35597	EARS2	RI	11.2	11.1	11.3	0	1	0.2578	0.039	ID_35597	EARS2	0.0123308	0.00453525	6.63e-05	0.310407
ID_72617	DMGDH	AT	17	NA	NA	0	0.9881	0.815	0.1183	ID_72617	DMGDH	0.0123549	0.151883	0.0346972	0.664847
ID_72618	DMGDH	AT	15	NA	NA	0	0.9881	0.815	0.1183	ID_72618	DMGDH	0.0123554	6.58399	1.50409	28.8206
ID_32844	LUC7L	ES	4	3	5	0	0.962	0.8643	0.174	ID_32844	LUC7L	0.0123563	0.242622	0.0799966	0.735848
ID_71201	HPGD	ES	3	2	4	0	0.7957	0.1073	0.006	ID_71201	HPGD	0.0123626	2.08e-10	5.39e-18	0.00800845
ID_26367	CUL4A	AP	3	NA	NA	0	0.848	0.6651	0.124	ID_26367	CUL4A	0.0123859	8.40399	1.58482	44.5648
ID_40954	NT5C3B	ES	3	2	4	0	0.9549	0.5906	0.0887	ID_40954	NT5C3B	0.0124174	0.0484315	0.00451138	0.519932
ID_60264	ATP5J	AD	1.5	1.4	3	0	1	0.0759	0.0095	ID_60264	ATP5J	0.0124224	2.5e-10	7.4e-18	0.00843305
ID_292	FAM213B	ES	00:05:06.200000	4.2	6.3	0	0.8385	0.0441	0.0027	ID_292	FAM213B	0.012451	4.84e-21	5.66e-37	4.14e-05
ID_23817	HAL	ES	7	6	8	0	0.7648	0.1637	0.0187	ID_23817	HAL	0.0124552	4.2e-05	1.55e-08	0.113769
ID_8050	FAM189B	ES	02:03:04	1	5	0	0.9501	1	0.1563	ID_8050	FAM189B	0.0124649	0.251905	0.0854223	0.742852
ID_77920	PEX7	AT	12	NA	NA	0	1	0.0832	0.0137	ID_77920	PEX7	0.0124848	1.32e-06	3.2e-11	0.0540855
ID_77921	PEX7	AT	4	NA	NA	0	1	0.0832	0.0137	ID_77921	PEX7	0.0124848	760162	18.4893	31253111805
ID_38882	CTDNEP1	RI	11.2	11.1	11.3	0	1	0.0426	0.0042	ID_38882	CTDNEP1	0.0125111	6.18e-17	1.18e-29	0.00032505
ID_61626	NF2	ES	16.1	15	17	0	0.9905	0.8012	0.1851	ID_61626	NF2	0.0125317	0.2766	0.100858	0.758562
ID_34424	LYRM1	ES	5	2.2	7	0	0.9145	0.4611	0.0843	ID_34424	LYRM1	0.0125584	13.5069	1.7491	104.303
ID_9969	DNAH14	AT	9	NA	NA	0	0.9881	0.9852	0.2142	ID_9969	DNAH14	0.0125712	2.80175	1.24751	6.29237
ID_21332	SLC38A4	ES	2	1	3	0	0.8575	0.6562	0.1166	ID_21332	SLC38A4	0.0125775	0.137811	0.0290591	0.653561
ID_1689	CSMD2	AT	NA	NA	NA	0	1	0.8999	0.228	ID_1689	CSMD2	0.0125794	2.57114	1.22464	5.39812
ID_14203	PPFIBP2	AP	NA	NA	NA	0	0.7886	0.9384	0.1654	ID_14203	PPFIBP2	0.0125848	0.251126	0.0848261	0.743452
ID_10170	MRPL55	AA	2.2:2.3:2.4	1.1	2.5	0	0.9929	0.8017	0.1062	ID_10170	MRPL55	0.0126211	0.13673	0.0286313	0.652959
ID_61830	RNF185	ES	04:05:00	3	6	0	0.9454	0.1951	0.0182	ID_61830	RNF185	0.0126339	0.000116954	9.5e-08	0.143927
ID_57246	RPE	ES	5	4	6	0	0.9477	0.3173	0.0542	ID_57246	RPE	0.0126377	0.0113933	0.000338307	0.383694
ID_8060	FDPS	AA	3.1	1.2	3.2	1	0.9169	0.5719	0.115	ID_8060	FDPS	0.0126408	7.86382	1.55491	39.7706
ID_79084	CHN2	AP	NA	NA	NA	0	0.8741	1	0.2707	ID_79084	CHN2	0.012651	2.29917	1.19498	4.42368
ID_45831	LINC00908	AT	5	NA	NA	0	1	0.0538	0.0036	ID_45831	LINC00908	0.0126674	1.06177e+17	4368.31	2.58e+30
ID_33782	MGRN1	ES	12	11	13	0	0.943	0.4595	0.0835	ID_33782	MGRN1	0.0126882	0.0671298	0.00802473	0.561566
ID_80998	EPHB4	ES	16	15	17	0	1	0.1092	0.015	ID_80998	EPHB4	0.0126928	6.34e-07	8.47e-12	0.0474491
ID_42158	NFE2L1	AP	2	NA	NA	0	0.9454	0.8803	0.1555	ID_42158	NFE2L1	0.0127128	0.227206	0.0708248	0.728879
ID_61955	TOM1	ES	7.1:7.2	6.2	8	0	0.9952	0.0226	0.0018	ID_61955	TOM1	0.0127486	3.66e-36	4.77e-64	2.81e-08
ID_82829	FGL1	ES	5.2	4	6.2	0	0.8432	1	0.1836	ID_82829	FGL1	0.0127725	0.288056	0.108149	0.767242
ID_44155	ARL16	ES	2.3:3	2.2	5	0	0.9952	0.3473	0.0331	ID_44155	ARL16	0.0127749	27192.2	8.78857	8.41336e+07
ID_79734	SEC61G	AD	2.3	2.2	3	0	1	0.0444	0.0073	ID_79734	SEC61G	0.0127812	2058970000000	417.266	1.02e+22
ID_24995	ABCB9	AP	2	NA	NA	0	1	0.3417	0.0546	ID_24995	ABCB9	0.0127838	59.2651	2.38353	1473.59
ID_48761	ZNF738	AT	7.3	NA	NA	0	1	0.8391	0.1777	ID_48761	ZNF738	0.0127937	3.63879	1.31617	10.06
ID_46317	PTBP1	ES	9.1:9.2	8	10	0	0.9572	0.4205	0.0523	ID_46317	PTBP1	0.0128203	0.0163824	0.000642881	0.417468
ID_67964	CHRD	RI	9.2	9.1	9.3	0	0.9026	0.6484	0.1137	ID_67964	CHRD	0.012828	8.07271	1.55828	41.8208
ID_62665	FBLN1	AT	17	NA	NA	0	1	0.9004	0.1678	ID_62665	FBLN1	0.0128297	3.84058	1.3308	11.0836
ID_48565	ARMC6	ES	6	5	7	0	0.9929	0.1374	0.0185	ID_48565	ARMC6	0.0128405	5.99e-05	2.83e-08	0.126953
ID_30991	TPM1	ES	6	5.2	7	0	0.9976	0.054	0.007	ID_30991	TPM1	0.0128411	8.59e-14	4.38e-24	0.00168399
ID_62570	TSPO	AP	2	NA	NA	0	0.9857	0.1513	0.0187	ID_62570	TSPO	0.0128929	158862	12.6389	1996781932
ID_10146	MRPL55	ES	1.2:2.2:2.8	1.1	2.9	0	1	0.9358	0.2021	ID_10146	MRPL55	0.0128958	0.321841	0.131694	0.786536
ID_62571	TSPO	AP	NA	NA	NA	0	0.9857	0.1513	0.0187	ID_62571	TSPO	0.0128977	6.3e-06	5.01e-10	0.0791683
ID_82334	FASTK	RI	5.6	5.5	5.7	0	1	0.2354	0.0416	ID_82334	FASTK	0.0129073	212.363	3.10916	14504.9
ID_33174	RPS2	ES	2	1.3	3	0	1	0.0064	0.0008	ID_33174	RPS2	0.0129082	3.03e-111	2.29e-198	4.02e-24
ID_26705	ACIN1	AD	9.2:9.3	9.1	10	0	0.867	0.9348	0.184	ID_26705	ACIN1	0.0129736	3.76136	1.32272	10.696
ID_44095	BAIAP2	ES	17.1:17.2	16.1	18.1	0	0.9952	0.885	0.1547	ID_44095	BAIAP2	0.012981	0.299332	0.115576	0.775244
ID_61604	AP1B1	AA	19.1	18	19.2	0	0.9881	0.1995	0.0224	ID_61604	AP1B1	0.0129883	0.000499838	1.24e-06	0.201129
ID_17647	STARD10	AD	3.2	3.1	4	0	0.962	0.8925	0.1344	ID_17647	STARD10	0.0129971	6.55706	1.48682	28.9175
ID_62147	LGALS1	AA	2.1	1	2.2	0	1	0.0695	0.0073	ID_62147	LGALS1	0.0130075	3075910000000	429.329	2.2e+22
ID_21780	LETMD1	ES	00:02:03.200000	1.2	7	0	0.7553	0.849	0.1604	ID_21780	LETMD1	0.0130238	6.457	1.48136	28.145
ID_78502	PDCD2	AA	2.1	1.3	2.2	0	0.9881	0.7067	0.0597	ID_78502	PDCD2	0.0130368	177.76	2.9768	10614.9
ID_60161	ZGPAT	AA	6.1	5.2	6.2	0	1	0.8978	0.2393	ID_60161	ZGPAT	0.0130438	0.308618	0.12199	0.780761
ID_29065	IFI27L1	ES	5	4.3	6	0	0.9905	0.6922	0.084	ID_29065	IFI27L1	0.0130456	7.08628	1.51011	33.2528
ID_60114	ARFGAP1	ES	3	2	4	0	0.9549	0.1343	0.0178	ID_60114	ARFGAP1	0.0130852	2.3e-05	5e-09	0.106008
ID_52837	ADCY3	AA	14.1	13	14.2	0	0.8076	0.4906	0.0811	ID_52837	ADCY3	0.0130885	0.054387	0.0054537	0.542374
ID_57810	MFF	ES	9	7	11	1	0.9834	0.4931	0.0807	ID_57810	MFF	0.0131113	0.0565061	0.00583655	0.547058
ID_53238	RMDN2	ES	4.2:5.1	3	6	0	0.791	0.0215	0.0031	ID_53238	RMDN2	0.0131118	9.62e+26	461613	2e+48
ID_75518	ALDH5A1	RI	1.2	1.1	1.3	0	0.8409	0.0388	0.0022	ID_75518	ALDH5A1	0.0131294	8.84e-25	8.69e-44	9e-06
ID_1754	TRAPPC3	AD	1.2:1.3	1.1	2	0	0.9881	0.5311	0.0708	ID_1754	TRAPPC3	0.013184	12.1178	1.68561	87.1148
ID_45134	MAPRE2	AP	2	NA	NA	0	0.8979	0.4018	0.076	ID_45134	MAPRE2	0.0132007	17.9784	1.82993	176.631
ID_17242	CDK2AP2	AT	4	NA	NA	0	1	0.0725	0.0063	ID_17242	CDK2AP2	0.0132084	7.40378e+19	14270	3.84e+35
ID_17243	CDK2AP2	AT	3.2	NA	NA	0	1	0.0725	0.0063	ID_17243	CDK2AP2	0.0132084	1.35e-20	2.6e-36	7.01e-05
ID_61440	GGT1	AA	7.1:7.2	6.2	7.3	0	0.8884	0.9232	0.1229	ID_61440	GGT1	0.0132119	5.90592	1.44958	24.0621
ID_48193	SMIM7	ES	00:05:06.100000	2	7.1	0	0.9929	0.009	0.0007	ID_48193	SMIM7	0.0132343	4.46e+97	2.48e+20	8e+174
ID_80981	TFR2	ES	08:09:00	7	11	0	0.9905	0.1185	0.0109	ID_80981	TFR2	0.0132402	6.02e-07	7.2e-12	0.0502395
ID_82385	PRKAG2	AP	NA	NA	NA	0	0.9857	0.6418	0.092	ID_82385	PRKAG2	0.0132631	0.128123	0.0252009	0.651385
ID_10474	COX20	ES	02:03:00	1	4	1	1	0.4477	0.074	ID_10474	COX20	0.013279	15.0876	1.76083	129.278
ID_47713	ECSIT	AP	2	NA	NA	0	0.9739	0.18	0.0263	ID_47713	ECSIT	0.0132964	3.73e-05	1.16e-08	0.119498
ID_37530	HP	ES	00:06:07.100000	4	8.1	0	0.9952	0.0305	0.0066	ID_37530	HP	0.0132975	4.02e-16	2.61e-28	0.000620669
ID_73318	UQCRQ	RI	1.3	1.2	1.4	0	1	0.4384	0.0514	ID_73318	UQCRQ	0.0133004	36.4852	2.11534	629.293
ID_74082	CD74	ES	00:09:10.100000	4	10.2	0	0.9952	0.3849	0.049	ID_74082	CD74	0.0133111	37.1634	2.12277	650.623
ID_20063	LPCAT3	ES	6	5.1	7	0	0.962	0.0337	0.0053	ID_20063	LPCAT3	0.0133139	5.58e-16	4.66e-28	0.000667648
ID_47714	ECSIT	AP	NA	NA	NA	0	0.9739	0.18	0.0263	ID_47714	ECSIT	0.0133177	26762.7	8.34782	8.57997e+07
ID_1426	MECR	AA	2.1	1	2.2	0	0.9667	0.5447	0.0898	ID_1426	MECR	0.0133286	10.7611	1.63938	70.6372
ID_86041	IFT74	AT	23	NA	NA	0	0.9976	0.1957	0.0375	ID_86041	IFT74	0.0133482	0.00350682	3.98e-05	0.308764
ID_86042	IFT74	AT	16	NA	NA	0	0.9976	0.1957	0.0375	ID_86042	IFT74	0.0133482	285.159	3.23872	25107.2
ID_44244	PYCR1	ES	7	6	8.1	0	0.8266	0.3889	0.066	ID_44244	PYCR1	0.0133483	0.0419397	0.00340083	0.517209
ID_32464	IDH2	ES	11	10	12	0	1	0.0043	0.0005	ID_32464	IDH2	0.013353	2.6e-144	4.72e-258	1.43e-30
ID_23424	TBC1D15	ES	4	1	5	0	0.8124	0.1111	0.0151	ID_23424	TBC1D15	0.0133583	206190	12.7143	3343820325
ID_12760	HPS1	AT	10.2	NA	NA	0	1	0.4742	0.0805	ID_12760	HPS1	0.013386	15.1598	1.75819	130.714
ID_12761	HPS1	AT	20	NA	NA	0	1	0.4742	0.0805	ID_12761	HPS1	0.013386	0.0659639	0.0076503	0.568766
ID_85656	ZNF7	AT	9	NA	NA	0	1	0.3453	0.0282	ID_85656	ZNF7	0.0134118	9.11e-06	9.2e-10	0.0901287
ID_58647	TMEM230	AD	1.2	1.1	4	0	0.9644	0.3452	0.0456	ID_58647	TMEM230	0.0134122	98.3471	2.58924	3735.51
ID_29661	C14orf80	ES	9	8	10	0	0.9074	1	0.1988	ID_29661	C14orf80	0.0134303	0.246997	0.0815094	0.748474
ID_86876	ECM2	AT	10	NA	NA	0	1	0.6781	0.1143	ID_86876	ECM2	0.0134311	7.89066	1.53412	40.5852
ID_51107	PNKP	AA	3.1	2.2	3.2	0	0.9501	0.5072	0.0796	ID_51107	PNKP	0.0134351	13.319	1.70972	103.757
ID_64746	IP6K2	AD	11.6:11.7	11.5	11.9	0	0.9335	1	0.3026	ID_64746	IP6K2	0.0134439	0.451863	0.240685	0.848327
ID_60599	ETS2	AP	2.1	NA	NA	0	0.7672	0.6453	0.1307	ID_60599	ETS2	0.0134447	10.7541	1.6353	70.7212
ID_60600	ETS2	AP	NA	NA	NA	0	0.7672	0.6453	0.1307	ID_60600	ETS2	0.0134447	0.0929879	0.01414	0.611509
ID_67884	EIF4G1	ES	4	3.2	5	0	0.8385	0.037	0.0022	ID_67884	EIF4G1	0.0134526	4.85e+25	207333	1.13e+46
ID_9666	CD34	AP	NA	NA	NA	0	0.8599	0.2892	0.0399	ID_9666	CD34	0.0134555	0.00384619	4.68e-05	0.316358
ID_33424	IL32	ES	1.3:1.4:1.5	1.1	1.8	0	0.9976	0.7459	0.1217	ID_33424	IL32	0.0134603	0.129621	0.0256424	0.655223
ID_59717	ZMYND8	ES	16	15	17	0	0.8385	0.2859	0.0372	ID_59717	ZMYND8	0.0134626	0.0054151	8.63e-05	0.339678
ID_9667	CD34	AP	5	NA	NA	0	0.8599	0.2892	0.0399	ID_9667	CD34	0.0134632	259.901	3.15958	21379
ID_85534	MAF1	RI	6.2	6.1	6.3	0	1	0.2844	0.0405	ID_85534	MAF1	0.0134802	127.169	2.7233	5938.39
ID_85874	MPDZ	ES	38	37	39	0	0.8884	0.3945	0.0561	ID_85874	MPDZ	0.0134873	0.0245597	0.00129772	0.464798
ID_43703	SEC14L1	AP	NA	NA	NA	0	1	0.707	0.1414	ID_43703	SEC14L1	0.0135008	5.46623	1.42034	21.037
ID_54543	KANSL3	ES	23.1:23.2:23.3	22	24	0	0.9311	0.454	0.0793	ID_54543	KANSL3	0.0135048	0.0814142	0.0111274	0.595672
ID_52964	MPV17	AT	5	NA	NA	0	1	0.1441	0.0193	ID_52964	MPV17	0.0135218	3.34e-06	1.51e-10	0.0740978
ID_84527	FAM92A1	ME	7|8	5.1	9.2	0	0.7791	0.1006	0.0146	ID_84527	FAM92A1	0.0135284	1.23e-10	1.67e-18	0.00901399
ID_50420	MARK4	ES	16	15	17	0	0.9715	0.3708	0.0551	ID_50420	MARK4	0.0135559	0.00581674	9.77e-05	0.346155
ID_26256	CARKD	RI	7.2	7.1	7.3	0	0.9287	0.9532	0.1273	ID_26256	CARKD	0.0135599	5.88262	1.44076	24.0187
ID_77615	MED23	AT	NA	NA	NA	0	0.9929	0.8137	0.1261	ID_77615	MED23	0.0135609	6.86594	1.48737	31.6942
ID_17534	LRTOMT	AA	6.3:6.4	6.1	6.5	0	0.9976	0.1247	0.0142	ID_17534	LRTOMT	0.0135706	9.6e-06	9.95e-10	0.0925482
ID_52304	ZNF530	ES	4.1	3	5	0	0.7981	0.9525	0.266	ID_52304	ZNF530	0.0135707	0.393403	0.187557	0.825167
ID_44096	BAIAP2	ES	17.1	16.1	18.1	0	0.9715	0.9273	0.2099	ID_44096	BAIAP2	0.0135891	0.310554	0.12269	0.786078
ID_85427	MROH6	ES	10	9.2	11	0	0.8124	0.5865	0.0963	ID_85427	MROH6	0.0136047	0.0789337	0.0105041	0.593153
ID_38722	NLRP1	ES	14	13	15	0	0.8955	0.6098	0.1265	ID_38722	NLRP1	0.0136082	8.36527	1.54784	45.21
ID_10189	GUK1	AD	5.4	5.3	6	0	1	0.0437	0.0074	ID_10189	GUK1	0.0136114	2923270000000	366.025	2.33e+22
ID_56965	CARF	AT	10.2	NA	NA	0	1	0.2514	0.0441	ID_56965	CARF	0.0136486	0.00457426	6.32e-05	0.330825
ID_56967	CARF	AT	19	NA	NA	0	1	0.2514	0.0441	ID_56967	CARF	0.0136505	218.558	3.02232	15805
ID_17321	PPP6R3	ES	11	10	12	0	0.8836	0.0937	0.0135	ID_17321	PPP6R3	0.0136551	54497783634	159.915	1.85725e+19
ID_33229	MLST8	AA	3.1	1	3.2	0	0.9145	0.688	0.1146	ID_33229	MLST8	0.0136585	7.66139	1.5188	38.647
ID_657	FBXO44	ES	5.2:6	5.1	7	0	0.9834	0.6079	0.1197	ID_657	FBXO44	0.0136604	0.152185	0.0340834	0.679516
ID_78125	RAET1E	AT	4.2	NA	NA	0	0.9834	0.377	0.0373	ID_78125	RAET1E	0.0136779	148.032	2.78675	7863.45
ID_34061	CPPED1	ES	3	2	4.1	0	1	0.31	0.0302	ID_34061	CPPED1	0.0137005	6545.26	6.05122	7.07963e+06
ID_86077	APTX	AA	11.1	10	11.2	0	0.9976	0.1935	0.0381	ID_86077	APTX	0.0137021	267.446	3.14256	22760.8
ID_77205	AK9	AT	41	NA	NA	0	0.9976	0.8415	0.1307	ID_77205	AK9	0.0137902	0.141444	0.0298237	0.670819
ID_36281	C16orf58	ES	2	1.3	3	0	0.981	0.0326	0.0037	ID_36281	C16orf58	0.013814	1.32e-20	1.96e-36	8.82e-05
ID_46619	SLC39A3	AT	3.2	NA	NA	0	1	0.497	0.0969	ID_46619	SLC39A3	0.0138259	0.104818	0.0173997	0.631439
ID_57398	FN1	ES	25	24	26	0	0.9881	0.8474	0.1612	ID_57398	FN1	0.0138263	3.63687	1.30105	10.1662
ID_89926	PLS3	ME	4|5	3	6	0	1	0.1669	0.0347	ID_89926	PLS3	0.013929	0.000279594	4.11e-07	0.189997
ID_89072	WDR45	AT	15	NA	NA	0	1	0.3756	0.0706	ID_89072	WDR45	0.0139468	19.7851	1.83201	213.673
ID_89071	WDR45	AT	13	NA	NA	0	1	0.3756	0.0706	ID_89071	WDR45	0.0139485	0.0505446	0.0046801	0.545876
ID_45462	DYM	AP	NA	NA	NA	0	0.8527	0.0706	0.0043	ID_45462	DYM	0.0139711	6.56e-13	1.27e-22	0.00339971
ID_45464	DYM	AP	4	NA	NA	0	0.8527	0.0706	0.0043	ID_45464	DYM	0.0139711	1524610000000	294.143	7.9e+21
ID_2190	PTPRF	ES	14	13	15	0	0.8456	0.7537	0.0796	ID_2190	PTPRF	0.0139744	0.0173255	0.000682657	0.439715
ID_67978	EHHADH	AT	7	NA	NA	0	1	0.0999	0.0109	ID_67978	EHHADH	0.0139935	5.85e-08	9.96e-14	0.0343405
ID_54073	MOGS	RI	1.2	1.1	1.3	0	0.9454	0.5111	0.088	ID_54073	MOGS	0.0140349	26.0741	1.93286	351.738
ID_56563	INPP1	ES	3	1	4	0	0.8171	0.7734	0.1282	ID_56563	INPP1	0.0140442	7.45861	1.50068	37.0705
ID_16635	TRMT112	RI	1.2	1.1	1.3	0	1	0.0748	0.011	ID_16635	TRMT112	0.0140606	4.4013e+08	55.5811	3485270000000000
ID_67979	EHHADH	AT	2.2	NA	NA	0	1	0.0999	0.0109	ID_67979	EHHADH	0.0140687	1.6933e+07	28.7617	9969080000000
ID_72190	IPO11	AT	32	NA	NA	0	1	0.4417	0.0713	ID_72190	IPO11	0.0140722	0.0320405	0.0020555	0.499438
ID_72191	IPO11	AT	35	NA	NA	0	1	0.4417	0.0713	ID_72191	IPO11	0.0140729	31.2098	2.0022	486.49
ID_71318	ACSL1	AP	4	NA	NA	0	0.8907	0.196	0.0115	ID_71318	ACSL1	0.0140912	452242	13.8116	14808087202
ID_12256	AP3M1	ES	2	1	3	0	0.8242	0.773	0.124	ID_12256	AP3M1	0.0141156	7.71183	1.509	39.4117
ID_46933	DUS3L	ES	3.2:3.3:4.1:4.2:4.3	3.1	5	0	0.9976	0.0497	0.0024	ID_46933	DUS3L	0.0141262	1.07e-24	7.71e-44	1.49e-05
ID_60087	TCFL5	AT	6	NA	NA	0	1	0.6102	0.0631	ID_60087	TCFL5	0.0141274	19.3822	1.81628	206.835
ID_56790	CFLAR	AT	8.2	NA	NA	0	1	0.2649	0.0298	ID_56790	CFLAR	0.0141282	588.729	3.61097	95985.7
ID_60086	TCFL5	AT	7	NA	NA	0	1	0.6102	0.0631	ID_60086	TCFL5	0.01413	0.0515967	0.00483495	0.550619
ID_32942	RHOT2	ES	5	4.2	6	0	0.9739	0.5933	0.0562	ID_32942	RHOT2	0.0141824	0.0777307	0.0100932	0.598629
ID_33433	IL32	ES	1.3:1.4:1.5:1.8	1.1	1.9	0	1	0.5107	0.0729	ID_33433	IL32	0.0141905	0.0249455	0.00130577	0.47656
ID_3099	HSPB11	AT	7	NA	NA	0	1	0.2647	0.0411	ID_3099	HSPB11	0.0141911	0.00381305	4.45e-05	0.326838
ID_87146	RAD23B	AP	NA	NA	NA	0	0.9501	0.2926	0.0595	ID_87146	RAD23B	0.0141966	143.554	2.71031	7603.47
ID_69007	PGM2	ES	8	7	9	0	0.9311	0.1529	0.0165	ID_69007	PGM2	0.0141972	2.47e-06	8.15e-11	0.0748795
ID_87147	RAD23B	AP	2	NA	NA	0	0.9501	0.2926	0.0595	ID_87147	RAD23B	0.0141983	0.00696662	0.00013153	0.368994
ID_24394	ANKRD13A	AP	NA	NA	NA	0	0.772	1	0.1254	ID_24394	ANKRD13A	0.0142065	5.25345	1.39498	19.7843
ID_24395	ANKRD13A	AP	2	NA	NA	0	0.772	1	0.1254	ID_24395	ANKRD13A	0.0142065	0.190351	0.0505452	0.716854
ID_45802	TIMM21	AT	4	NA	NA	0	1	0.1263	0.0162	ID_45802	TIMM21	0.0142141	3.52e-07	2.45e-12	0.0507591
ID_45801	TIMM21	AT	7	NA	NA	0	1	0.1263	0.0162	ID_45801	TIMM21	0.0142141	2.83743e+06	19.7009	408664000000
ID_41707	DHX8	ES	2	1	3	0	0.7957	0.1982	0.0324	ID_41707	DHX8	0.0142167	0.00154072	8.7e-06	0.272838
ID_62152	TRIOBP	AT	26	NA	NA	0	1	0.3982	0.0616	ID_62152	TRIOBP	0.0142269	0.0334518	0.00221152	0.505998
ID_62153	TRIOBP	AT	19	NA	NA	0	1	0.3982	0.0616	ID_62153	TRIOBP	0.0142269	29.8937	1.97629	452.177
ID_38915	GPS2	RI	1.2	1.1	1.3	0	0.9026	0.4654	0.0482	ID_38915	GPS2	0.0142477	83.475	2.42627	2871.93
ID_17557	LAMTOR1	RI	4.2	4.1	4.3	0	1	0.0935	0.0117	ID_17557	LAMTOR1	0.0142494	9.11817e+06	24.7834	3354700000000
ID_50819	HSD17B14	AA	4.1	3	4.2	0	0.848	0.1858	0.0206	ID_50819	HSD17B14	0.0142542	2.78e-08	2.52e-14	0.0306749
ID_17665	ATG16L2	ES	4.3:5:6.1:6.3:7:8:9:10:11:12:13	3	14	0	0.8361	0.5036	0.0507	ID_17665	ATG16L2	0.0142861	0.0346883	0.00235693	0.510529
ID_84847	OXR1	AP	5	NA	NA	0	0.8907	0.803	0.181	ID_84847	OXR1	0.014295	0.19388	0.0521812	0.720363
ID_71926	ZNF131	RI	7.2:7.3	7.1	7.4	0	0.7815	0.8344	0.1532	ID_71926	ZNF131	0.0142972	0.184187	0.0475783	0.713035
ID_46257	PQLC1	ES	06:07:09	5	10	0	0.9881	0.6818	0.1312	ID_46257	PQLC1	0.0143273	0.127496	0.0245244	0.662815
ID_21708	ATF1	AP	2	NA	NA	0	0.9264	0.2773	0.0396	ID_21708	ATF1	0.0143616	0.000309575	4.8e-07	0.199661
ID_21709	ATF1	AP	NA	NA	NA	0	0.9264	0.2773	0.0396	ID_21709	ATF1	0.0143616	3230.24	5.00849	2.08335e+06
ID_235365	APOA2	ES	2	1.1	4.1	1	0.7672	0.7066	0.1043	ID_235365	APOA2	0.0143658	22.6589	1.86284	275.616
ID_26212	TPP2	ES	24	23	25	0	0.9169	0.5841	0.0979	ID_26212	TPP2	0.0143678	0.0731358	0.00900917	0.593712
ID_66874	CEP63	AP	NA	NA	NA	0	0.8931	0.6646	0.1157	ID_66874	CEP63	0.0144055	7.80303	1.50518	40.4519
ID_77204	AK9	AT	20.2	NA	NA	0	0.9976	0.2078	0.0157	ID_77204	AK9	0.0144065	6155.42	5.67736	6.67373e+06
ID_33175	RPS2	RI	1.2	1.1	1.3	0	0.9905	0.9301	0.1985	ID_33175	RPS2	0.0144206	3.3165	1.26931	8.66551
ID_47919	TRMT1	ES	03:04:00	2.4	5	0	0.9929	0.0784	0.0132	ID_47919	TRMT1	0.0144367	1.76e-07	6.78e-13	0.0454085
ID_68866	LCORL	AT	9	NA	NA	0	1	0.7191	0.1161	ID_68866	LCORL	0.0144392	0.139108	0.0286397	0.675675
ID_68865	LCORL	AT	8	NA	NA	0	1	0.7191	0.1161	ID_68865	LCORL	0.0144427	7.18813	1.4799	34.9141
ID_47675	TMEM205	ES	2.2:2.5	2.1	2.6	0	1	0.6011	0.1034	ID_47675	TMEM205	0.0144442	8.46156	1.52861	46.8386
ID_16428	TMEM223	AT	2	NA	NA	0	1	0.0916	0.0177	ID_16428	TMEM223	0.0144469	957876	15.4325	59454257401
ID_16429	TMEM223	AT	3	NA	NA	0	1	0.0916	0.0177	ID_16429	TMEM223	0.0144469	1.04e-06	1.68e-11	0.0647985
ID_43496	GALK1	RI	4.2	4.1	4.3	0	1	0.229	0.026	ID_43496	GALK1	0.0144506	2359.31	4.67781	1.18995e+06
ID_60268	ATP5J	ES	1.3:1.4:1.5:2	1.2	3	0	0.9976	0.946	0.1618	ID_60268	ATP5J	0.014456	0.236317	0.0743747	0.750871
ID_12156	PPP3CB	AA	14.1	13	14.2	0	0.9192	0.6881	0.1052	ID_12156	PPP3CB	0.0145257	0.108882	0.0183925	0.644571
ID_27375	CTAGE5	AT	27	NA	NA	0	1	0.0671	0.0087	ID_27375	CTAGE5	0.0145816	12613181227	99.0504	1.60618e+18
ID_27376	CTAGE5	AT	26	NA	NA	0	1	0.0671	0.0087	ID_27376	CTAGE5	0.0145816	7.93e-11	6.23e-19	0.0100959
ID_71271	ING2	AP	NA	NA	NA	0	0.9691	0.8427	0.1833	ID_71271	ING2	0.0145939	4.03248	1.31703	12.3466
ID_71272	ING2	AP	2	NA	NA	0	0.9691	0.8427	0.1833	ID_71272	ING2	0.0145939	0.247986	0.0809939	0.759283
ID_235465	APOC3	ES	3	1	4	1	0.9667	0.8429	0.21	ID_235465	APOC3	0.0145969	3.34105	1.26897	8.79661
ID_58465	FAM110A	AP	2	NA	NA	0	0.8195	0.2603	0.0262	ID_58465	FAM110A	0.0145969	871.91	3.80761	199660
ID_65836	TFG	AD	1.2	1.1	2	0	0.9406	0.4201	0.0741	ID_65836	TFG	0.014609	0.0559168	0.00552437	0.565981
ID_39078	TRAPPC1	RI	1.2	1.1	1.3	0	1	0.4539	0.0811	ID_39078	TRAPPC1	0.0146098	17.117	1.7516	167.271
ID_47666	TMEM205	RI	2.3:2.4:2.5	2.2	2.6	0	1	0.3345	0.0427	ID_47666	TMEM205	0.0146162	84.0528	2.39738	2946.91
ID_38128	CDK10	AD	2.2	2.1	5	0	0.9644	1	0.109	ID_38128	CDK10	0.0146199	0.111955	0.019306	0.649222
ID_69014	TBC1D1	AT	3	NA	NA	0	1	0.7033	0.0996	ID_69014	TBC1D1	0.0146284	0.0961584	0.0146738	0.630132
ID_69013	TBC1D1	AT	23	NA	NA	0	1	0.7033	0.0996	ID_69013	TBC1D1	0.0146316	10.3987	1.58685	68.1431
ID_46575	IZUMO4	AT	4	NA	NA	0	0.9644	0.3748	0.0619	ID_46575	IZUMO4	0.0146325	21.9526	1.83871	262.094
ID_46574	IZUMO4	AT	11	NA	NA	0	0.9644	0.3748	0.0619	ID_46574	IZUMO4	0.0146325	0.0455528	0.00381543	0.543859
ID_50829	NUCB1	AD	2.3	2.2	3	0	0.9952	0.0352	0.0028	ID_50829	NUCB1	0.0146367	2.67e+26	162151	4.4e+47
ID_31850	COMMD4	AA	5.1	4	5.2	0	1	0.1174	0.0169	ID_31850	COMMD4	0.01465	154357	10.5278	2263170098
ID_79605	TNS3	AT	33	NA	NA	0	1	0.0069	0.0003	ID_79605	TNS3	0.0146575	3.59e-157	8.45e-283	1.53e-31
ID_79604	TNS3	AT	15.2	NA	NA	0	1	0.0069	0.0003	ID_79604	TNS3	0.0146575	2.78e+156	6.55e+30	1.18e+282
ID_53234	RMDN2	AT	15	NA	NA	0	1	0.2789	0.0459	ID_53234	RMDN2	0.0146938	0.00963481	0.000231329	0.401287
ID_44118	ACTG1	RI	6.2	6.1	6.3	0	1	0.0023	0.0003	ID_44118	ACTG1	0.0147162	Inf	2.54e+65	Inf
ID_26148	MBNL2	ES	5:6.1:6.2:6.3	4	8	0	0.8955	0.01	0.0008	ID_26148	MBNL2	0.0147279	6.2e-98	4.76e-176	8.09e-20
ID_89765	MORF4L2	AP	NA	NA	NA	0	0.9739	0.8504	0.1047	ID_89765	MORF4L2	0.0147416	0.11271	0.0194994	0.651483
ID_44021	GAA	ES	2.2	1	3	1	0.8551	0.5969	0.1192	ID_44021	GAA	0.0147517	0.168284	0.0401741	0.704916
ID_57392	FN1	AA	40.1	39	40.2	0	1	0.4114	0.0812	ID_57392	FN1	0.0147776	33.5762	1.99118	566.178
ID_13805	CHID1	AP	5.1	NA	NA	0	0.9881	0.3807	0.0603	ID_13805	CHID1	0.0147819	18.0197	1.76234	184.249
ID_28825	CALM1	AD	1.2	1.1	4	0	0.9976	0.0476	0.0071	ID_28825	CALM1	0.0147843	2.90569e+16	1682.69	5.02e+29
ID_63701	SGOL1	AD	6.2	6.1	7	0	0.8527	0.7617	0.1423	ID_63701	SGOL1	0.0148081	5.82997	1.41217	24.0683
ID_69244	OCIAD1	ES	2.2:2.3:2.4:3:4	2.1	6	0	0.8812	1	0.2348	ID_69244	OCIAD1	0.0148109	3.03156	1.24245	7.39693
ID_43247	GPRC5C	AD	3.2:3.3	3.1	4	0	1	0.1267	0.0203	ID_43247	GPRC5C	0.0148308	299210	11.7754	7602888946
ID_55195	BIN1	ES	17	12	18	0	0.9976	0.6086	0.1025	ID_55195	BIN1	0.0148522	0.161439	0.0372199	0.70023
ID_85938	CNTLN	AT	7.3	NA	NA	0	1	0.5619	0.1067	ID_85938	CNTLN	0.0148664	0.0826061	0.0111051	0.614472
ID_85468	TSTA3	AD	1.2	1.1	2	0	0.9952	0.1519	0.0153	ID_85468	TSTA3	0.0148679	115847	9.74695	1376906724
ID_50422	MARK4	ES	2:3:4:5:6:7	1	8	0	0.9905	0.0454	0.0046	ID_50422	MARK4	0.0148991	1.05e-19	5.52e-35	0.000198792
ID_42610	MSI2	AP	2	NA	NA	0	0.9097	0.5329	0.116	ID_42610	MSI2	0.0149173	8.95119	1.53287	52.2705
ID_37478	AP1G1	AP	23.1	NA	NA	0	0.7791	0.7367	0.1081	ID_37478	AP1G1	0.0149232	8.09102	1.50283	43.5608
ID_37479	AP1G1	AP	NA	NA	NA	0	0.7791	0.7367	0.1081	ID_37479	AP1G1	0.0149232	0.123594	0.0229564	0.66541
ID_60903	FTCD	ES	11	10	12	0	0.9715	0.0561	0.0047	ID_60903	FTCD	0.0149283	1.74e-13	9.27e-24	0.00327056
ID_31775	MPI	AT	8	NA	NA	0	1	0.3302	0.0531	ID_31775	MPI	0.0149419	0.0218483	0.0010049	0.475018
ID_52617	ITGB1BP1	AA	8.1:8.2	7	8.3	0	0.9905	0.992	0.2203	ID_52617	ITGB1BP1	0.0149503	0.338504	0.141476	0.809925
ID_37071	ATP6V0D1	ES	6	4	7	0	0.9715	0.0462	0.0066	ID_37071	ATP6V0D1	0.0149592	862096000000	209.9	3.54e+21
ID_26708	ACIN1	ES	4	3	5	0	0.8504	0.8417	0.146	ID_26708	ACIN1	0.014995	0.209139	0.0592764	0.737884
ID_32321	SEC11A	ES	2	1	3	0	0.9857	0.3548	0.0371	ID_32321	SEC11A	0.0150268	195.35	2.78246	13715.1
ID_57659	GLB1L	ES	06:07:00	5	8	0	0.8409	0.8027	0.1294	ID_57659	GLB1L	0.0150272	0.206213	0.0577637	0.736166
ID_70351	ELOVL6	AP	NA	NA	NA	0	0.9311	0.4698	0.0445	ID_70351	ELOVL6	0.0150378	55.2035	2.17669	1400.02
ID_70352	ELOVL6	AP	2.1	NA	NA	0	0.9311	0.4698	0.0445	ID_70352	ELOVL6	0.0150378	0.0181148	0.000714273	0.459413
ID_36234	VKORC1	AA	4.1	2	4.2	0	1	0.1019	0.0153	ID_36234	VKORC1	0.0150668	489197	12.6466	18923196845
ID_7366	FMO5	AP	2.1	NA	NA	0	0.9549	0.3136	0.0386	ID_7366	FMO5	0.0150685	0.00808683	0.00016625	0.393364
ID_7365	FMO5	AP	NA	NA	NA	0	0.9549	0.3136	0.0386	ID_7365	FMO5	0.0150685	123.658	2.54217	6015.04
ID_52751	WDR35	ES	23:24.1:24.2	22.1	25	0	0.7601	0.3273	0.0237	ID_52751	WDR35	0.0150767	0.00430415	5.32e-05	0.348261
ID_19199	HSPA8	ES	4.2:5.2:5.3:6.1	4.1	6.2	0	1	0.0276	0.0035	ID_19199	HSPA8	0.0150782	3.18e-23	2.3e-41	4.41e-05
ID_57393	FN1	AA	40.1:40.2:40.3	39	40.4	0	0.9976	0.8713	0.2016	ID_57393	FN1	0.0151227	3.63194	1.28304	10.281
ID_32419	FANCI	ES	1.2:2:3	1.1	4	0	0.7601	1	0.2665	ID_32419	FANCI	0.0151377	0.419905	0.208487	0.845712
ID_67809	PARL	ES	6	5	7	0	1	0.3582	0.0453	ID_67809	PARL	0.0151421	0.0159215	0.000563819	0.449603
ID_8823	POGK	RI	6.2	6.1	6.3	0	0.9976	0.9037	0.1424	ID_8823	POGK	0.0151425	0.163679	0.037997	0.705076
ID_40526	SYNRG	ES	22	21	23	0	0.9881	0.7496	0.1285	ID_40526	SYNRG	0.0151597	0.197792	0.0534822	0.731486
ID_89777	MORF4L2	ES	4:5.1:5.2	3.2	5.3	0	0.9644	0.6161	0.0778	ID_89777	MORF4L2	0.0151857	13.5909	1.65357	111.706
ID_60707	TMPRSS3	AT	12	NA	NA	0	0.9881	0.8327	0.16	ID_60707	TMPRSS3	0.0151973	0.292304	0.108287	0.789032
ID_60708	TMPRSS3	AT	8.2	NA	NA	0	0.9881	0.8327	0.16	ID_60708	TMPRSS3	0.0151979	3.42107	1.26737	9.23469
ID_25783	TSC22D1	AP	2	NA	NA	0	1	0.1532	0.0185	ID_25783	TSC22D1	0.0151981	4.46e-05	1.37e-08	0.145194
ID_25782	TSC22D1	AP	NA	NA	NA	0	1	0.1532	0.0185	ID_25782	TSC22D1	0.0152025	22397.6	6.88452	7.28669e+07
ID_3687	2019-09-15	ES	5	4	6	0	0.9976	0.4162	0.0491	ID_3687	2019-09-15	0.0152195	0.0267211	0.00143382	0.497983
ID_17234	TMEM134	AA	3.1	2.2	3.2	0	0.8694	0.7357	0.128	ID_17234	TMEM134	0.0152359	0.173871	0.0423242	0.714273
ID_61192	CRKL	RI	3.2	3.1	3.3	0	1	0.0702	0.0085	ID_61192	CRKL	0.0152567	9.75e-10	5.13e-17	0.0185493
ID_55139	TMEM177	AD	1.2	1.1	2.1	0	0.9549	1	0.1427	ID_55139	TMEM177	0.0152712	5.05812	1.36524	18.74
ID_50964	FCGRT	ES	4	3	7	0	1	0.0415	0.005	ID_50964	FCGRT	0.0152783	6.15e-17	4.91e-30	0.000771652
ID_3820	SLC44A3	AD	5.2	5.1	6	0	0.8005	0.5111	0.0962	ID_3820	SLC44A3	0.015281	0.0653752	0.00721519	0.59235
ID_10861	RPP38	AT	5	NA	NA	0	1	0.5221	0.0829	ID_10861	RPP38	0.0152847	0.0651048	0.00716075	0.591925
ID_10860	RPP38	AT	3.2	NA	NA	0	1	0.5221	0.0829	ID_10860	RPP38	0.0152884	15.3581	1.68923	139.632
ID_85920	PSIP1	AT	11.2	NA	NA	0	1	0.7891	0.0897	ID_85920	PSIP1	0.0152902	9.62857	1.54439	60.0298
ID_85919	PSIP1	AT	17	NA	NA	0	1	0.7891	0.0897	ID_85919	PSIP1	0.0152925	0.103863	0.0166594	0.647539
ID_45707	BCL2	AT	1.4	NA	NA	0	1	0.8401	0.1253	ID_45707	BCL2	0.0153063	4.43567	1.33069	14.7857
ID_81536	CAV1	AD	1.2:1.3	1.1	2.3	0	0.8147	0.7073	0.0973	ID_81536	CAV1	0.0153064	6.97351	1.45131	33.5076
ID_45706	BCL2	AT	2	NA	NA	0	1	0.8401	0.1253	ID_45706	BCL2	0.0153086	0.225452	0.0676349	0.751516
ID_72373	MARVELD2	ES	3	2.4	4	0	0.905	0.3196	0.0572	ID_72373	MARVELD2	0.0153498	0.0198086	0.000831303	0.472008
ID_69601	FAM47E	AT	11	NA	NA	0	1	0.4827	0.0761	ID_69601	FAM47E	0.0153522	15.3538	1.68681	139.755
ID_69602	FAM47E	AT	10	NA	NA	0	1	0.4827	0.0761	ID_69602	FAM47E	0.0153563	0.0651375	0.00715619	0.592899
ID_8810	TMCO1	AD	4.2	4.1	5	0	0.9929	0.0813	0.0126	ID_8810	TMCO1	0.0153567	5.4e-08	7.18e-14	0.0406557
ID_85085	TATDN1	AD	4.2	4.1	5	0	0.9786	0.5543	0.1005	ID_85085	TATDN1	0.0153643	9.39404	1.53508	57.4874
ID_291	FAM213B	ES	5:6.1:6.2	4.2	6.3	0	0.9264	0.0318	0.0018	ID_291	FAM213B	0.0153813	6.95e-29	1.17e-51	4.13e-06
ID_31891	UBE2Q2	ES	11:12:13	10	14	0	0.9335	0.2581	0.0411	ID_31891	UBE2Q2	0.0154093	0.00535696	7.79e-05	0.368374
ID_68270	NCBP2	AD	1.2:1.3:1.4	1.1	3.1	0	0.9881	0.5137	0.093	ID_68270	NCBP2	0.0154164	0.0788412	0.0100956	0.615706
ID_52575	RPS7	AD	1.2	1.1	2.2	1	0.8266	0.4529	0.0874	ID_52575	RPS7	0.0154248	0.0269802	0.00145052	0.50184
ID_3381	SRSF11	RI	6.2	6.1	6.3	0	0.9264	0.6055	0.0588	ID_3381	SRSF11	0.0154307	0.0409173	0.00308082	0.543436
ID_57477	CTDSP1	AP	NA	NA	NA	0	0.9667	0.2468	0.0252	ID_57477	CTDSP1	0.0154487	525.857	3.30191	83747.1
ID_57476	CTDSP1	AP	2	NA	NA	0	0.9667	0.2468	0.0252	ID_57476	CTDSP1	0.0154487	0.00190166	1.19e-05	0.302855
ID_47975	DDX39A	AA	7.1	6	7.2	0	1	0.5648	0.0789	ID_47975	DDX39A	0.0154537	0.0470347	0.00396189	0.558386
ID_16618	GPR137	AP	4.1	NA	NA	0	0.9715	0.8567	0.1184	ID_16618	GPR137	0.0154819	7.2926	1.4598	36.431
ID_15476	EXT2	AP	NA	NA	NA	0	0.829	0.3879	0.0773	ID_15476	EXT2	0.0154823	0.0490279	0.00426799	0.563201
ID_15477	EXT2	AP	2	NA	NA	0	0.829	0.3879	0.0773	ID_15477	EXT2	0.0154823	20.3965	1.77556	234.302
ID_38159	TCF25	ES	18	17	19	0	1	0.4561	0.0736	ID_38159	TCF25	0.0155055	0.0527448	0.00486878	0.571398
ID_7317	GPR89A	ES	3	1	4	0	0.8907	0.4578	0.0801	ID_7317	GPR89A	0.015554	0.0270877	0.00145566	0.504063
ID_51812	RPS9	AP	NA	NA	NA	0	1	0.0462	0.0083	ID_51812	RPS9	0.0156112	3.33e-11	1.07e-19	0.0103689
ID_49603	YIF1B	AP	NA	NA	NA	0	0.9857	0.8988	0.182	ID_49603	YIF1B	0.0156256	0.280499	0.100082	0.786153
ID_51811	RPS9	AP	2.1	NA	NA	0	1	0.0462	0.0083	ID_51811	RPS9	0.0156341	29855231742	95.9323	9.29129e+18
ID_29021	ITPK1	AA	11.1	10	11.2	0	1	0.0216	0.0031	ID_29021	ITPK1	0.0156446	2.54e-28	1.07e-50	6.04e-06
ID_8887	DCAF6	ES	13.1	10	14	0	0.9572	0.7805	0.1103	ID_8887	DCAF6	0.0156468	0.10212	0.0160548	0.649551
ID_62404	XPNPEP3	AT	18	NA	NA	0	1	0.2337	0.0314	ID_62404	XPNPEP3	0.0156747	1143.2	3.78142	345615
ID_99315	AFMID	ES	8:9:10:11.1:11.2:12	6	13	1	0.9715	0.8657	0.1506	ID_99315	AFMID	0.0156961	0.20803	0.058202	0.743555
ID_99319	AFMID	ES	08:12:00	6	13	1	0.9715	0.9105	0.2438	ID_99319	AFMID	0.0157051	2.84369	1.21794	6.63955
ID_79099	SCRN1	AT	11	NA	NA	0	1	0.0528	0.003	ID_79099	SCRN1	0.0157076	4.5e-21	1.39e-37	0.000145143
ID_79100	SCRN1	AT	6	NA	NA	0	1	0.0528	0.003	ID_79100	SCRN1	0.0157076	2.22e+20	6889.75	7.18e+36
ID_43512	UNC13D	RI	32.2	32.1	32.3	0	0.9905	0.216	0.0251	ID_43512	UNC13D	0.0157086	0.000797426	2.44e-06	0.260359
ID_9188	NCF2	ES	05:06:00	4	7	0	0.8432	0.0496	0.0044	ID_9188	NCF2	0.0157877	1.77e-15	1.86e-27	0.00168446
ID_12699	RRP12	ES	00:04:05.200000	3	6	0	0.8884	0.1279	0.0119	ID_12699	RRP12	0.0158044	4.98e-07	3.79e-12	0.0654307
ID_37680	WWOX	ES	5:7:8:9	4	13	0	0.9549	0.1211	0.0125	ID_37680	WWOX	0.0158132	2.41e-07	1.02e-12	0.0571539
ID_52921	MAPRE3	AD	5.2	5.1	6	0	0.9596	0.5733	0.107	ID_52921	MAPRE3	0.0158402	8.90717	1.50722	52.6384
ID_44046	RNF213	AT	69	NA	NA	0	1	0.401	0.0595	ID_44046	RNF213	0.0158566	0.0273391	0.0014677	0.50925
ID_10475	COX20	ES	3	1	4	1	1	0.6598	0.1218	ID_10475	COX20	0.0158652	6.79242	1.43196	32.2195
ID_65419	FLNB	ES	32.1	31	33	0	0.7815	1	0.2387	ID_65419	FLNB	0.0158693	0.37122	0.165923	0.830534
ID_82417	ACTR3B	ES	10:11:00	9	12	0	0.9976	0.1513	0.0301	ID_82417	ACTR3B	0.0159267	0.00081121	2.49e-06	0.264365
ID_12493	PANK1	AP	NA	NA	NA	0	0.9644	0.9765	0.1775	ID_12493	PANK1	0.0159613	2.90937	1.22061	6.93458
ID_12494	PANK1	AP	2	NA	NA	0	0.9644	0.9765	0.1775	ID_12494	PANK1	0.0159671	0.343735	0.144211	0.81931
ID_77955	REPS1	AD	9.2:9.3	9.1	10	0	0.848	0.0852	0.01	ID_77955	REPS1	0.0159731	1.53e-16	2.08e-29	0.00111952
ID_54060	INO80B	AT	8	NA	NA	0	1	0.4552	0.0521	ID_54060	INO80B	0.0159866	0.0204811	0.000866156	0.484296
ID_68380	MYL5	AP	NA	NA	NA	0	0.9952	0.8222	0.2052	ID_68380	MYL5	0.0159907	2.92148	1.22126	6.98871
ID_68382	MYL5	AP	3	NA	NA	0	0.9952	0.8222	0.2052	ID_68382	MYL5	0.0159951	0.342308	0.143095	0.818864
ID_54061	INO80B	AT	5.4	NA	NA	0	1	0.4552	0.0521	ID_54061	INO80B	0.0159962	48.811	2.06414	1154.24
ID_58381	FARP2	AT	28	NA	NA	0	0.9929	0.9213	0.1962	ID_58381	FARP2	0.0160004	0.322054	0.128104	0.809643
ID_58380	FARP2	AT	18.2	NA	NA	0	0.9929	0.9213	0.1962	ID_58380	FARP2	0.0160037	3.10497	1.23507	7.80591
ID_69087	RBM47	AP	5	NA	NA	0	0.8147	0.7547	0.1303	ID_69087	RBM47	0.0160303	0.120149	0.0214161	0.674065
ID_72697	TMEM167A	ES	2	1	3	1	0.9074	0.307	0.0378	ID_72697	TMEM167A	0.0160572	826.148	3.48634	195770
ID_24709	PRKAB1	ES	3	1.3	4	0	0.9881	0.947	0.25	ID_24709	PRKAB1	0.0160721	0.344601	0.144746	0.8204
ID_67056	ACPL2	AP	8	NA	NA	0	0.9216	0.9787	0.2734	ID_67056	ACPL2	0.0160751	0.416947	0.204526	0.84999
ID_86273	ARHGEF39	RI	11.2	11.1	11.3	0	0.9905	0.441	0.0595	ID_86273	ARHGEF39	0.0160773	173.932	2.60741	11602.5
[truncated: 1,815 more rows]
