# Supplementary material for: Alternative splicing events are prognostic in hepatocellular carcinoma
Source: Aging (Albany NY). 2019 Jul 13;11(13):4720–35. doi: 10.18632/aging.102085 (PMC6660027; doi:10.18632/aging.102085)
Supplement: Supplementary Table 2 [file aging-11-102085-s001.xlsx]

## Sheet: LIHC_spearman_matrix
LIHC_AS_PSI_ID	LIHC_AS_PSI_name	LIHC_exp_SF_name	LIHC_cor_Pvalue	LIHC_cor_rho	cor	Prognosis
ID_25012	OGFOD2	HNRNPA0	0.000102629	0.226029	1	-1
ID_862	ARHGEF10L	TIAL1	0.000103133	-0.232803	-1	1
ID_88297	EXD3	QKI	0.000103483	-0.224253	-1	1
ID_8451	DCAF8	SRSF6	0.000109018	0.252323	1	-1
ID_25012	OGFOD2	HNRNPA1	0.000111301	0.224951	1	-1
ID_68075	MASP1	SRP54	0.000121471	0.222586	1	1
ID_85437	EEF1D	HNRNPA1	0.000123347	0.222057	1	-1
ID_39434	UBB	NOVA1	0.000123543	0.22201	1	-1
ID_25012	OGFOD2	HNRNPH2	0.000126355	0.223318	1	-1
ID_52102	RPL28	CELF1	0.000127326	0.221595	1	-1
ID_62619	PRR5	HNRNPA1	0.000127982	-0.222143	-1	1
ID_80899	TAF6	SRSF6	0.000133015	0.237191	1	-1
ID_89926	PLS3	SRSF6	0.000137254	0.220612	1	1
ID_82807	SLC7A2	HNRNPH2	0.000137458	0.253582	1	-1
ID_8451	DCAF8	HNRNPDL	0.000141334	0.24851	1	-1
ID_85437	EEF1D	HNRNPA0	0.000141569	0.220158	1	-1
ID_42832	RPS6KB1	KHSRP	0.000145952	-0.219764	-1	-1
ID_52929	KHK	NOVA1	0.000156533	0.219204	1	-1
ID_24640	SLC8B1	RBM5	0.000160859	-0.224058	-1	1
ID_61101	COMT	ELAVL1	0.000162756	0.218363	1	-1
ID_24640	SLC8B1	QKI	0.000168291	-0.223412	-1	1
ID_33383	IL32	QKI	0.000168291	0.21822	1	-1
ID_80899	TAF6	TIAL1	0.000175113	0.233315	1	-1
ID_52102	RPL28	ELAVL1	0.000179832	0.217039	1	-1
ID_78753	ZDHHC4	HNRNPH2	0.000188219	0.225002	1	-1
ID_52102	RPL28	TIA1	0.000196626	0.215891	1	-1
ID_30895	LIPC	NOVA1	0.000209616	0.21598	1	-1
ID_30894	LIPC	NOVA1	0.000209616	-0.215987	-1	-1
ID_89926	PLS3	TIA1	0.000210967	0.214943	1	1
ID_52102	RPL28	NOVA1	0.000211498	0.214885	1	-1
ID_862	ARHGEF10L	SRSF6	0.000217109	-0.222638	-1	1
ID_17233	TMEM134	TIAL1	0.000217109	0.214521	1	-1
ID_25012	OGFOD2	RBM5	0.000219797	0.215882	1	-1
ID_89926	PLS3	KHSRP	0.00022833	0.21383	1	1
ID_55030	IL1RN	HNRNPH3	0.000237239	-0.225639	-1	1
ID_89926	PLS3	RBMX	0.000249671	0.212641	1	1
ID_74649	NOP16	QKI	0.000249671	0.212638	1	-1
ID_85610	VPS28	TIAL1	0.000249929	0.212598	1	-1
ID_78753	ZDHHC4	CELF1	0.000251151	0.220911	1	-1
ID_85610	VPS28	CELF1	0.000263688	0.211875	1	-1
ID_16408	BSCL2	SRP54	0.000269846	0.224838	1	-1
ID_61101	COMT	NOVA1	0.000269846	0.211532	1	-1
ID_89926	PLS3	RBM5	0.000273097	0.211355	1	1
ID_82807	SLC7A2	SF3B1	0.000282122	0.242578	1	-1
ID_17481	IL18BP	RBM25	0.000296168	0.235666	1	-1
ID_25012	OGFOD2	KHSRP	0.00030033	0.211603	1	-1
ID_52102	RPL28	HNRNPH3	0.000302076	0.209979	1	-1
ID_52102	RPL28	SRP54	0.000305894	0.209794	1	-1
ID_24640	SLC8B1	SF3B1	0.000306139	-0.215045	-1	1
ID_306194	GTF2H3	HNRNPH2	0.000306139	0.221141	1	-1
ID_88297	EXD3	HNRNPH2	0.000316512	-0.209283	-1	1
ID_26334	F7	CELF1	0.000318111	0.21883	1	-1
ID_862	ARHGEF10L	PSMD4	0.000323761	-0.216873	-1	1
ID_25012	OGFOD2	SF3B1	0.000324154	0.210417	1	-1
ID_55030	IL1RN	HNRNPD	0.000328019	-0.220756	-1	1
ID_8451	DCAF8	RBM5	0.000328019	0.23561	1	-1
ID_82807	SLC7A2	SRSF6	0.000329325	0.239953	1	-1
ID_70898	PLRG1	SRRM1	0.000341351	-0.215374	-1	-1
ID_42832	RPS6KB1	RBMX	0.000345729	-0.20795	-1	-1
ID_8282	IQGAP3	HNRNPA0	0.000346034	-0.208212	-1	-1
ID_43804	AFMID	KHSRP	0.000346621	-0.207865	-1	1
ID_25012	OGFOD2	SRRM1	0.000390836	0.207799	1	-1
ID_55030	IL1RN	RBM25	0.000401215	-0.217844	-1	1
ID_70898	PLRG1	SF3B1	0.000409499	-0.212751	-1	-1
ID_85610	VPS28	SF3B1	0.000409499	0.205616	1	-1
ID_24640	SLC8B1	TIA1	0.000409499	-0.21081	-1	1
ID_42832	RPS6KB1	HNRNPH1	0.000421385	-0.205201	-1	-1
ID_78753	ZDHHC4	SRP54	0.000424365	0.213204	1	-1
ID_25012	OGFOD2	HNRNPD	0.000440957	0.206047	1	-1
ID_55030	IL1RN	HNRNPA1	0.00044443	-0.216257	-1	1
ID_62619	PRR5	KHSRP	0.000445145	-0.204972	-1	1
ID_45699	KIAA1468	RBMX	0.000445145	0.216879	1	-1
ID_52102	RPL28	HNRNPD	0.000469532	0.203641	1	-1
ID_70898	PLRG1	HNRNPH2	0.000493212	-0.210038	-1	-1
ID_17481	IL18BP	RBM5	0.000498196	0.227347	1	-1
ID_37707	CMC2	SRP54	0.000511763	0.215897	1	-1
ID_70898	PLRG1	HNRNPH3	0.000536308	-0.208797	-1	-1
ID_45699	KIAA1468	RBM25	0.000536308	0.214165	1	-1
ID_53682	PEX13	SRRM1	0.000541473	0.201543	1	-1
ID_53681	PEX13	SRRM1	0.000541473	-0.201543	-1	1
ID_53682	PEX13	NOVA1	0.000541473	0.201569	1	-1
ID_53681	PEX13	NOVA1	0.000541473	-0.201569	-1	1
ID_12281	KCNMA1	HNRNPA0	0.000566103	-0.202393	-1	1
ID_16919	CFL1	TIAL1	0.000604327	0.203285	1	-1
ID_8451	DCAF8	CELF1	0.000605833	0.225828	1	-1
ID_53682	PEX13	QKI	0.000614531	0.199743	1	-1
ID_53681	PEX13	QKI	0.000614531	-0.199743	-1	1
ID_80899	TAF6	CELF1	0.000621809	0.214243	1	-1
ID_53682	PEX13	CELF1	0.000643359	0.199057	1	-1
ID_53681	PEX13	CELF1	0.000643359	-0.199057	-1	1
ID_8282	IQGAP3	PSMD4	0.000660536	-0.198967	-1	-1
ID_10823	FAM107B	RBMX	0.000668981	-0.219367	-1	1
ID_8610	APOA2	QKI	0.000673713	0.198365	1	-1
ID_61101	COMT	CELF1	0.000681235	0.198166	1	-1
ID_50996	IRF3	PSMD4	0.000681235	-0.198173	-1	-1
ID_8282	IQGAP3	HNRNPH1	0.000724696	-0.197596	-1	-1
ID_24640	SLC8B1	RBM25	0.000744667	-0.201925	-1	1
ID_17233	TMEM134	CELF1	0.000753237	0.196741	1	-1
ID_88297	EXD3	CELF1	0.000762776	-0.196546	-1	1
ID_74394	CLINT1	HNRNPH3	0.000782184	0.201168	1	-1
ID_42832	RPS6KB1	SRSF6	0.000850772	-0.195019	-1	-1
ID_25012	OGFOD2	HNRNPH1	0.000864406	0.196195	1	-1
ID_12281	KCNMA1	NOVA1	0.000869853	-0.196083	-1	1
ID_117545	NOP16	SRRM1	0.000899214	0.215018	1	-1
ID_24518	ATXN2	PSMD4	0.000920494	-0.198772	-1	1
ID_70898	PLRG1	QKI	0.000926976	-0.200478	-1	-1
ID_12279	KCNMA1	HNRNPA0	0.000953792	0.194714	1	-1
ID_84527	FAM92A1	HNRNPH3	0.000973405	0.22296	1	-1
ID_89926	PLS3	ELAVL1	0.000978538	0.192904	1	1
ID_85610	VPS28	SRSF6	0.00101418	0.192388	1	-1
ID_117545	NOP16	SF3B1	0.00103008	0.212768	1	-1
ID_25012	OGFOD2	ELAVL1	0.00103632	0.193438	1	-1
ID_85437	EEF1D	TIAL1	0.00107812	0.191468	1	-1
ID_55030	IL1RN	TIA1	0.00108034	-0.202517	-1	1
ID_82807	SLC7A2	HNRNPH3	0.0011006	0.219968	1	-1
ID_8451	DCAF8	SRRM1	0.00110159	0.215844	1	-1
ID_45699	KIAA1468	HNRNPH1	0.00118839	0.201693	1	-1
ID_24640	SLC8B1	SRSF6	0.00121594	-0.194497	-1	1
ID_25012	OGFOD2	RBM25	0.00122906	0.190877	1	-1
ID_88297	EXD3	TIAL1	0.0012588	-0.189136	-1	1
ID_45699	KIAA1468	TIA1	0.00128011	0.200461	1	-1
ID_117545	NOP16	CELF1	0.00128011	0.209133	1	-1
ID_55030	IL1RN	SF3B1	0.00134004	-0.199107	-1	1
ID_10823	FAM107B	HNRNPA0	0.00135334	-0.20782	-1	1
ID_52102	RPL28	HNRNPH2	0.00135334	0.188008	1	-1
ID_8451	DCAF8	TIAL1	0.00137827	0.212043	1	-1
ID_8451	DCAF8	SLU7	0.00138834	0.211899	1	-1
ID_55030	IL1RN	ELAVL1	0.00141474	-0.198151	-1	1
ID_82807	SLC7A2	RBM5	0.00141474	0.215548	1	-1
ID_74649	NOP16	SF3B1	0.00144419	0.186951	1	-1
ID_68075	MASP1	CELF1	0.00145445	0.187095	1	1
ID_16408	BSCL2	NOVA1	0.00151029	0.198045	1	-1
ID_17481	IL18BP	CELF1	0.00152098	0.208746	1	-1
ID_52102	RPL28	KHSRP	0.00152142	0.186112	1	-1
ID_203434	PKM	HNRNPH1	0.0015586	-0.185725	-1	1
ID_45699	KIAA1468	HNRNPA0	0.0015586	0.197142	1	-1
ID_55030	IL1RN	RBM5	0.00160167	-0.196068	-1	1
ID_12279	KCNMA1	NOVA1	0.00161764	0.186488	1	-1
ID_18676	PPP2R1B	PSMD4	0.00162358	-0.188633	-1	-1
ID_203434	PKM	HNRNPD	0.00162555	-0.184997	-1	1
ID_17707	RAB6A	NOVA1	0.00162555	0.190283	1	-1
ID_306194	GTF2H3	SLU7	0.00164443	0.194909	1	-1
ID_17481	IL18BP	SRSF6	0.00164905	0.20718	1	-1
ID_12281	KCNMA1	HNRNPH1	0.00167463	-0.185838	-1	1
ID_37707	CMC2	KHSRP	0.00167655	0.19674	1	-1
ID_10823	FAM107B	HNRNPA1	0.00167655	-0.203893	-1	1
ID_84527	FAM92A1	RBM5	0.00167748	0.213076	1	-1
ID_42832	RPS6KB1	ELAVL1	0.00168162	-0.184333	-1	-1
ID_26334	F7	NOVA1	0.00168423	0.192823	1	-1
ID_42832	RPS6KB1	HNRNPA0	0.00168502	-0.184255	-1	-1
ID_42832	RPS6KB1	TIAL1	0.00168958	-0.184191	-1	-1
ID_53682	PEX13	SRSF6	0.00169273	0.184115	1	-1
ID_53681	PEX13	SRSF6	0.00169273	-0.184115	-1	1
ID_43804	AFMID	RBM5	0.00169343	-0.184084	-1	1
ID_25012	OGFOD2	HNRNPH3	0.0017897	0.184577	1	-1
ID_42832	RPS6KB1	HNRNPD	0.0017897	-0.18324	-1	-1
ID_78753	ZDHHC4	SRRM1	0.00187616	0.189798	1	-1
ID_42832	RPS6KB1	RBM25	0.00189537	-0.182363	-1	-1
ID_45699	KIAA1468	SRSF6	0.00195551	0.193082	1	-1
ID_25012	OGFOD2	CELF1	0.00198449	0.182973	1	-1
ID_55030	IL1RN	RBMX	0.00199904	-0.192041	-1	1
ID_42832	RPS6KB1	HNRNPA1	0.00199904	-0.181506	-1	-1
ID_62619	PRR5	NOVA1	0.00200274	-0.181966	-1	1
ID_55030	IL1RN	QKI	0.00205845	-0.191539	-1	1
ID_16919	CFL1	SRP54	0.0020931	0.18369	1	-1
ID_862	ARHGEF10L	QKI	0.00218691	-0.18696	-1	1
ID_82807	SLC7A2	QKI	0.00220331	0.207171	1	-1
ID_82807	SLC7A2	ELAVL1	0.00220793	0.207108	1	-1
ID_25012	OGFOD2	HNRNPDL	0.0022295	0.181038	1	-1
ID_117545	NOP16	NOVA1	0.00224894	0.1989	1	-1
ID_88297	EXD3	SRP54	0.00238995	-0.178655	-1	1
ID_25012	OGFOD2	TIAL1	0.00242101	0.179693	1	-1
ID_53554	GPR75-ASB3	PSMD4	0.00242101	0.196562	1	-1
ID_53555	GPR75-ASB3	PSMD4	0.00242101	-0.196562	-1	1
ID_62619	PRR5	HNRNPD	0.00243508	-0.178798	-1	1
ID_62619	PRR5	RBMX	0.00244106	-0.178737	-1	1
ID_24640	SLC8B1	HNRNPD	0.00246945	-0.182565	-1	1
ID_117545	NOP16	HNRNPH3	0.00252526	0.196797	1	-1
ID_52102	RPL28	HNRNPDL	0.00257027	0.177382	1	-1
ID_42832	RPS6KB1	SF3B1	0.0026395	-0.176962	-1	-1
ID_17481	IL18BP	HNRNPH3	0.00267245	0.198263	1	-1
ID_17481	IL18BP	KHSRP	0.00267711	0.198207	1	-1
ID_43804	AFMID	ELAVL1	0.00282716	-0.175863	-1	1
ID_24640	SLC8B1	HNRNPA1	0.00282716	-0.180326	-1	1
ID_15770	PTPMT1	KHSRP	0.00289401	0.175464	1	-1
ID_55030	IL1RN	HNRNPA0	0.00291353	-0.185541	-1	1
ID_117545	NOP16	HNRNPA0	0.00291353	0.1942	1	-1
ID_70898	PLRG1	KHSRP	0.00292177	-0.181382	-1	-1
ID_203434	PKM	HNRNPH3	0.00295454	-0.175056	-1	1
ID_43804	AFMID	PSMD4	0.00302414	-0.174681	-1	1
ID_16624	GPR137	KHSRP	0.00303039	-0.174625	-1	1
ID_45699	KIAA1468	HNRNPH2	0.00308309	0.18509	1	-1
ID_42832	RPS6KB1	HNRNPH2	0.00314233	-0.174029	-1	-1
ID_16919	CFL1	NOVA1	0.00331494	0.176018	1	-1
ID_33383	IL32	SRP54	0.00340009	0.173035	1	-1
ID_117545	NOP16	HNRNPH2	0.00344078	0.191181	1	-1
ID_52102	RPL28	RBM5	0.00354181	0.172114	1	-1
ID_89926	PLS3	HNRNPDL	0.00393426	0.170477	1	1
ID_45804	CYB5A	SRSF6	0.00403153	-0.170051	-1	-1
ID_45803	CYB5A	SRSF6	0.00403153	0.170051	1	-1
ID_12279	KCNMA1	HNRNPH1	0.00406114	0.171157	1	-1
ID_16624	GPR137	RBMX	0.00423213	-0.169251	-1	1
ID_74856	PHYKPL	KHSRP	0.00427887	-0.169547	-1	-1
ID_8282	IQGAP3	SRSF6	0.00432131	-0.169098	-1	-1
ID_50360	APOC1	QKI	0.00432131	0.168877	1	-1
ID_80899	TAF6	SRRM1	0.00440886	0.180997	1	-1
ID_70898	PLRG1	RBM25	0.00442887	-0.174319	-1	-1
ID_42832	RPS6KB1	TIA1	0.00442887	-0.168397	-1	-1
ID_8282	IQGAP3	HNRNPA1	0.00444993	-0.168543	-1	-1
ID_33383	IL32	PSMD4	0.00454272	0.168196	1	-1
ID_8282	IQGAP3	HNRNPH3	0.00459053	-0.167983	-1	-1
ID_52102	RPL28	TIAL1	0.00459053	0.167752	1	-1
ID_39181	RPL26	KHSRP	0.00460412	0.167669	1	-1
ID_37707	CMC2	SF3B1	0.00475635	0.178329	1	-1
ID_62619	PRR5	TIAL1	0.0049248	-0.167048	-1	1
ID_85610	VPS28	QKI	0.00494052	0.166465	1	-1
ID_203434	PKM	TIA1	0.00494052	-0.166469	-1	1
ID_78753	ZDHHC4	NOVA1	0.0050012	0.172884	1	-1
ID_117545	NOP16	RBMX	0.00505172	0.183988	1	-1
ID_42832	RPS6KB1	SRP54	0.00509698	-0.1659	-1	-1
ID_12281	KCNMA1	HNRNPH3	0.00514015	-0.166955	-1	1
ID_61101	COMT	SRRM1	0.0052781	0.165299	1	-1
ID_117545	NOP16	HNRNPH1	0.00536088	0.182815	1	-1
ID_24640	SLC8B1	NOVA1	0.00536088	-0.16924	-1	1
ID_29057	IFI27L1	PSMD4	0.00542027	-0.165525	-1	1
ID_70898	PLRG1	HNRNPA1	0.00558018	-0.17008	-1	-1
ID_42832	RPS6KB1	RBM5	0.00564834	-0.164099	-1	-1
ID_42832	RPS6KB1	HNRNPDL	0.00580773	-0.16363	-1	-1
ID_70898	PLRG1	HNRNPD	0.00588834	-0.169117	-1	-1
ID_24640	SLC8B1	HNRNPH2	0.00592153	-0.167447	-1	1
ID_17481	IL18BP	ELAVL1	0.00601559	0.182887	1	-1
ID_8282	IQGAP3	RBMX	0.00606353	-0.163078	-1	-1
ID_43804	AFMID	TIA1	0.00608102	-0.162771	-1	1
ID_74649	NOP16	SRP54	0.00610971	0.162671	1	-1
ID_37707	CMC2	SRSF6	0.0061306	0.173492	1	-1
ID_862	ARHGEF10L	SRRM1	0.0061633	-0.168708	-1	1
ID_74856	PHYKPL	PSMD4	0.00629209	-0.162597	-1	-1
ID_862	ARHGEF10L	NOVA1	0.00632722	-0.168219	-1	1
ID_52102	RPL28	RBMX	0.00636851	0.161882	1	-1
ID_203434	PKM	SF3B1	0.00641022	-0.161752	-1	1
ID_29057	IFI27L1	HNRNPH1	0.00644064	-0.162359	-1	1
ID_55030	IL1RN	KHSRP	0.00662529	-0.170575	-1	1
ID_70898	PLRG1	HNRNPDL	0.00699704	-0.165883	-1	-1
ID_74394	CLINT1	RBM25	0.00700108	0.164324	1	-1
ID_42832	RPS6KB1	HNRNPH3	0.00709517	-0.159982	-1	-1
ID_37707	CMC2	ELAVL1	0.00710431	0.170663	1	-1
ID_26334	F7	PSMD4	0.00714152	0.167266	1	-1
ID_84527	FAM92A1	SRRM1	0.00714414	0.18479	1	-1
ID_68075	MASP1	HNRNPD	0.0072637	-0.159733	-1	1
ID_78753	ZDHHC4	SLU7	0.00745482	0.165408	1	-1
ID_89926	PLS3	HNRNPH1	0.00760863	0.158692	1	1
ID_12281	KCNMA1	RBMX	0.00767558	-0.159686	-1	1
ID_68075	MASP1	HNRNPH2	0.00807355	0.157895	1	1
ID_8610	APOA2	SRP54	0.00807429	0.15764	1	-1
ID_61101	COMT	QKI	0.00842975	0.156902	1	-1
ID_45699	KIAA1468	RBM5	0.0084974	0.166441	1	-1
ID_24640	SLC8B1	HNRNPDL	0.00855781	-0.160612	-1	1
ID_88297	EXD3	SRRM1	0.00863121	-0.156405	-1	1
ID_39181	RPL26	RBM25	0.00863121	0.156388	1	-1
ID_85610	VPS28	NOVA1	0.00863121	0.156413	1	-1
ID_45699	KIAA1468	SLU7	0.00878046	0.165734	1	-1
ID_45699	KIAA1468	HNRNPDL	0.00895871	0.165352	1	-1
ID_37707	CMC2	RBMX	0.00905994	0.165943	1	-1
ID_53682	PEX13	SLU7	0.00910263	0.155378	1	-1
ID_53681	PEX13	SLU7	0.00910263	-0.155378	-1	1
ID_26334	F7	SRRM1	0.00911869	0.16256	1	-1
ID_52102	RPL28	HNRNPA0	0.00924732	0.155066	1	-1
ID_12279	KCNMA1	HNRNPH3	0.0101547	0.154589	1	-1
ID_39180	RPL26	SRP54	0.0102409	0.153296	1	-1
ID_52929	KHK	QKI	0.0102639	0.153456	1	-1
ID_12281	KCNMA1	RBM25	0.0103868	-0.154129	-1	1
ID_84527	FAM92A1	HNRNPDL	0.0106345	0.176481	1	-1
ID_117545	NOP16	TIA1	0.0107193	0.168916	1	-1
ID_8451	DCAF8	QKI	0.0107846	0.172184	1	-1
ID_12281	KCNMA1	QKI	0.0111691	-0.152785	-1	1
ID_12281	KCNMA1	ELAVL1	0.0115749	-0.152144	-1	1
ID_37707	CMC2	QKI	0.0117652	0.160856	1	-1
ID_84527	FAM92A1	TIAL1	0.0118204	0.1742	1	-1
ID_39180	RPL26	NOVA1	0.0118204	0.150624	1	-1
ID_84527	FAM92A1	TIA1	0.0118398	0.174139	1	-1
ID_42832	RPS6KB1	CELF1	0.0119179	-0.150411	-1	-1
ID_89926	PLS3	NOVA1	0.0121613	0.150038	1	1
ID_203434	PKM	HNRNPDL	0.0122486	-0.14989	-1	1
ID_45699	KIAA1468	NOVA1	0.0125207	0.158744	1	-1
ID_17481	IL18BP	SF3B1	0.0128502	0.167246	1	-1
ID_62619	PRR5	PSMD4	0.0129705	-0.149258	-1	1
ID_25012	OGFOD2	SRSF6	0.0131272	0.149681	1	-1
ID_37707	CMC2	HNRNPH1	0.013169	0.158471	1	-1
ID_39181	RPL26	TIA1	0.013169	0.148486	1	-1
ID_39181	RPL26	SRP54	0.0132544	0.148349	1	-1
ID_862	ARHGEF10L	CELF1	0.0135568	-0.153613	-1	1
ID_117545	NOP16	QKI	0.0140793	0.163192	1	-1
ID_53554	GPR75-ASB3	HNRNPD	0.0141571	0.162165	1	-1
ID_53555	GPR75-ASB3	HNRNPD	0.0141571	-0.162165	-1	1
ID_52102	RPL28	SLU7	0.0142692	0.146935	1	-1
ID_82341	FASTK	RBM5	0.0144455	-0.147122	-1	-1
ID_117545	NOP16	SRSF6	0.0145046	0.162478	1	-1
ID_84527	FAM92A1	RBMX	0.0145324	0.169519	1	-1
ID_62619	PRR5	TIA1	0.0145692	-0.146898	-1	1
ID_117545	NOP16	TIAL1	0.0145964	0.162274	1	-1
ID_12279	KCNMA1	RBMX	0.0146383	0.147413	1	-1
ID_117545	NOP16	RBM25	0.0150629	0.161606	1	-1
ID_70898	PLRG1	SRP54	0.0151454	-0.150814	-1	-1
ID_68075	MASP1	SRRM1	0.0152564	0.145746	1	1
ID_24640	SLC8B1	SLU7	0.0159656	-0.148414	-1	1
ID_74856	PHYKPL	HNRNPA1	0.0160599	-0.144994	-1	-1
ID_37707	CMC2	RBM25	0.0162869	0.154001	1	-1
ID_8610	APOA2	NOVA1	0.016433	0.144113	1	-1
ID_37707	CMC2	SRRM1	0.0165142	0.153685	1	-1
ID_10823	FAM107B	HNRNPD	0.0165388	-0.159266	-1	1
ID_29057	IFI27L1	HNRNPD	0.0165993	-0.144491	-1	1
ID_85437	EEF1D	SLU7	0.0167509	0.143673	1	-1
ID_39181	RPL26	ELAVL1	0.0171104	0.143267	1	-1
ID_74394	CLINT1	RBM5	0.0172654	0.146752	1	-1
ID_10823	FAM107B	RBM5	0.0173296	-0.158206	-1	1
ID_62619	PRR5	RBM5	0.0173934	-0.143316	-1	1
ID_74856	PHYKPL	TIA1	0.0175638	-0.143116	-1	-1
ID_62619	PRR5	HNRNPDL	0.0178787	-0.142769	-1	1
ID_33383	IL32	HNRNPH2	0.0180168	0.142397	1	-1
ID_55030	IL1RN	HNRNPDL	0.0180557	-0.150448	-1	1
ID_74649	NOP16	PSMD4	0.0183425	-0.141817	-1	-1
ID_37707	CMC2	HNRNPA0	0.0184796	0.151188	1	-1
ID_43804	AFMID	HNRNPH3	0.018535	-0.141579	-1	1
ID_62619	PRR5	SRSF6	0.0187866	-0.141722	-1	1
ID_203434	PKM	RBM5	0.0190397	-0.141042	-1	1
ID_29057	IFI27L1	KHSRP	0.019353	-0.141337	-1	1
ID_33166	NDUFB10	KHSRP	0.019353	0.140696	1	-1
ID_84527	FAM92A1	SRSF6	0.0196541	0.162429	1	-1
ID_68075	MASP1	SLU7	0.0196898	0.140518	1	1
ID_55030	IL1RN	CELF1	0.0196898	-0.148524	-1	1
ID_117545	NOP16	SRP54	0.0198026	0.15538	1	-1
ID_33166	NDUFB10	SRP54	0.0199762	-0.139995	-1	-1
ID_33383	IL32	SLU7	0.0202473	0.139926	1	-1
ID_82341	FASTK	TIA1	0.0205503	-0.139829	-1	-1
ID_70898	PLRG1	TIAL1	0.0205503	-0.144311	-1	-1
ID_12279	KCNMA1	ELAVL1	0.0205845	0.140371	1	-1
ID_18676	PPP2R1B	RBM25	0.020709	0.14192	1	-1
ID_12281	KCNMA1	KHSRP	0.0207909	-0.140137	-1	1
ID_12281	KCNMA1	TIA1	0.0210027	-0.139925	-1	1
ID_16624	GPR137	HNRNPA1	0.0210228	-0.138862	-1	1
ID_25012	OGFOD2	NOVA1	0.0211093	0.139782	1	-1
ID_117545	NOP16	HNRNPD	0.0213272	0.153577	1	-1
ID_74856	PHYKPL	HNRNPA0	0.0216148	-0.138673	-1	-1
ID_12281	KCNMA1	SRSF6	0.0216148	-0.139268	-1	1
ID_72590	WDR41	SRRM1	0.0217123	-0.144597	-1	-1
ID_12281	KCNMA1	TIAL1	0.0217818	-0.139076	-1	1
ID_42832	RPS6KB1	QKI	0.022073	-0.13779	-1	-1
ID_74856	PHYKPL	HNRNPH1	0.0221721	-0.138085	-1	-1
ID_29057	IFI27L1	HNRNPH3	0.022585	-0.137918	-1	1
ID_203434	PKM	SRRM1	0.0230925	-0.136876	-1	1
ID_45699	KIAA1468	HNRNPD	0.0231412	0.145304	1	-1
ID_64633	NME6	TIA1	0.0233563	0.144831	1	-1
ID_8282	IQGAP3	CELF1	0.0233563	-0.136793	-1	-1
ID_53554	GPR75-ASB3	RBMX	0.0234261	0.150493	1	-1
ID_53555	GPR75-ASB3	RBMX	0.0234261	-0.150493	-1	1
ID_16624	GPR137	HNRNPH1	0.0239275	-0.136059	-1	1
ID_74649	NOP16	RBM25	0.0239275	0.136042	1	-1
ID_62619	PRR5	HNRNPH1	0.0239568	-0.136393	-1	1
ID_43804	AFMID	HNRNPDL	0.0241233	-0.135841	-1	1
ID_74394	CLINT1	HNRNPH1	0.0241774	0.13925	1	-1
ID_74649	NOP16	HNRNPH1	0.0241774	0.135751	1	-1
ID_85610	VPS28	SRRM1	0.0243181	0.135594	1	-1
ID_37707	CMC2	TIA1	0.0243181	0.144747	1	-1
ID_74649	NOP16	HNRNPH3	0.0245167	0.135417	1	-1
ID_88297	EXD3	SLU7	0.0246596	-0.135283	-1	1
ID_62619	PRR5	SF3B1	0.0247979	-0.135549	-1	1
ID_55030	IL1RN	SRSF6	0.0249717	-0.14291	-1	1
ID_12279	KCNMA1	QKI	0.0252787	0.135734	1	-1
ID_16624	GPR137	RBM5	0.0254956	-0.134557	-1	1
ID_39181	RPL26	HNRNPH3	0.0257586	0.134338	1	-1
ID_84527	FAM92A1	RBM25	0.0257786	0.155406	1	-1
ID_10823	FAM107B	ELAVL1	0.0259297	-0.14844	-1	1
ID_12279	KCNMA1	RBM25	0.0259297	0.135128	1	-1
ID_42832	RPS6KB1	SRRM1	0.0260133	-0.134056	-1	-1
ID_80899	TAF6	QKI	0.0260838	0.143938	1	-1
ID_8282	IQGAP3	RBM5	0.0260838	-0.13416	-1	-1
ID_70898	PLRG1	ELAVL1	0.0266549	-0.138227	-1	-1
ID_45804	CYB5A	TIA1	0.026937	-0.133272	-1	-1
ID_45803	CYB5A	TIA1	0.026937	0.133272	1	-1
ID_17233	TMEM134	NOVA1	0.0274127	0.132913	1	-1
ID_85437	EEF1D	SRP54	0.0281869	0.132354	1	-1
ID_62619	PRR5	HNRNPH3	0.0288268	-0.132277	-1	1
ID_80899	TAF6	NOVA1	0.0288268	0.141703	1	-1
ID_8282	IQGAP3	TIAL1	0.0290311	-0.131906	-1	-1
ID_50360	APOC1	SLU7	0.0299078	0.131115	1	-1
ID_37707	CMC2	RBM5	0.0300246	0.139844	1	-1
ID_53554	GPR75-ASB3	HNRNPA1	0.0301199	0.144351	1	-1
ID_53555	GPR75-ASB3	HNRNPA1	0.0301199	-0.144351	-1	1
ID_12281	KCNMA1	SF3B1	0.0301878	-0.131801	-1	1
ID_29057	IFI27L1	TIAL1	0.0302651	-0.13134	-1	1
ID_53554	GPR75-ASB3	SRRM1	0.0305552	0.143913	1	-1
ID_53555	GPR75-ASB3	SRRM1	0.0305552	-0.143913	-1	1
ID_39181	RPL26	RBM5	0.0305552	0.130524	1	-1
ID_85437	EEF1D	HNRNPH2	0.032174	0.129477	1	-1
ID_12279	KCNMA1	KHSRP	0.0322148	0.130381	1	-1
ID_70898	PLRG1	HNRNPH1	0.0322937	-0.13391	-1	-1
ID_29057	IFI27L1	RBM5	0.0322937	-0.129901	-1	1
ID_39181	RPL26	SRSF6	0.0327833	0.129013	1	-1
ID_8282	IQGAP3	ELAVL1	0.0328553	-0.129135	-1	-1
ID_8282	IQGAP3	HNRNPDL	0.0328849	-0.129093	-1	-1
ID_89926	PLS3	HNRNPA0	0.0334018	0.128574	1	1
ID_29057	IFI27L1	CELF1	0.0338202	-0.128869	-1	1
ID_12279	KCNMA1	TIAL1	0.0340405	0.129072	1	-1
ID_72590	WDR41	CELF1	0.0340405	-0.13413	-1	-1
ID_29057	IFI27L1	ELAVL1	0.035223	-0.127989	-1	1
ID_29057	IFI27L1	RBMX	0.0356905	-0.127702	-1	1
ID_74394	CLINT1	NOVA1	0.0362538	0.130069	1	-1
ID_17233	TMEM134	QKI	0.0366685	0.126557	1	-1
ID_84527	FAM92A1	ELAVL1	0.0371404	0.146149	1	-1
ID_68075	MASP1	HNRNPA1	0.0373068	-0.126348	-1	1
ID_61101	COMT	SLU7	0.0375943	0.125986	1	-1
ID_62619	PRR5	ELAVL1	0.0385513	-0.125825	-1	1
ID_74394	CLINT1	HNRNPDL	0.038879	0.128486	1	-1
ID_84527	FAM92A1	CELF1	0.0388848	0.144948	1	-1
ID_43804	AFMID	SRSF6	0.0393557	-0.12497	-1	1
ID_42832	RPS6KB1	SLU7	0.0395114	-0.124867	-1	-1
ID_74856	PHYKPL	RBMX	0.0395913	-0.125167	-1	-1
ID_8282	IQGAP3	KHSRP	0.0397519	-0.12487	-1	-1
ID_39180	RPL26	HNRNPA1	0.0397519	-0.124672	-1	-1
ID_12279	KCNMA1	TIA1	0.0397521	0.125566	1	-1
ID_8282	IQGAP3	TIA1	0.0398054	-0.124779	-1	-1
ID_82341	FASTK	HNRNPH1	0.0399227	-0.124879	-1	-1
ID_12279	KCNMA1	SRSF6	0.0410526	0.124837	1	-1
ID_117545	NOP16	ELAVL1	0.0415712	0.137063	1	-1
ID_15770	PTPMT1	TIA1	0.0415712	0.123639	1	-1
ID_43804	AFMID	SF3B1	0.0416468	-0.123561	-1	1
ID_39181	RPL26	NOVA1	0.041759	0.123482	1	-1
ID_62619	PRR5	SLU7	0.0422712	-0.12357	-1	1
ID_74394	CLINT1	RBMX	0.0426215	0.126183	1	-1
ID_74649	NOP16	TIA1	0.0428626	0.122878	1	-1
ID_39181	RPL26	RBMX	0.0428997	0.122837	1	-1
ID_62619	PRR5	CELF1	0.0429224	-0.123162	-1	1
ID_37707	CMC2	HNRNPH2	0.0431456	0.130949	1	-1
ID_62619	PRR5	HNRNPH2	0.0440717	-0.122571	-1	1
ID_10823	FAM107B	HNRNPDL	0.0450711	-0.134725	-1	1
ID_203434	PKM	CELF1	0.0452575	-0.121619	-1	1
ID_55030	IL1RN	SLU7	0.0453959	-0.128669	-1	1
ID_72590	WDR41	HNRNPH1	0.0454574	-0.127168	-1	-1
ID_8282	IQGAP3	RBM25	0.0466686	-0.121089	-1	-1
ID_29057	IFI27L1	HNRNPA0	0.0468061	-0.121359	-1	1
ID_68075	MASP1	HNRNPA0	0.0471086	-0.120846	-1	1
ID_37707	CMC2	CELF1	0.0480201	0.128363	1	-1
ID_203434	PKM	TIAL1	0.0481494	-0.120168	-1	1
ID_84527	FAM92A1	HNRNPD	0.0482553	0.139016	1	-1
ID_70898	PLRG1	HNRNPA0	0.0489122	-0.124023	-1	-1
ID_70898	PLRG1	SLU7	0.0493335	-0.123813	-1	-1
ID_10823	FAM107B	HNRNPH1	0.0496861	-0.132172	-1	1
